# Supplementary material for: Identification of a New Prognostic Risk Signature of Clear Cell Renal Cell Carcinoma Based on N6-Methyladenosine RNA Methylation Regulators
Source: Hindawi journal article supplement (doi:10.1155/2021/6617841), 2021-02-12
Supplement: f1 [file 6617841.f1.pdf]

## Supplementary materials

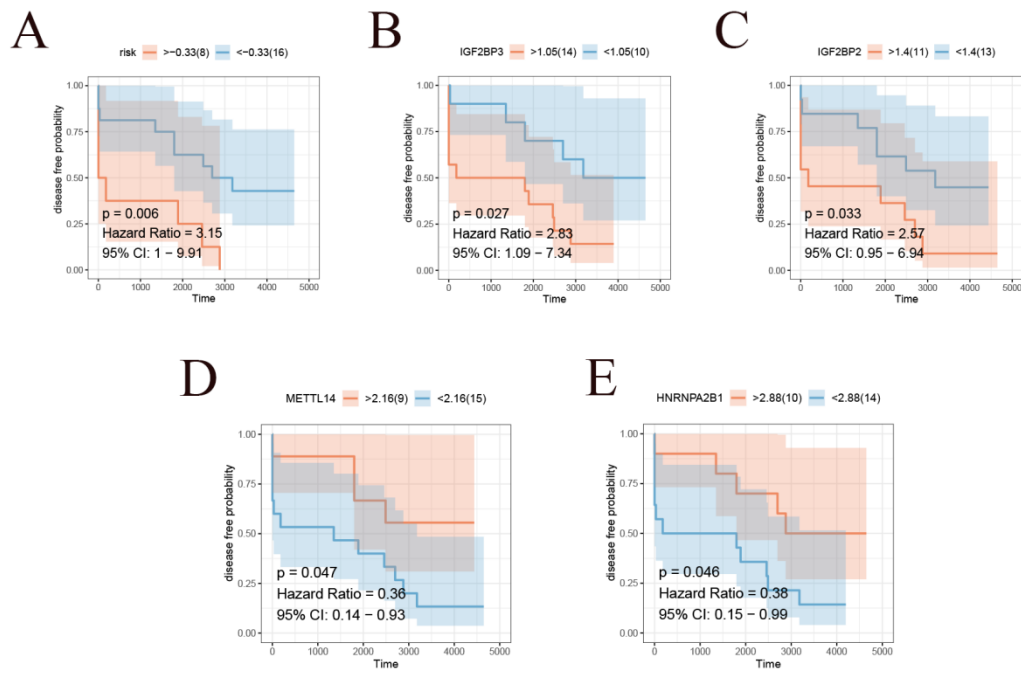

**Figure S1:** External verification based on the GSE22541 data set. DFS curve of ccRCC patients for the following factors: (A) Risk model; (B) IGF2BP3; (C) IGF2BP2; (D) METTL14; (E) HNRNPA2B1. The corresponding *P* values are shown in the graph.

**Table S1**

| id                           | Cluster | ALKBH5    | KIAA1429  | RBM15B    | IGF2BP2    | HNRNPA2B1  |
|------------------------------|---------|-----------|-----------|-----------|------------|------------|
| TCGA-3Z-A93Z-01A-11R-A37O-07 | 1       | 48.524387 | 4.4757061 | 8.4600472 | 0.48213404 | 67.9260628 |
| TCGA-6D-AA2E-01A-11R-A37O-07 | 2       | 40.263207 | 3.4361205 | 10.402739 | 1.0878436  | 79.5256459 |
| TCGA-A3-3306-01A-01R-0864-07 | 1       | 47.080077 | 6.6158352 | 5.3507953 | 0.17545998 | 46.7410302 |
| TCGA-A3-3307-01A-01R-0864-07 | 2       | 48.35366  | 5.9832176 | 7.421214  | 0.10389617 | 70.7815916 |
| TCGA-A3-3308-01A-02R-1325-07 | 2       | 50.496035 | 8.0340453 | 7.495835  | 0.48138781 | 75.6415141 |
| TCGA-A3-3311-01A-02R-1325-07 | 1       | 40.544402 | 6.2669107 | 5.8786208 | 1.49793096 | 60.0020406 |
| TCGA-A3-3313-01A-02R-1325-07 | 1       | 42.569831 | 6.3162739 | 9.7066493 | 0.37871781 | 63.6191007 |
| TCGA-A3-3316-01A-01R-0864-07 | 2       | 29.725711 | 8.6908327 | 6.6170721 | 1.06815266 | 86.2153214 |
| TCGA-A3-3317-01A-02R-1325-07 | 2       | 49.054079 | 7.0918797 | 8.2658286 | 0.8584838  | 74.1318433 |
| TCGA-A3-3319-01A-02R-1325-07 | 1       | 49.773011 | 6.2874933 | 3.9240507 | 3.1811983  | 55.84874   |
| TCGA-A3-3320-01A-02R-1325-07 | 2       | 57.505406 | 7.4683539 | 7.131238  | 0.1541497  | 83.3458138 |
| TCGA-A3-3322-01A-02R-1325-07 | 1       | 41.001485 | 6.8248979 | 5.8912402 | 0.26914223 | 68.527321  |
| TCGA-A3-3323-01A-02R-1325-07 | 1       | 30.840947 | 8.5861485 | 6.4858211 | 0.76801314 | 60.2246435 |
| TCGA-A3-3324-01A-02R-1325-07 | 1       | 28.443607 | 6.9382683 | 5.8144304 | 0.09108028 | 62.179157  |
| TCGA-A3-3325-01A-01R-0864-07 | 2       | 68.394206 | 5.3332369 | 8.5560954 | 0.19744416 | 93.9488254 |
| TCGA-A3-3326-01A-01R-0864-07 | 2       | 40.338364 | 6.0676736 | 6.0830256 | 0.36628036 | 85.5498267 |
| TCGA-A3-3328-01A-01R-0864-07 | 2       | 49.39115  | 4.7491287 | 9.5704264 | 2.927084   | 82.2689818 |
| TCGA-A3-3329-01A-01R-0864-07 | 1       | 41.657542 | 3.2400419 | 6.4164673 | 0.14049564 | 63.8097395 |
| TCGA-A3-3331-01A-02R-1325-07 | 1       | 49.796715 | 6.6751708 | 6.4923003 | 0.14636343 | 66.0128088 |
| TCGA-A3-3335-01A-01R-0864-07 | 1       | 45.98788  | 4.0348187 | 2.9431897 | 0.1864435  | 42.0500139 |
| TCGA-A3-3343-01A-01R-0864-07 | 1       | 48.990735 | 5.7936356 | 5.7359169 | 0.41827488 | 54.3238896 |
| TCGA-A3-3346-01A-01R-1766-07 | 1       | 41.922442 | 3.7135521 | 4.8088983 | 0.42044539 | 66.2194988 |
| TCGA-A3-3347-01A-02R-1325-07 | 2       | 39.859096 | 6.2645216 | 7.7293959 | 1.84855412 | 86.6223954 |
| TCGA-A3-3349-01A-01R-1188-07 | 2       | 39.732709 | 7.0640902 | 8.0062767 | 0.11504361 | 74.0625124 |
| TCGA-A3-3351-01A-02R-1325-07 | 2       | 35.50008  | 8.1291496 | 6.5505382 | 0.18227156 | 83.8689224 |
| TCGA-A3-3352-01A-01R-0864-07 | 2       | 44.072999 | 6.5778923 | 5.5112911 | 0.22692917 | 82.2013158 |
| TCGA-A3-3357-01A-02R-1420-07 | 1       | 41.416401 | 5.8327685 | 4.4955679 | 0.109631   | 61.8865841 |
| TCGA-A3-3358-01A-01R-1541-07 | 1       | 36.692735 | 4.8283323 | 4.6240833 | 1.24956453 | 46.1002283 |
| TCGA-A3-3359-01A-01R-0864-07 | 2       | 54.863276 | 6.0721057 | 6.7776498 | 0.10984173 | 76.3149864 |
| TCGA-A3-3362-01A-02R-1325-07 | 2       | 46.172201 | 6.0968357 | 7.1895037 | 0.86966403 | 71.5715825 |
| TCGA-A3-3363-01A-01R-0864-07 | 1       | 36.992525 | 3.6547381 | 8.1353041 | 9.78633052 | 51.2630224 |
| TCGA-A3-3365-01A-01R-0864-07 | 2       | 44.57009  | 5.4060241 | 8.1200316 | 0.13099782 | 65.1577332 |
| TCGA-A3-3367-01A-02R-1420-07 | 1       | 41.126984 | 8.0136104 | 5.0549115 | 0.21890195 | 64.6352559 |
| TCGA-A3-3370-01A-02R-1420-07 | 2       | 46.936783 | 6.8732397 | 6.6642667 | 0.2533866  | 78.8543497 |
| TCGA-A3-3372-01A-02R-1325-07 | 2       | 43.959059 | 6.2947217 | 8.4063199 | 0.13344824 | 72.1325659 |
| TCGA-A3-3373-01A-02R-1420-07 | 1       | 47.982574 | 4.2602063 | 7.660114  | 0.25453677 | 54.6381112 |
| TCGA-A3-3374-01A-02R-1325-07 | 1       | 25.109021 | 2.4538897 | 9.0202683 | 1.2671243  | 34.699866  |
| TCGA-A3-3376-01A-02R-1420-07 | 1       | 38.100693 | 8.7879327 | 10.606214 | 0.20978079 | 69.1449205 |
| TCGA-A3-3378-01A-02R-1325-07 | 1       | 46.746504 | 4.27568   | 5.8630397 | 0.36234042 | 71.8796273 |
| TCGA-A3-3380-01A-01R-0864-07 | 1       | 44.730027 | 6.9041224 | 5.931054  | 0.13815983 | 67.1470338 |
| TCGA-A3-3382-01A-02R-1325-07 | 1       | 42.530448 | 8.6700563 | 5.5655579 | 0.75492127 | 63.2336913 |
| TCGA-A3-3383-01A-02R-1325-07 | 1       | 70.253396 | 3.7630605 | 5.8806636 | 0.15371616 | 66.3896467 |
| TCGA-A3-3385-01A-02R-1420-07 | 1       | 40.223298 | 7.0570144 | 7.3294684 | 0.05007368 | 66.320801  |
| TCGA-A3-3387-01A-01R-1541-07 | 1       | 40.425426 | 7.8770162 | 6.8065164 | 1.11458311 | 64.4551766 |
| TCGA-A3-A6NI-01A-11R-A33J-07 | 1       | 43.93513  | 5.0969659 | 6.9608168 | 0.15896923 | 70.1018498 |
| TCGA-A3-A6NJ-01A-12R-A33J-07 | 2       | 49.942825 | 5.0332988 | 8.9574607 | 0.39995034 | 75.9296354 |
| TCGA-A3-A6NL-01A-11R-A33J-07 | 2       | 35.694543 | 6.2772437 | 8.1194376 | 0.12590389 | 74.5326555 |
| TCGA-A3-A6NN-01A-12R-A33J-07 | 1       | 42.583232 | 4.9547734 | 8.5322093 | 0.16145265 | 67.5479587 |
| TCGA-A3-A8CQ-01A-11R-A37O-07 | 2       | 56.261145 | 6.269834  | 10.5531   | 0.538703   | 93.2438901 |
| TCGA-A3-A8OU-01A-11R-A37O-07 | 2       | 51.757637 | 4.5363519 | 7.1639402 | 0.35927313 | 79.1688168 |

|                              |   |           |           |           |            |            |
|------------------------------|---|-----------|-----------|-----------|------------|------------|
| TCGA-A3-A8OV-01A-11R-A37O-07 | 2 | 61.353576 | 5.1109002 | 6.0634128 | 0.11691034 | 78.2802179 |
| TCGA-A3-A8OW-01A-11R-A37O-07 | 2 | 40.11695  | 5.6604459 | 8.4098388 | 0.18152495 | 93.4202625 |
| TCGA-A3-A8OX-01A-11R-A37O-07 | 2 | 42.104769 | 4.3042935 | 10.689303 | 0.45036391 | 73.5279939 |
| TCGA-AK-3425-01A-02R-1277-07 | 1 | 35.805112 | 6.0758943 | 6.2353834 | 2.21616783 | 49.733945  |
| TCGA-AK-3426-01A-02R-1325-07 | 1 | 31.567663 | 2.5880933 | 5.4658654 | 0.44918343 | 65.5241452 |
| TCGA-AK-3427-01A-01R-0864-07 | 1 | 23.200307 | 3.1631571 | 3.3968138 | 1.57468394 | 25.2954011 |
| TCGA-AK-3428-01A-02R-1277-07 | 1 | 52.845211 | 9.7936913 | 6.7258416 | 0.45176982 | 43.0453537 |
| TCGA-AK-3429-01A-02R-1325-07 | 1 | 34.939599 | 5.6668632 | 5.0683173 | 0.0916291  | 51.1689094 |
| TCGA-AK-3431-01A-02R-1277-07 | 1 | 42.381136 | 7.7724312 | 7.886533  | 0.18912289 | 48.6812507 |
| TCGA-AK-3433-01A-02R-1277-07 | 1 | 15.868661 | 5.4117687 | 5.341471  | 3.37472849 | 68.7587033 |
| TCGA-AK-3434-01A-02R-1277-07 | 1 | 46.227813 | 5.3502568 | 5.5349884 | 0.42390127 | 57.9604766 |
| TCGA-AK-3436-01A-02R-1325-07 | 1 | 25.487664 | 7.5686594 | 4.3796698 | 1.30621485 | 35.2315868 |
| TCGA-AK-3440-01A-02R-1277-07 | 1 | 17.622262 | 3.3345933 | 9.1670714 | 5.97284074 | 66.6698881 |
| TCGA-AK-3443-01A-02R-1325-07 | 2 | 23.332174 | 5.0601003 | 7.70684   | 4.61371162 | 91.2742063 |
| TCGA-AK-3445-01A-02R-1277-07 | 1 | 39.542833 | 9.9095007 | 5.4161676 | 0.18107605 | 49.7746767 |
| TCGA-AK-3447-01A-01R-1766-07 | 1 | 5.2587717 | 1.40434   | 1.4705322 | 0.59124194 | 17.2958151 |
| TCGA-AK-3450-01A-02R-1277-07 | 1 | 50.356956 | 4.7244018 | 4.7369989 | 0.13019772 | 63.735612  |
| TCGA-AK-3451-01A-02R-1188-07 | 1 | 24.595542 | 3.0073022 | 1.7105214 | 0.4845636  | 32.4511909 |
| TCGA-AK-3453-01A-02R-1277-07 | 2 | 35.389593 | 3.8553923 | 5.9465657 | 0.34664432 | 81.8264431 |
| TCGA-AK-3454-01A-02R-1277-07 | 2 | 29.20091  | 3.7356845 | 6.0164661 | 0.76351247 | 82.0662925 |
| TCGA-AK-3455-01A-01R-0864-07 | 1 | 43.481805 | 5.0307485 | 3.9291354 | 0.07677512 | 65.2403534 |
| TCGA-AK-3456-01A-02R-1325-07 | 1 | 18.638048 | 5.3830263 | 9.0257415 | 1.77091285 | 53.2482414 |
| TCGA-AK-3458-01A-01R-1503-07 | 1 | 24.792241 | 3.4345804 | 2.1857749 | 0.37788897 | 37.041873  |
| TCGA-AK-3460-01A-02R-1277-07 | 1 | 32.57752  | 6.2873286 | 5.1400479 | 0.14915366 | 58.8561501 |
| TCGA-AK-3461-01A-02R-1277-07 | 2 | 40.367938 | 6.0372317 | 7.5087008 | 0.49335401 | 89.5614062 |
| TCGA-AK-3465-01A-02R-1325-07 | 1 | 22.231156 | 4.9959145 | 8.8233538 | 3.77095384 | 74.4514305 |
| TCGA-AS-3777-01A-01R-0864-07 | 1 | 13.007075 | 2.8532843 | 5.3285245 | 1.19781338 | 37.7853295 |
| TCGA-AS-3778-01A-01R-A32Z-07 | 1 | 43.967954 | 5.7484018 | 7.1239196 | 0.18695192 | 60.6000881 |
| TCGA-B0-4688-01A-01R-1277-07 | 2 | 34.47691  | 8.0710679 | 11.620751 | 6.21571068 | 111.585415 |
| TCGA-B0-4690-01A-01R-1277-07 | 2 | 44.204573 | 6.8443663 | 7.4281248 | 7.03416116 | 93.0067603 |
| TCGA-B0-4691-01A-01R-1277-07 | 2 | 50.055811 | 3.6753176 | 4.9143125 | 0.22186133 | 74.9865868 |
| TCGA-B0-4693-01A-01R-1277-07 | 2 | 50.769556 | 5.5884665 | 6.6831936 | 0.08045844 | 72.1677056 |
| TCGA-B0-4694-01A-01R-1277-07 | 1 | 31.951206 | 4.7990474 | 5.5145256 | 0.98911852 | 53.5884333 |
| TCGA-B0-4696-01A-01R-1277-07 | 2 | 77.744234 | 11.892678 | 9.0004642 | 0.05764137 | 107.375768 |
| TCGA-B0-4697-01A-01R-1277-07 | 2 | 45.342852 | 4.2906131 | 7.4994196 | 6.12376801 | 107.968261 |
| TCGA-B0-4698-01A-01R-1503-07 | 2 | 23.739293 | 8.8032019 | 10.850325 | 26.6604948 | 134.90236  |
| TCGA-B0-4699-01A-01R-1277-07 | 2 | 35.260237 | 6.1976781 | 9.8389221 | 11.5271104 | 95.3073281 |
| TCGA-B0-4700-01A-02R-1541-07 | 1 | 45.219072 | 3.7681464 | 7.5116323 | 2.21304104 | 69.3855488 |
| TCGA-B0-4701-01A-01R-1277-07 | 2 | 46.502114 | 4.9689026 | 5.1481079 | 1.09032856 | 83.1963232 |
| TCGA-B0-4703-01A-01R-1277-07 | 2 | 42.364107 | 6.8302247 | 7.6207552 | 1.86923511 | 80.8128195 |
| TCGA-B0-4706-01A-01R-1503-07 | 2 | 44.721653 | 4.7701266 | 6.405423  | 1.3072968  | 74.9012032 |
| TCGA-B0-4707-01A-01R-1277-07 | 1 | 29.944977 | 2.9414556 | 5.9324726 | 0.94067523 | 57.5111    |
| TCGA-B0-4710-01A-01R-1503-07 | 2 | 47.189071 | 5.908345  | 6.962738  | 0.54491659 | 97.8941882 |
| TCGA-B0-4712-01A-01R-1503-07 | 1 | 30.08748  | 4.7947006 | 5.8944585 | 7.28713871 | 58.6315792 |
| TCGA-B0-4713-01A-01R-1277-07 | 1 | 43.380923 | 4.634002  | 4.1598766 | 0.20678779 | 63.4742956 |
| TCGA-B0-4714-01A-01R-1277-07 | 2 | 32.81752  | 3.9066937 | 5.0113647 | 0.36460919 | 106.823212 |
| TCGA-B0-4718-01A-01R-1277-07 | 2 | 44.545782 | 3.4972797 | 5.4831441 | 0.4062373  | 86.1379941 |
| TCGA-B0-4810-01A-01R-1503-07 | 2 | 62.338795 | 4.8943397 | 6.7273617 | 1.86369379 | 80.8487978 |
| TCGA-B0-4811-01A-01R-1503-07 | 2 | 24.466491 | 3.2261411 | 4.7145383 | 0.78750206 | 109.225289 |
| TCGA-B0-4813-01A-01R-1277-07 | 2 | 40.226134 | 2.4334158 | 6.7932536 | 0.2031859  | 96.1164586 |
| TCGA-B0-4814-01A-01R-1277-07 | 1 | 38.732198 | 8.1712271 | 5.1058473 | 0.09237571 | 66.5745887 |
| TCGA-B0-4815-01A-01R-1503-07 | 2 | 36.626008 | 6.0923964 | 6.3984373 | 0.7444364  | 105.15304  |

|                              |   |           |           |           |            |            |
|------------------------------|---|-----------|-----------|-----------|------------|------------|
| TCGA-B0-4816-01A-01R-1503-07 | 2 | 35.780929 | 4.8211334 | 7.5100487 | 0.29016031 | 78.3425145 |
| TCGA-B0-4817-01A-01R-1277-07 | 1 | 26.830423 | 3.467028  | 3.7879383 | 0.15511572 | 62.2642601 |
| TCGA-B0-4818-01A-01R-1503-07 | 2 | 57.381921 | 5.3692097 | 5.847698  | 0.10843458 | 90.1357581 |
| TCGA-B0-4819-01A-01R-1277-07 | 2 | 28.881105 | 3.553405  | 6.474829  | 1.33861116 | 80.0851676 |
| TCGA-B0-4821-01A-01R-1503-07 | 2 | 43.051937 | 2.809069  | 4.2947452 | 4.78113138 | 86.7709605 |
| TCGA-B0-4822-01A-01R-1277-07 | 2 | 29.775909 | 2.7946123 | 5.5529864 | 0.66566273 | 83.934381  |
| TCGA-B0-4823-01A-02R-1420-07 | 1 | 46.615256 | 7.0613805 | 6.9808553 | 0.09269075 | 43.7086464 |
| TCGA-B0-4824-01A-01R-1277-07 | 2 | 50.275797 | 4.910497  | 4.8279052 | 0.27280069 | 85.7896492 |
| TCGA-B0-4827-01A-02R-1420-07 | 1 | 85.814191 | 4.9764234 | 6.3461153 | 0.34233248 | 50.378648  |
| TCGA-B0-4828-01A-01R-1277-07 | 2 | 50.922982 | 5.1225636 | 5.8778774 | 1.59672861 | 85.1224807 |
| TCGA-B0-4833-01A-01R-1305-07 | 2 | 43.389099 | 4.1811914 | 6.2236862 | 0.23637344 | 77.2379931 |
| TCGA-B0-4834-01A-01R-1305-07 | 1 | 29.480868 | 6.2485508 | 5.6413783 | 4.60498066 | 53.5633167 |
| TCGA-B0-4836-01A-01R-1305-07 | 1 | 40.823418 | 5.6622511 | 5.6846285 | 0.57505093 | 58.4154099 |
| TCGA-B0-4837-01A-01R-1305-07 | 1 | 42.714862 | 4.9129784 | 6.1368364 | 0.29782435 | 51.122259  |
| TCGA-B0-4838-01A-01R-1305-07 | 2 | 53.77271  | 5.3210939 | 6.5427802 | 0.10511871 | 83.9939107 |
| TCGA-B0-4839-01A-01R-1305-07 | 1 | 30.390804 | 4.1874799 | 6.558427  | 0.15815961 | 41.2153035 |
| TCGA-B0-4841-01A-01R-1277-07 | 1 | 26.214835 | 3.2400665 | 4.159418  | 0.14601699 | 41.890942  |
| TCGA-B0-4842-01A-02R-1420-07 | 1 | 66.065278 | 2.7323778 | 7.2939341 | 0.17703917 | 47.2322726 |
| TCGA-B0-4843-01A-01R-1277-07 | 1 | 35.316077 | 3.8410499 | 6.5254391 | 0.83910991 | 68.2613066 |
| TCGA-B0-4844-01A-01R-1277-07 | 1 | 49.607367 | 4.0344851 | 5.5562422 | 0.56583052 | 61.7012382 |
| TCGA-B0-4845-01A-01R-1277-07 | 2 | 45.238917 | 3.9082753 | 7.5560771 | 0.10117095 | 102.762799 |
| TCGA-B0-4846-01A-01R-1277-07 | 2 | 52.932713 | 5.613843  | 6.1348943 | 0.31778594 | 88.338965  |
| TCGA-B0-4847-01A-01R-1277-07 | 2 | 36.665178 | 3.192325  | 4.4252524 | 0.20624609 | 87.907823  |
| TCGA-B0-4848-01A-01R-1277-07 | 1 | 49.983353 | 5.6191899 | 6.8377658 | 1.47612524 | 63.7071587 |
| TCGA-B0-4849-01A-01R-1277-07 | 2 | 49.681949 | 4.7412312 | 6.9547237 | 0.39651377 | 109.998847 |
| TCGA-B0-4852-01A-01R-1503-07 | 2 | 39.255528 | 6.6692575 | 5.5622821 | 0.42729065 | 122.917576 |
| TCGA-B0-4945-01A-01R-1420-07 | 2 | 52.064653 | 4.5551848 | 8.4514566 | 0.26166574 | 102.890217 |
| TCGA-B0-5075-01A-01R-1334-07 | 1 | 43.484748 | 4.5766383 | 4.9895385 | 0.14633605 | 71.4648299 |
| TCGA-B0-5077-01A-01R-1334-07 | 2 | 51.118773 | 6.3558963 | 6.1903706 | 0.28696861 | 79.491095  |
| TCGA-B0-5080-01A-01R-1503-07 | 1 | 45.931091 | 6.4423821 | 10.471861 | 0.74188358 | 57.8055903 |
| TCGA-B0-5081-01A-01R-1334-07 | 2 | 29.742126 | 3.9584886 | 6.4643755 | 2.37985297 | 86.1013164 |
| TCGA-B0-5083-01A-02R-1420-07 | 1 | 23.326364 | 5.0293496 | 6.0835441 | 2.85805461 | 55.4324216 |
| TCGA-B0-5084-01A-01R-1334-07 | 2 | 24.097239 | 5.1924867 | 8.3863073 | 16.9070269 | 85.4179024 |
| TCGA-B0-5085-01A-01R-1334-07 | 1 | 36.833809 | 2.7399935 | 3.7503358 | 0.15609311 | 73.5424315 |
| TCGA-B0-5088-01A-01R-1334-07 | 2 | 37.825776 | 4.1917856 | 5.7431476 | 0.22586857 | 77.0003377 |
| TCGA-B0-5092-01A-01R-1420-07 | 2 | 39.281936 | 4.3005427 | 5.5280788 | 3.00072575 | 99.9692914 |
| TCGA-B0-5094-01A-01R-1420-07 | 1 | 45.861171 | 6.0821479 | 5.0982689 | 0.23933346 | 62.7913652 |
| TCGA-B0-5095-01A-01R-1420-07 | 2 | 42.443208 | 6.4873025 | 7.998285  | 0.48722503 | 74.9942097 |
| TCGA-B0-5096-01A-01R-1420-07 | 1 | 41.384214 | 8.4617101 | 5.8248919 | 5.8389783  | 53.3235066 |
| TCGA-B0-5097-01A-01R-1420-07 | 2 | 34.942413 | 8.1190018 | 8.524946  | 4.89350639 | 71.988488  |
| TCGA-B0-5098-01A-01R-1420-07 | 2 | 48.705685 | 5.7581562 | 8.3483174 | 28.6563805 | 89.9611931 |
| TCGA-B0-5099-01A-01R-1420-07 | 2 | 56.732148 | 5.1304406 | 7.8267913 | 0.16504526 | 71.810102  |
| TCGA-B0-5100-01A-01R-1420-07 | 1 | 47.800773 | 4.5759657 | 9.9994377 | 5.29386111 | 58.6472481 |
| TCGA-B0-5102-01A-01R-1420-07 | 1 | 72.037633 | 4.9996273 | 6.1704745 | 0.06307801 | 62.3964432 |
| TCGA-B0-5104-01A-01R-1420-07 | 2 | 50.501475 | 4.6425723 | 6.4528771 | 0.27192525 | 83.2015038 |
| TCGA-B0-5106-01A-01R-1420-07 | 1 | 28.638761 | 5.8237117 | 7.0793296 | 0.3200446  | 71.382536  |
| TCGA-B0-5107-01A-01R-1420-07 | 2 | 52.711063 | 3.6095563 | 7.6043546 | 2.75222998 | 95.4592666 |
| TCGA-B0-5108-01A-01R-1420-07 | 1 | 34.74856  | 7.8095445 | 7.4335058 | 0.72489174 | 69.8765152 |
| TCGA-B0-5109-01A-02R-1420-07 | 2 | 51.570499 | 6.9619475 | 8.1394867 | 16.9439917 | 120.85056  |
| TCGA-B0-5110-01A-01R-1420-07 | 2 | 43.083559 | 7.1497394 | 8.3534371 | 0.20534341 | 84.6507943 |
| TCGA-B0-5113-01A-01R-1420-07 | 2 | 38.543469 | 8.4496625 | 6.955495  | 0.36691077 | 73.4317307 |
| TCGA-B0-5115-01A-01R-1420-07 | 2 | 38.088323 | 6.9551575 | 5.5311456 | 0.22446428 | 77.5155815 |

|                              |   |           |           |           |            |            |
|------------------------------|---|-----------|-----------|-----------|------------|------------|
| TCGA-B0-5116-01A-02R-1420-07 | 1 | 45.248925 | 7.033518  | 7.0269983 | 7.09917502 | 44.7557085 |
| TCGA-B0-5117-01A-01R-1420-07 | 1 | 16.151947 | 3.2590168 | 8.6047595 | 4.22997886 | 54.6810192 |
| TCGA-B0-5119-01A-02R-1420-07 | 1 | 65.036032 | 7.2429436 | 6.9606134 | 0.17583752 | 61.307644  |
| TCGA-B0-5120-01A-01R-1420-07 | 1 | 50.178694 | 8.1994464 | 7.3656701 | 0.24098839 | 60.0972485 |
| TCGA-B0-5121-01A-02R-1420-07 | 1 | 35.889002 | 4.1094756 | 5.5058883 | 0.19462692 | 57.4746099 |
| TCGA-B0-5399-01A-01R-1503-07 | 2 | 50.06798  | 5.9882536 | 6.5855301 | 0.0650453  | 72.7933301 |
| TCGA-B0-5400-01A-01R-1503-07 | 1 | 59.038222 | 2.5482654 | 5.4404256 | 0.29916172 | 51.438286  |
| TCGA-B0-5402-01A-01R-1503-07 | 1 | 40.728547 | 8.8323324 | 7.3890984 | 3.02113246 | 60.2093107 |
| TCGA-B0-5690-01A-11R-1541-07 | 1 | 42.826631 | 6.2456481 | 10.977518 | 0.20382511 | 66.4463348 |
| TCGA-B0-5691-01A-11R-1541-07 | 1 | 43.171535 | 8.0146624 | 9.6662752 | 1.46136232 | 60.1554515 |
| TCGA-B0-5692-01A-11R-1541-07 | 1 | 53.443172 | 5.465523  | 6.7974171 | 0.05470105 | 60.3621014 |
| TCGA-B0-5693-01A-11R-1541-07 | 2 | 53.889522 | 7.8194504 | 7.7806693 | 0.19754989 | 75.6555338 |
| TCGA-B0-5694-01A-11R-1541-07 | 1 | 39.633807 | 6.3952188 | 5.8892443 | 0.57206856 | 58.9028778 |
| TCGA-B0-5695-01A-11R-1541-07 | 2 | 59.410372 | 6.1867547 | 8.6630171 | 0.21336614 | 70.1815455 |
| TCGA-B0-5696-01A-11R-1541-07 | 1 | 60.108236 | 4.0395321 | 5.6212625 | 0.15953083 | 61.009258  |
| TCGA-B0-5697-01A-11R-1541-07 | 2 | 40.362285 | 4.3937068 | 10.440655 | 6.33013338 | 77.2223999 |
| TCGA-B0-5698-01A-11R-1672-07 | 2 | 49.580838 | 5.4872458 | 7.4436567 | 0.56779961 | 74.1171473 |
| TCGA-B0-5699-01A-11R-1541-07 | 1 | 55.839474 | 6.7597965 | 6.9001814 | 0.26523676 | 63.8519195 |
| TCGA-B0-5700-01A-11R-1541-07 | 1 | 48.325549 | 4.0742313 | 8.4014676 | 0.15303048 | 47.6055784 |
| TCGA-B0-5701-01A-11R-1541-07 | 1 | 46.605308 | 6.4977    | 6.0619826 | 0.33299595 | 52.6093466 |
| TCGA-B0-5702-01A-11R-1541-07 | 1 | 11.580707 | 1.4125277 | 4.8902064 | 1.08088116 | 18.1024107 |
| TCGA-B0-5703-01A-11R-1541-07 | 1 | 48.784413 | 4.9950325 | 7.7706174 | 0.07440782 | 57.384052  |
| TCGA-B0-5705-01A-11R-1541-07 | 1 | 44.283232 | 7.2316714 | 6.1770189 | 0.09708581 | 60.3219699 |
| TCGA-B0-5706-01A-11R-1541-07 | 1 | 52.43163  | 6.1771384 | 6.1763009 | 0.22103518 | 58.8924462 |
| TCGA-B0-5707-01A-11R-1541-07 | 2 | 41.090158 | 3.3858903 | 16.34929  | 12.5598676 | 83.1972769 |
| TCGA-B0-5709-01A-11R-1541-07 | 1 | 41.353001 | 7.1513433 | 7.9816396 | 1.84366211 | 64.3774759 |
| TCGA-B0-5710-01A-11R-1672-07 | 1 | 39.034941 | 7.7082763 | 7.1369328 | 0.28139981 | 57.5324797 |
| TCGA-B0-5711-01A-11R-1672-07 | 1 | 46.46593  | 7.9537246 | 5.9467684 | 0.09229294 | 55.7679954 |
| TCGA-B0-5712-01A-11R-1672-07 | 1 | 54.187098 | 4.5149474 | 7.2383759 | 0.15556138 | 71.9243303 |
| TCGA-B0-5713-01A-11R-1672-07 | 2 | 47.424634 | 6.9441764 | 7.0040852 | 0.10926003 | 80.7827915 |
| TCGA-B0-5812-01A-11R-1672-07 | 2 | 46.742785 | 8.5486571 | 8.8888186 | 0.33008014 | 70.4237372 |
| TCGA-B2-3923-01A-02R-1325-07 | 1 | 19.272851 | 5.9554555 | 8.4235046 | 6.06987005 | 72.1656884 |
| TCGA-B2-3923-01A-02R-A277-07 | 1 | 24.96253  | 8.5486965 | 10.051004 | 4.1521343  | 32.0532852 |
| TCGA-B2-3923-01B-10R-A277-07 | 2 | 18.013524 | 8.6566797 | 4.6356999 | 8.02831637 | 88.4344854 |
| TCGA-B2-3924-01A-02R-1325-07 | 1 | 42.568119 | 7.0302166 | 6.9184105 | 0.10506289 | 59.6431097 |
| TCGA-B2-3924-01A-02R-A277-07 | 1 | 54.347222 | 10.647769 | 7.3207102 | 0.20535095 | 49.5516516 |
| TCGA-B2-3924-01B-03R-A277-07 | 2 | 33.323664 | 10.327444 | 6.6423605 | 0.16170732 | 129.323222 |
| TCGA-B2-4098-01A-02R-1325-07 | 1 | 26.959592 | 4.6318321 | 6.6891223 | 3.73819227 | 62.0516242 |
| TCGA-B2-4099-01A-02R-1188-07 | 1 | 35.946152 | 5.1188043 | 5.6887744 | 0.24982235 | 40.7232757 |
| TCGA-B2-4101-01A-02R-1277-07 | 2 | 41.455597 | 7.3652372 | 7.6447541 | 0.41299671 | 77.2128182 |
| TCGA-B2-4102-01A-02R-1325-07 | 2 | 38.783478 | 6.5647552 | 6.7103777 | 0.49572483 | 78.9865936 |
| TCGA-B2-5633-01A-01R-1541-07 | 1 | 38.638254 | 8.5063057 | 8.3892559 | 0.3535914  | 53.6033029 |
| TCGA-B2-5633-01A-01R-A277-07 | 1 | 36.255003 | 8.7496366 | 6.9635129 | 0.14544074 | 9.63589224 |
| TCGA-B2-5633-01B-04R-A277-07 | 2 | 30.185193 | 10.814745 | 7.0523815 | 0.90745019 | 91.4339939 |
| TCGA-B2-5635-01A-01R-1541-07 | 1 | 35.096748 | 6.0019984 | 8.2126772 | 0.19038945 | 67.2306563 |
| TCGA-B2-5635-01A-01R-A277-07 | 1 | 32.401201 | 11.207261 | 7.3960277 | 0.13912064 | 17.4434942 |
| TCGA-B2-5635-01B-04R-A277-07 | 2 | 19.002286 | 11.135287 | 5.0459875 | 0.38165281 | 91.4435399 |
| TCGA-B2-5636-01A-02R-1541-07 | 1 | 63.865885 | 9.0981479 | 14.862433 | 0.33990683 | 57.5103919 |
| TCGA-B2-5639-01A-01R-1541-07 | 1 | 50.392706 | 6.363525  | 5.715521  | 2.17454291 | 58.3969902 |
| TCGA-B2-5641-01A-01R-1541-07 | 1 | 38.241537 | 7.9057691 | 6.9730005 | 0.60435539 | 46.021331  |
| TCGA-B2-A4SR-01A-11R-A266-07 | 2 | 55.92329  | 6.7183921 | 7.3895952 | 0.09581659 | 100.816165 |
| TCGA-B4-5377-01A-01R-1503-07 | 1 | 50.968623 | 6.3265698 | 7.8953835 | 0.140633   | 68.3665876 |

|                              |   |           |           |           |            |             |
|------------------------------|---|-----------|-----------|-----------|------------|-------------|
| TCGA-B4-5378-01A-01R-1503-07 | 1 | 33.517196 | 8.450473  | 11.268907 | 0.27833132 | 64.2231216  |
| TCGA-B4-5832-01A-11R-1672-07 | 2 | 13.020694 | 6.9408283 | 2.114629  | 0.64877745 | 86.3380292  |
| TCGA-B4-5834-01A-11R-1672-07 | 1 | 38.706586 | 8.2880733 | 7.086954  | 0.12157743 | 61.8863726  |
| TCGA-B4-5835-01A-11R-1672-07 | 1 | 20.52431  | 5.1208967 | 5.6834414 | 5.22161284 | 62.2047993  |
| TCGA-B4-5836-01A-11R-1672-07 | 1 | 47.080669 | 5.9795859 | 5.3119568 | 0.13509875 | 60.1662453  |
| TCGA-B4-5838-01A-11R-1672-07 | 1 | 48.311689 | 6.5349295 | 5.6596973 | 0.1899604  | 37.9019445  |
| TCGA-B4-5843-01A-11R-1672-07 | 1 | 44.257269 | 7.8164052 | 6.9861042 | 0.26718707 | 61.1930057  |
| TCGA-B4-5844-01A-11R-1672-07 | 1 | 59.585415 | 5.9509166 | 7.8786078 | 0.17074263 | 70.4249476  |
| TCGA-B8-4143-01A-01R-1188-07 | 2 | 25.022934 | 6.0997831 | 7.9158323 | 8.99218019 | 94.6213208  |
| TCGA-B8-4146-01B-11R-1672-07 | 2 | 21.4765   | 10.82007  | 2.6204921 | 0.3086155  | 105.184748  |
| TCGA-B8-4148-01A-02R-1325-07 | 2 | 51.94107  | 5.85117   | 9.5611473 | 0.30712481 | 96.2917899  |
| TCGA-B8-4151-01A-01R-1188-07 | 1 | 60.948366 | 4.9692371 | 5.1101943 | 0.10885818 | 45.0003161  |
| TCGA-B8-4153-01B-11R-1672-07 | 1 | 48.76386  | 3.8564    | 6.5586327 | 0.08350475 | 53.8373441  |
| TCGA-B8-4154-01A-01R-1188-07 | 1 | 38.067728 | 4.9392127 | 3.5249751 | 0.14134816 | 27.5917467  |
| TCGA-B8-4619-01A-02R-1325-07 | 1 | 26.745694 | 5.9925117 | 7.2505493 | 3.98871054 | 68.771468   |
| TCGA-B8-4620-01A-02R-1325-07 | 1 | 41.710872 | 7.316636  | 7.579544  | 2.17274871 | 57.9648663  |
| TCGA-B8-4621-01A-01R-1503-07 | 1 | 30.939274 | 3.2034468 | 8.1620553 | 6.24488102 | 53.425667   |
| TCGA-B8-4622-01A-02R-1277-07 | 1 | 46.390581 | 6.4572913 | 6.809064  | 0.41240241 | 68.0042633  |
| TCGA-B8-5158-01A-01R-1420-07 | 1 | 49.821146 | 4.9205184 | 4.9524038 | 0.70737553 | 63.8754421  |
| TCGA-B8-5159-01A-01R-1420-07 | 1 | 32.647035 | 8.4030443 | 4.8764307 | 0.12755952 | 51.1294044  |
| TCGA-B8-5162-01A-01R-1420-07 | 1 | 38.79852  | 8.3268819 | 9.7293443 | 0.61147531 | 58.4855437  |
| TCGA-B8-5163-01A-01R-1420-07 | 1 | 28.347786 | 8.4533454 | 6.2111306 | 0.22195976 | 65.9678568  |
| TCGA-B8-5164-01A-01R-1420-07 | 1 | 43.926083 | 5.4840255 | 6.8887275 | 0.10982378 | 69.8213052  |
| TCGA-B8-5165-01A-01R-1420-07 | 1 | 36.524807 | 10.065088 | 8.2272885 | 0.57912444 | 58.5430472  |
| TCGA-B8-5545-01A-01R-1672-07 | 1 | 45.221229 | 6.02561   | 11.612947 | 0.79621848 | 64.657519   |
| TCGA-B8-5546-01A-01R-1541-07 | 2 | 54.041164 | 5.5247723 | 13.653287 | 0.26270343 | 74.8969056  |
| TCGA-B8-5549-01A-01R-1541-07 | 1 | 48.5782   | 7.2284939 | 6.910307  | 0.29227378 | 41.4412955  |
| TCGA-B8-5550-01A-01R-1541-07 | 1 | 32.025459 | 6.3334784 | 7.282677  | 0.15391267 | 55.1327337  |
| TCGA-B8-5551-01A-01R-1541-07 | 1 | 41.824547 | 5.9837603 | 7.8093774 | 2.57307983 | 71.3083098  |
| TCGA-B8-5552-01B-11R-1672-07 | 1 | 45.400937 | 7.6253801 | 9.3225172 | 0.39735441 | 62.474982   |
| TCGA-B8-5553-01A-01R-1541-07 | 1 | 43.65767  | 6.729882  | 8.2429396 | 0.48497741 | 53.6197469  |
| TCGA-B8-A54D-01A-21R-A266-07 | 2 | 34.641788 | 4.0971231 | 5.2502994 | 0.10251125 | 99.0982056  |
| TCGA-B8-A54E-01A-11R-A266-07 | 2 | 44.368878 | 3.9494636 | 7.3662898 | 4.28209384 | 81.128377   |
| TCGA-B8-A54F-01A-11R-A266-07 | 2 | 28.609347 | 6.2160772 | 4.8008668 | 0.40400282 | 96.9773414  |
| TCGA-B8-A54G-01A-11R-A266-07 | 2 | 42.749887 | 4.4281137 | 5.6672594 | 0.9404562  | 111.2353303 |
| TCGA-B8-A54H-01A-11R-A33J-07 | 2 | 40.136568 | 5.6701601 | 6.5278112 | 0.08697415 | 89.9318079  |
| TCGA-B8-A54I-01A-21R-A33J-07 | 1 | 32.608587 | 3.2446122 | 4.114379  | 0.80026115 | 69.1945543  |
| TCGA-B8-A54J-01A-11R-A33J-07 | 2 | 45.118085 | 4.4261827 | 7.8563913 | 0.18713346 | 95.7566076  |
| TCGA-B8-A54K-01A-11R-A33J-07 | 1 | 35.914073 | 7.6127498 | 10.766029 | 0.52717246 | 65.1279275  |
| TCGA-B8-A7U6-01A-12R-A37O-07 | 2 | 41.164432 | 4.4977184 | 10.552048 | 0.856569   | 102.48183   |
| TCGA-B8-A8YJ-01A-13R-A39I-07 | 2 | 32.887492 | 4.8929927 | 11.763259 | 0.65286233 | 81.5737771  |
| TCGA-BP-4158-01A-02R-1289-07 | 2 | 36.21581  | 5.88515   | 5.1782971 | 0.143265   | 79.4363281  |
| TCGA-BP-4159-01A-02R-1289-07 | 1 | 31.648098 | 4.9614212 | 5.7047283 | 0.24219001 | 55.3677789  |
| TCGA-BP-4160-01A-02R-1289-07 | 1 | 41.71419  | 7.6846119 | 6.0974066 | 0.15559648 | 54.711528   |
| TCGA-BP-4161-01A-02R-1325-07 | 2 | 45.522532 | 5.6766388 | 5.3900177 | 0.48602969 | 70.7904189  |
| TCGA-BP-4162-01A-02R-1325-07 | 2 | 43.753133 | 6.0100864 | 5.9955014 | 0.23466688 | 83.8543837  |
| TCGA-BP-4163-01A-02R-1325-07 | 1 | 40.621094 | 7.0214399 | 6.0256558 | 2.50533212 | 67.5722197  |
| TCGA-BP-4164-01A-02R-1325-07 | 2 | 51.730575 | 7.1822343 | 4.7234445 | 0.09292201 | 79.8891396  |
| TCGA-BP-4165-01A-02R-1289-07 | 2 | 59.143405 | 4.2723475 | 5.6435747 | 0.21673897 | 72.7567437  |
| TCGA-BP-4166-01A-02R-1289-07 | 1 | 27.992697 | 7.8770848 | 7.1545605 | 0.13490453 | 47.0445874  |
| TCGA-BP-4167-01A-02R-1325-07 | 1 | 35.395938 | 3.5736418 | 5.4194625 | 0.47237742 | 43.1912505  |
| TCGA-BP-4169-01A-02R-1289-07 | 2 | 33.631529 | 5.9564661 | 8.158805  | 0.59287458 | 87.3228323  |

|                              |   |           |           |           |            |            |
|------------------------------|---|-----------|-----------|-----------|------------|------------|
| TCGA-BP-4170-01A-02R-1289-07 | 1 | 46.033135 | 6.2058391 | 7.3951517 | 0.09715427 | 58.6407536 |
| TCGA-BP-4173-01A-02R-1289-07 | 2 | 37.618097 | 5.4397603 | 6.9105775 | 0.41996756 | 91.3350097 |
| TCGA-BP-4174-01A-02R-1289-07 | 1 | 39.270759 | 7.523357  | 4.3516996 | 0.48994377 | 59.9389567 |
| TCGA-BP-4176-01A-02R-1289-07 | 1 | 39.627571 | 6.9500527 | 4.3635309 | 0.53888967 | 67.6329033 |
| TCGA-BP-4177-01A-02R-1420-07 | 1 | 58.945649 | 7.4980157 | 10.727258 | 5.29536005 | 56.3647837 |
| TCGA-BP-4325-01A-02R-1289-07 | 2 | 54.725675 | 5.9218895 | 4.9057824 | 0.1704717  | 88.3939824 |
| TCGA-BP-4326-01A-01R-1289-07 | 2 | 55.436931 | 3.8309407 | 5.9126257 | 0.34058025 | 79.5916675 |
| TCGA-BP-4327-01A-01R-1289-07 | 1 | 61.999635 | 4.7666821 | 5.0014913 | 0.20508782 | 68.8110581 |
| TCGA-BP-4329-01A-02R-1289-07 | 1 | 50.023212 | 6.2425267 | 5.9524321 | 0.209887   | 49.5386005 |
| TCGA-BP-4330-01A-01R-1289-07 | 2 | 45.438244 | 7.4092942 | 6.7583533 | 0.22635994 | 76.5477309 |
| TCGA-BP-4331-01A-01R-1289-07 | 2 | 47.395019 | 5.3437899 | 8.4576005 | 0.26439958 | 78.9112268 |
| TCGA-BP-4332-01A-01R-1289-07 | 2 | 45.952891 | 5.9393926 | 7.4504557 | 0.17165536 | 91.6780294 |
| TCGA-BP-4334-01A-01R-1289-07 | 1 | 21.565043 | 2.9970858 | 5.7315754 | 5.50048206 | 39.262084  |
| TCGA-BP-4335-01A-01R-1289-07 | 2 | 32.939426 | 4.0369522 | 3.8717206 | 0.41631694 | 93.999991  |
| TCGA-BP-4337-01A-01R-1289-07 | 2 | 40.673502 | 3.5874932 | 6.0925378 | 0.66310354 | 77.0130074 |
| TCGA-BP-4338-01A-01R-1289-07 | 1 | 62.000625 | 7.1701332 | 3.6440217 | 0.79649852 | 51.105422  |
| TCGA-BP-4340-01A-01R-1289-07 | 2 | 45.35698  | 3.2522704 | 4.720803  | 0.09676524 | 86.5557593 |
| TCGA-BP-4341-01A-01R-1289-07 | 2 | 45.188369 | 4.2274686 | 4.8146414 | 0.28820275 | 76.5082974 |
| TCGA-BP-4342-01A-01R-1289-07 | 1 | 34.034982 | 6.6462364 | 6.9960768 | 0.62463566 | 62.7192066 |
| TCGA-BP-4343-01A-02R-1289-07 | 1 | 20.386826 | 7.86483   | 4.5341766 | 0.33470201 | 41.2263211 |
| TCGA-BP-4344-01A-01R-1289-07 | 2 | 36.801062 | 6.3537174 | 9.0516309 | 0.18902953 | 81.1875598 |
| TCGA-BP-4345-01A-01R-1289-07 | 2 | 42.359435 | 4.8452454 | 9.2272482 | 0.52021201 | 77.7027544 |
| TCGA-BP-4346-01A-01R-1289-07 | 2 | 44.571586 | 5.0348011 | 6.2138492 | 0.45949754 | 94.1364971 |
| TCGA-BP-4347-01A-01R-1289-07 | 2 | 45.688874 | 3.9935106 | 7.4656547 | 0.13085401 | 79.7031762 |
| TCGA-BP-4349-01A-01R-1289-07 | 2 | 45.1396   | 4.5173577 | 6.6346731 | 0.11006336 | 85.3117613 |
| TCGA-BP-4351-01A-01R-1289-07 | 2 | 36.481945 | 4.1941922 | 5.0616965 | 0.39571923 | 99.1777692 |
| TCGA-BP-4352-01A-01R-1289-07 | 2 | 48.484403 | 5.952599  | 7.4428558 | 12.4523668 | 94.4734301 |
| TCGA-BP-4353-01A-02R-1289-07 | 1 | 25.603935 | 7.5878019 | 5.6398825 | 1.61839417 | 58.3042445 |
| TCGA-BP-4354-01A-02R-1289-07 | 2 | 36.102641 | 6.2476596 | 8.3062906 | 7.29775801 | 125.326887 |
| TCGA-BP-4355-01A-01R-1289-07 | 2 | 39.014781 | 5.2578431 | 7.6690691 | 0.25273567 | 102.023218 |
| TCGA-BP-4756-01A-01R-1289-07 | 2 | 55.716649 | 3.6215004 | 10.801618 | 4.01264328 | 80.049209  |
| TCGA-BP-4758-01A-01R-1289-07 | 1 | 39.089222 | 3.8200966 | 6.2680347 | 0.24436372 | 51.6855374 |
| TCGA-BP-4759-01A-01R-1289-07 | 1 | 34.151162 | 5.7561279 | 7.5634401 | 0.14660912 | 43.9372987 |
| TCGA-BP-4760-01A-02R-1420-07 | 1 | 34.958802 | 7.7599004 | 11.287404 | 5.0635703  | 56.5422326 |
| TCGA-BP-4761-01A-01R-1289-07 | 1 | 61.503669 | 4.9830176 | 4.5425295 | 0.47139269 | 25.5710737 |
| TCGA-BP-4762-01A-02R-1289-07 | 1 | 33.378453 | 9.2478218 | 7.4614138 | 0.50997812 | 46.145675  |
| TCGA-BP-4763-01A-01R-1289-07 | 1 | 30.641622 | 8.509137  | 5.2731559 | 0.39806272 | 46.6811123 |
| TCGA-BP-4765-01A-01R-1289-07 | 2 | 52.717737 | 6.3000791 | 8.103166  | 0.19574005 | 91.6684718 |
| TCGA-BP-4766-01A-01R-1289-07 | 2 | 60.304563 | 6.5740565 | 8.4207626 | 0.27946739 | 75.5779241 |
| TCGA-BP-4768-01A-01R-1289-07 | 1 | 55.994792 | 8.7136446 | 5.9883943 | 0.07869266 | 57.1307346 |
| TCGA-BP-4769-01A-01R-1289-07 | 1 | 79.833647 | 6.0197409 | 12.682667 | 3.89346739 | 59.3276927 |
| TCGA-BP-4770-01A-01R-1503-07 | 2 | 48.218662 | 5.3376187 | 14.931926 | 12.9811351 | 75.3641539 |
| TCGA-BP-4771-01A-01R-1289-07 | 2 | 40.275999 | 4.6999767 | 7.9757758 | 0.35967747 | 87.1790686 |
| TCGA-BP-4774-01A-01R-1289-07 | 2 | 52.095014 | 4.0817116 | 9.4715498 | 0.14997185 | 100.562465 |
| TCGA-BP-4775-01A-01R-1289-07 | 2 | 52.259045 | 5.7325114 | 6.2484035 | 0.21399489 | 79.3728412 |
| TCGA-BP-4776-01A-01R-1289-07 | 1 | 39.527843 | 3.7304278 | 5.8197128 | 0.15019181 | 67.1455561 |
| TCGA-BP-4777-01A-01R-1289-07 | 1 | 35.731118 | 5.180824  | 6.1038836 | 0.17519367 | 71.8073895 |
| TCGA-BP-4781-01A-01R-1305-07 | 1 | 54.724747 | 7.8680821 | 8.6476419 | 1.57282358 | 55.2257658 |
| TCGA-BP-4782-01A-02R-1420-07 | 1 | 44.866518 | 5.2151516 | 7.1887981 | 1.48333606 | 62.1902253 |
| TCGA-BP-4784-01A-01R-1305-07 | 1 | 46.717936 | 7.5149481 | 12.212992 | 4.97926788 | 62.4384774 |
| TCGA-BP-4787-01A-01R-1305-07 | 1 | 26.048555 | 6.6962408 | 5.2683817 | 3.09532482 | 53.1925898 |
| TCGA-BP-4789-01A-01R-1305-07 | 1 | 45.131366 | 8.376158  | 9.3134413 | 0.11213754 | 57.0311005 |

|                              |   |           |           |           |            |            |
|------------------------------|---|-----------|-----------|-----------|------------|------------|
| TCGA-BP-4790-01A-01R-1305-07 | 1 | 47.542726 | 7.8304461 | 10.6368   | 0.19235858 | 46.6218936 |
| TCGA-BP-4795-01A-02R-1420-07 | 1 | 41.506484 | 6.8872785 | 11.910581 | 3.72904263 | 62.1721096 |
| TCGA-BP-4797-01A-01R-1305-07 | 1 | 37.626547 | 7.4254932 | 6.3016009 | 0.34989179 | 47.060208  |
| TCGA-BP-4798-01A-01R-1305-07 | 1 | 33.828439 | 5.6473977 | 7.1279819 | 3.08017285 | 72.5567283 |
| TCGA-BP-4799-01A-01R-1305-07 | 1 | 18.569483 | 5.3404026 | 4.2927234 | 3.16477153 | 35.1703839 |
| TCGA-BP-4801-01A-02R-1420-07 | 1 | 43.735529 | 7.6741649 | 8.2726987 | 0.2145503  | 48.6176176 |
| TCGA-BP-4803-01A-01R-1305-07 | 1 | 43.317436 | 9.2261029 | 7.7308037 | 0.17954822 | 33.7422074 |
| TCGA-BP-4804-01A-02R-1305-07 | 1 | 33.756245 | 5.0463482 | 8.077967  | 0.99056839 | 57.2123216 |
| TCGA-BP-4807-01A-01R-1305-07 | 1 | 44.047619 | 8.0243089 | 6.0488512 | 0.19646513 | 41.0566545 |
| TCGA-BP-4959-01A-01R-1334-07 | 1 | 42.722905 | 5.4967523 | 5.7000062 | 0.85930408 | 47.1252726 |
| TCGA-BP-4960-01A-01R-1334-07 | 1 | 28.184083 | 2.7138676 | 5.6045018 | 1.07734429 | 62.3617735 |
| TCGA-BP-4961-01A-01R-1334-07 | 2 | 38.671722 | 8.5403318 | 9.8523903 | 0.28299502 | 72.8028225 |
| TCGA-BP-4962-01A-01R-1334-07 | 1 | 37.35086  | 4.449897  | 5.2511594 | 0.14119    | 43.4419327 |
| TCGA-BP-4963-01A-01R-1334-07 | 2 | 55.690693 | 5.8030823 | 7.7428889 | 0.77808612 | 87.3113085 |
| TCGA-BP-4964-01A-01R-1334-07 | 1 | 45.173814 | 7.3419088 | 5.8790685 | 0.25834764 | 61.9397392 |
| TCGA-BP-4965-01A-01R-1334-07 | 2 | 45.727473 | 8.0416071 | 6.2056958 | 0.05424895 | 73.5977917 |
| TCGA-BP-4967-01A-01R-1334-07 | 2 | 40.779257 | 4.0316888 | 8.6709149 | 0.17935376 | 77.9019544 |
| TCGA-BP-4968-01A-01R-1334-07 | 2 | 52.114742 | 3.4963216 | 5.840114  | 0.19068025 | 90.0686377 |
| TCGA-BP-4969-01A-01R-1334-07 | 2 | 32.516476 | 3.1674655 | 3.4827203 | 0.16440195 | 97.0304582 |
| TCGA-BP-4970-01A-01R-1334-07 | 1 | 41.346528 | 7.0604585 | 6.0869397 | 1.87301363 | 65.8711022 |
| TCGA-BP-4971-01A-01R-1334-07 | 2 | 25.408846 | 3.7960898 | 4.7513312 | 0.33333893 | 100.900663 |
| TCGA-BP-4972-01A-01R-1334-07 | 1 | 49.698804 | 7.6114111 | 6.5118648 | 0.10436627 | 53.2799205 |
| TCGA-BP-4973-01A-01R-1334-07 | 2 | 40.861194 | 6.5088811 | 4.9153438 | 0.3535353  | 86.7695987 |
| TCGA-BP-4974-01A-01R-1334-07 | 2 | 36.387551 | 5.6726769 | 9.1535324 | 0.22811869 | 108.342459 |
| TCGA-BP-4975-01A-01R-1334-07 | 1 | 50.214207 | 8.5124857 | 6.0238205 | 0.28140065 | 49.171367  |
| TCGA-BP-4976-01A-01R-1334-07 | 1 | 53.753124 | 9.262578  | 8.3580971 | 0.13048745 | 58.1487192 |
| TCGA-BP-4977-01A-01R-1334-07 | 2 | 45.126053 | 6.1874662 | 5.6295306 | 0.92905277 | 79.8403457 |
| TCGA-BP-4981-01A-01R-1334-07 | 1 | 38.47075  | 3.1198577 | 4.1898584 | 0.28359022 | 67.4759446 |
| TCGA-BP-4982-01A-01R-1334-07 | 2 | 45.078159 | 7.1707465 | 7.2749299 | 0.44191806 | 76.505864  |
| TCGA-BP-4983-01A-01R-1334-07 | 2 | 48.731286 | 11.640945 | 6.8260842 | 20.4728668 | 112.969525 |
| TCGA-BP-4985-01A-01R-1334-07 | 1 | 55.416154 | 6.7212638 | 5.0905235 | 17.033842  | 59.0422342 |
| TCGA-BP-4986-01A-01R-1334-07 | 2 | 41.103733 | 8.4748936 | 7.3562411 | 0.26412494 | 81.1168485 |
| TCGA-BP-4987-01A-01R-1334-07 | 2 | 59.443929 | 6.9937186 | 7.6310715 | 0.11616907 | 79.5900311 |
| TCGA-BP-4989-01A-01R-1334-07 | 2 | 27.699192 | 3.8509348 | 5.6434003 | 0.30216881 | 131.675878 |
| TCGA-BP-4991-01A-01R-1334-07 | 2 | 39.795766 | 7.8515093 | 8.9435286 | 0.25738238 | 87.7941676 |
| TCGA-BP-4992-01A-01R-1334-07 | 2 | 25.231113 | 2.0777698 | 3.2530306 | 0.38787138 | 138.687438 |
| TCGA-BP-4993-01A-02R-1420-07 | 1 | 49.223905 | 5.4972143 | 7.9169796 | 0.78993729 | 67.9593293 |
| TCGA-BP-4994-01A-01R-1334-07 | 1 | 35.489973 | 4.858865  | 10.787061 | 4.13667966 | 71.4146306 |
| TCGA-BP-4995-01A-01R-1334-07 | 1 | 43.737861 | 5.9378265 | 9.5141917 | 2.82581191 | 67.8862954 |
| TCGA-BP-4998-01A-01R-1334-07 | 2 | 42.486226 | 6.180323  | 5.8526115 | 0.80913764 | 95.6770483 |
| TCGA-BP-4999-01A-01R-1334-07 | 2 | 38.819832 | 7.1443453 | 8.337803  | 0.11369892 | 82.2325406 |
| TCGA-BP-5000-01A-01R-1334-07 | 1 | 35.306548 | 3.8047344 | 5.1603383 | 0.20335394 | 51.7031983 |
| TCGA-BP-5001-01A-01R-1334-07 | 2 | 37.63349  | 3.0567473 | 4.4830456 | 0.21082038 | 98.1659837 |
| TCGA-BP-5004-01A-01R-1334-07 | 1 | 41.970821 | 5.1533696 | 7.419531  | 0.23757196 | 69.9537233 |
| TCGA-BP-5006-01A-01R-1334-07 | 2 | 50.958472 | 4.7869368 | 8.132162  | 0.1854807  | 71.0911009 |
| TCGA-BP-5007-01A-01R-1334-07 | 2 | 44.023244 | 6.1876948 | 5.5574744 | 0.11778691 | 81.2711408 |
| TCGA-BP-5008-01A-01R-1334-07 | 2 | 42.171102 | 6.3359763 | 8.2933109 | 0.40118496 | 76.863169  |
| TCGA-BP-5009-01A-01R-1334-07 | 2 | 38.922613 | 3.9818203 | 6.1992146 | 0.27439162 | 77.8197151 |
| TCGA-BP-5010-01A-02R-1420-07 | 1 | 33.071136 | 3.2680676 | 7.6966445 | 0.54106006 | 61.5743629 |
| TCGA-BP-5168-01A-01R-1420-07 | 1 | 43.274471 | 5.5875311 | 7.6750128 | 0.05405102 | 57.6879246 |
| TCGA-BP-5169-01A-01R-1426-07 | 1 | 37.103607 | 4.5214114 | 5.6771729 | 10.7027466 | 58.6917974 |
| TCGA-BP-5170-01A-01R-1426-07 | 1 | 41.391089 | 8.0261835 | 6.8674071 | 0.22752222 | 45.4524787 |



|                              |   |           |           |           |            |            |
|------------------------------|---|-----------|-----------|-----------|------------|------------|
| TCGA-BP-5173-01A-01R-1426-07 | 1 | 48.486477 | 6.0215353 | 7.5364308 | 0.09682537 | 63.615669  |
| TCGA-BP-5174-01A-01R-1426-07 | 1 | 43.27881  | 3.5963743 | 5.3721297 | 0.58267544 | 70.9920204 |
| TCGA-BP-5175-01A-01R-1426-07 | 1 | 31.901777 | 2.7736503 | 4.6236615 | 0.18557046 | 48.7201227 |
| TCGA-BP-5176-01A-01R-1426-07 | 1 | 52.919932 | 4.2980568 | 5.8159046 | 0.07944214 | 59.7619429 |
| TCGA-BP-5177-01A-01R-1426-07 | 2 | 40.540975 | 5.0245135 | 8.1892555 | 0.34805188 | 75.6601994 |
| TCGA-BP-5178-01A-01R-1426-07 | 1 | 35.322318 | 3.5071091 | 5.9866642 | 3.10798501 | 54.8594161 |
| TCGA-BP-5180-01A-01R-1426-07 | 1 | 48.5175   | 6.2297297 | 5.9351043 | 0.28233021 | 37.8492438 |
| TCGA-BP-5181-01A-01R-1426-07 | 1 | 58.00915  | 6.3283067 | 4.795727  | 0.23922982 | 54.366075  |
| TCGA-BP-5182-01A-01R-1426-07 | 1 | 42.648062 | 6.0521455 | 7.4985688 | 0.3236     | 53.7416298 |
| TCGA-BP-5183-01A-01R-1426-07 | 1 | 46.05578  | 5.3865741 | 6.1838156 | 0.25943207 | 47.8843777 |
| TCGA-BP-5184-01A-01R-1426-07 | 1 | 45.883446 | 6.7002208 | 8.0112041 | 0.41181285 | 61.451653  |
| TCGA-BP-5185-01A-01R-1426-07 | 1 | 27.297961 | 2.4288076 | 3.458781  | 0.12860708 | 30.7957692 |
| TCGA-BP-5186-01A-01R-1426-07 | 1 | 61.303102 | 6.7392739 | 7.1590435 | 0.35533685 | 68.5179519 |
| TCGA-BP-5187-01A-01R-1426-07 | 1 | 33.293684 | 8.0920237 | 5.4111251 | 0.45026224 | 38.7103236 |
| TCGA-BP-5189-01A-02R-1426-07 | 1 | 34.302148 | 8.0608455 | 6.6029492 | 0.53223349 | 64.0468148 |
| TCGA-BP-5190-01A-01R-1426-07 | 1 | 36.118107 | 3.9592479 | 4.3490049 | 0.11723424 | 60.0496434 |
| TCGA-BP-5191-01A-01R-1426-07 | 1 | 34.427929 | 3.4938355 | 3.1406488 | 0.67735617 | 40.9434155 |
| TCGA-BP-5192-01A-01R-1426-07 | 1 | 71.278337 | 7.1922391 | 7.7013257 | 0.05794074 | 64.2144453 |
| TCGA-BP-5194-01A-02R-1426-07 | 1 | 42.585734 | 8.4907068 | 7.572342  | 0.31304044 | 65.7735361 |
| TCGA-BP-5195-01A-02R-1426-07 | 1 | 42.360448 | 6.4101968 | 9.5034997 | 0.30340938 | 57.4569852 |
| TCGA-BP-5196-01A-01R-1426-07 | 2 | 49.943282 | 7.185758  | 8.3576    | 0.82092703 | 77.1822637 |
| TCGA-BP-5198-01A-01R-1426-07 | 1 | 33.836163 | 5.4604701 | 8.4914473 | 1.99287042 | 67.7970653 |
| TCGA-BP-5199-01A-01R-1426-07 | 2 | 45.421257 | 5.4050368 | 8.5662911 | 0.26572864 | 87.7075031 |
| TCGA-BP-5200-01A-01R-1426-07 | 1 | 50.358067 | 4.7860046 | 8.6457361 | 0.18595847 | 69.6046795 |
| TCGA-BP-5201-01A-01R-1426-07 | 1 | 48.608993 | 3.8460005 | 7.4888979 | 0.19187185 | 70.925675  |
| TCGA-BP-5202-01A-02R-1426-07 | 1 | 58.591762 | 6.1683642 | 9.4352503 | 0.31877531 | 60.4891601 |
| TCGA-CJ-4634-01A-02R-1325-07 | 2 | 49.372493 | 7.2859645 | 7.789961  | 0.56703874 | 78.7764989 |
| TCGA-CJ-4635-01A-02R-1305-07 | 2 | 42.804481 | 7.7893833 | 7.7822154 | 0.63091469 | 80.9399162 |
| TCGA-CJ-4636-01A-02R-1325-07 | 2 | 30.887114 | 4.7582639 | 4.9137626 | 0.83438224 | 85.1801241 |
| TCGA-CJ-4637-01A-02R-1325-07 | 2 | 48.161625 | 6.1352473 | 5.9270932 | 1.26090718 | 89.1554154 |
| TCGA-CJ-4638-01A-02R-1325-07 | 1 | 46.619038 | 3.0496917 | 3.61737   | 0.45394345 | 69.1519848 |
| TCGA-CJ-4639-01A-02R-1325-07 | 1 | 41.589868 | 7.9919994 | 5.6654282 | 0.20287551 | 64.404085  |
| TCGA-CJ-4640-01A-02R-1325-07 | 1 | 43.465885 | 4.2530775 | 7.5864072 | 0.56178084 | 59.4888852 |
| TCGA-CJ-4641-01A-02R-1325-07 | 2 | 35.954027 | 5.8453365 | 5.8719677 | 1.59119897 | 75.0943826 |
| TCGA-CJ-4642-01B-01R-1305-07 | 1 | 32.13002  | 6.3796724 | 7.9781088 | 4.34878541 | 58.4165571 |
| TCGA-CJ-4643-01A-02R-1325-07 | 2 | 48.735584 | 6.4468904 | 7.0184287 | 0.16989277 | 82.195844  |
| TCGA-CJ-4644-01A-02R-1325-07 | 1 | 43.098378 | 6.5604483 | 5.778789  | 0.06567405 | 53.1517924 |
| TCGA-CJ-4868-01A-01R-1305-07 | 1 | 51.507665 | 5.7540543 | 7.4590938 | 8.1587594  | 65.7465301 |
| TCGA-CJ-4869-01A-02R-1426-07 | 1 | 44.571296 | 4.441261  | 5.7721868 | 0.30092244 | 56.9233124 |
| TCGA-CJ-4870-01A-01R-1305-07 | 1 | 40.585445 | 4.9308053 | 6.3883646 | 0.08559176 | 43.0409207 |
| TCGA-CJ-4871-01A-01R-1305-07 | 1 | 36.218988 | 6.634693  | 5.4872805 | 0.35981762 | 51.3446338 |
| TCGA-CJ-4872-01A-01R-1305-07 | 1 | 36.068093 | 5.3440503 | 5.546706  | 0.32937853 | 56.6657383 |
| TCGA-CJ-4873-01A-01R-1305-07 | 1 | 38.791063 | 3.2452091 | 4.6911204 | 0.47543865 | 75.3928436 |
| TCGA-CJ-4874-01A-01R-1305-07 | 1 | 40.60613  | 6.151564  | 4.8849213 | 0.16271333 | 54.209817  |
| TCGA-CJ-4875-01A-01R-1305-07 | 2 | 25.524412 | 4.0558    | 4.275305  | 0.10849187 | 76.0504985 |
| TCGA-CJ-4876-01A-01R-1305-07 | 2 | 66.366362 | 2.8590654 | 7.7146775 | 0.09307613 | 89.8871177 |
| TCGA-CJ-4878-01A-01R-1305-07 | 2 | 48.728316 | 4.7063512 | 5.2214215 | 0.19258644 | 125.935824 |
| TCGA-CJ-4881-01A-01R-1305-07 | 2 | 33.887703 | 5.0055589 | 5.641707  | 0.2489471  | 91.2200889 |
| TCGA-CJ-4882-01A-02R-1426-07 | 1 | 52.375186 | 3.3085089 | 7.2240927 | 0.66557096 | 61.619597  |
| TCGA-CJ-4884-01A-01R-1305-07 | 2 | 34.118452 | 4.7485458 | 5.1445561 | 0.4018713  | 89.3515527 |
| TCGA-CJ-4885-01A-01R-1305-07 | 1 | 48.356409 | 3.8409736 | 4.9869384 | 0.12242533 | 67.1852208 |
| TCGA-CJ-4886-01A-01R-1305-07 | 1 | 41.797193 | 6.6771773 | 6.9617483 | 0.1754685  | 69.6202687 |

|                              |   |           |           |           |            |            |
|------------------------------|---|-----------|-----------|-----------|------------|------------|
| TCGA-CJ-4887-01A-01R-1305-07 | 2 | 34.56068  | 3.6221352 | 5.6807563 | 0.30558062 | 81.0809386 |
| TCGA-CJ-4888-01A-01R-1305-07 | 2 | 43.463907 | 3.567146  | 7.640063  | 0.43699882 | 76.5233939 |
| TCGA-CJ-4889-01A-01R-1305-07 | 1 | 43.811501 | 5.3744066 | 11.222929 | 0.37379504 | 68.366257  |
| TCGA-CJ-4890-01A-01R-1305-07 | 1 | 30.047824 | 5.4480153 | 8.5714092 | 0.80587314 | 69.5259326 |
| TCGA-CJ-4891-01A-01R-1305-07 | 1 | 50.797334 | 2.8930472 | 3.7998031 | 2.93476802 | 59.6813029 |
| TCGA-CJ-4892-01A-01R-1305-07 | 1 | 51.039743 | 5.0494307 | 5.5415097 | 0.3717572  | 67.2465078 |
| TCGA-CJ-4893-01A-01R-1305-07 | 1 | 45.530482 | 6.1235059 | 6.2904109 | 0.10523877 | 60.6040896 |
| TCGA-CJ-4894-01A-01R-1305-07 | 2 | 40.121673 | 5.1247561 | 7.7368988 | 0.12405178 | 86.1508358 |
| TCGA-CJ-4895-01A-01R-1305-07 | 1 | 62.005259 | 5.5877987 | 7.2285776 | 1.63710029 | 67.7189944 |
| TCGA-CJ-4897-01A-03R-1426-07 | 1 | 35.496023 | 7.2094971 | 5.9731337 | 0.11838564 | 46.566882  |
| TCGA-CJ-4899-01A-01R-1334-07 | 2 | 47.782445 | 6.6837664 | 8.6616622 | 0.53767578 | 92.5344178 |
| TCGA-CJ-4900-01A-01R-1334-07 | 2 | 46.947366 | 4.1524617 | 6.6855821 | 3.53733997 | 96.1472645 |
| TCGA-CJ-4901-01A-01R-1426-07 | 1 | 36.861748 | 5.5286333 | 4.5061495 | 2.97059078 | 62.5799025 |
| TCGA-CJ-4902-01A-01R-1426-07 | 2 | 34.813844 | 5.9327277 | 7.5831992 | 0.50453009 | 73.6333114 |
| TCGA-CJ-4903-01A-01R-1426-07 | 1 | 41.41436  | 5.1280218 | 5.7881256 | 0.28155069 | 63.6793221 |
| TCGA-CJ-4904-01A-02R-1426-07 | 1 | 47.201679 | 7.0409705 | 7.9203807 | 0.16284605 | 66.298082  |
| TCGA-CJ-4905-01A-02R-1426-07 | 1 | 48.178736 | 8.2759782 | 9.4393095 | 0.15069637 | 65.2193485 |
| TCGA-CJ-4907-01A-01R-1426-07 | 1 | 44.709743 | 7.0503518 | 8.53936   | 0.31283615 | 56.7809053 |
| TCGA-CJ-4908-01A-01R-1426-07 | 2 | 44.59521  | 7.2891789 | 8.8889617 | 0.4558292  | 84.0817354 |
| TCGA-CJ-4912-01A-01R-1426-07 | 1 | 26.864066 | 6.6760142 | 6.4709156 | 0.81945471 | 72.2342536 |
| TCGA-CJ-4916-01A-01R-1426-07 | 2 | 47.407644 | 4.5454167 | 5.805622  | 0.13677679 | 81.6612337 |
| TCGA-CJ-4918-01A-01R-1426-07 | 1 | 33.352764 | 6.9899671 | 7.7707942 | 0.75435608 | 57.3026592 |
| TCGA-CJ-4920-01A-01R-1426-07 | 1 | 48.691973 | 5.3011576 | 7.4526139 | 3.83310799 | 66.3271389 |
| TCGA-CJ-5671-01A-11R-1541-07 | 1 | 31.987844 | 5.2398426 | 7.9851579 | 3.48215356 | 52.5254693 |
| TCGA-CJ-5672-01A-11R-1541-07 | 1 | 39.618869 | 4.6629447 | 6.1944722 | 0.31639735 | 52.675841  |
| TCGA-CJ-5675-01A-11R-1541-07 | 1 | 50.985762 | 5.1195386 | 6.6744069 | 0.20588409 | 62.1040252 |
| TCGA-CJ-5676-01A-11R-1541-07 | 1 | 32.884469 | 3.9173554 | 7.6894725 | 1.50423499 | 55.6764005 |
| TCGA-CJ-5677-01A-11R-1541-07 | 1 | 27.63148  | 5.8945802 | 6.9283137 | 0.37222253 | 60.9346235 |
| TCGA-CJ-5678-01A-11R-1541-07 | 2 | 43.42505  | 4.3246304 | 5.4262946 | 0.19037479 | 71.9331657 |
| TCGA-CJ-5679-01A-11R-1541-07 | 1 | 48.45556  | 3.2971298 | 5.9790806 | 3.11067663 | 56.2683321 |
| TCGA-CJ-5680-01A-11R-1541-07 | 1 | 61.941601 | 6.2180873 | 6.8381885 | 3.71030721 | 61.629486  |
| TCGA-CJ-5681-01A-11R-1541-07 | 2 | 68.435063 | 5.7546374 | 7.0991207 | 5.3709856  | 76.7963183 |
| TCGA-CJ-5682-01A-11R-1541-07 | 1 | 42.633528 | 4.918733  | 7.6597506 | 0.41337337 | 55.8456866 |
| TCGA-CJ-5683-01A-11R-1541-07 | 1 | 50.525313 | 5.4123124 | 7.7175936 | 1.59830874 | 58.5206    |
| TCGA-CJ-5684-01A-11R-1541-07 | 1 | 47.488207 | 5.9884846 | 8.2899267 | 0.24397205 | 56.6072257 |
| TCGA-CJ-5686-01A-11R-1672-07 | 1 | 46.977142 | 6.1289627 | 6.1553458 | 0.40567905 | 57.4654985 |
| TCGA-CJ-5689-01A-11R-1541-07 | 1 | 48.687167 | 4.3471832 | 8.2724486 | 0.84251224 | 60.583324  |
| TCGA-CJ-6027-01A-11R-1672-07 | 1 | 47.503082 | 5.5412656 | 5.3995695 | 0.72985489 | 69.302755  |
| TCGA-CJ-6028-01A-11R-1672-07 | 1 | 44.425115 | 8.5417114 | 5.9880348 | 0.94334875 | 54.8124119 |
| TCGA-CJ-6030-01A-11R-1672-07 | 1 | 39.953929 | 5.0457152 | 5.8906975 | 1.20557327 | 71.0215428 |
| TCGA-CJ-6031-01A-11R-1672-07 | 1 | 34.256382 | 5.9605529 | 7.3748415 | 0.29660952 | 51.6027258 |
| TCGA-CJ-6032-01A-11R-1672-07 | 1 | 46.64541  | 6.2893545 | 8.0088563 | 0.10265982 | 60.2541595 |
| TCGA-CJ-6033-01A-11R-1672-07 | 1 | 47.541024 | 5.1601666 | 6.7859918 | 0.34820438 | 60.2059492 |
| TCGA-CW-5580-01A-01R-1672-07 | 1 | 42.990533 | 8.5746168 | 7.3841651 | 3.03397154 | 49.4982423 |
| TCGA-CW-5581-01A-02R-1541-07 | 1 | 46.761174 | 7.5158232 | 6.3519575 | 0.1460986  | 47.2337742 |
| TCGA-CW-5583-01A-02R-1541-07 | 1 | 49.107212 | 9.282507  | 6.6864698 | 0.15889839 | 58.7584317 |
| TCGA-CW-5584-01A-01R-1541-07 | 1 | 43.293632 | 7.2733989 | 7.8516502 | 0.17511769 | 46.4418369 |
| TCGA-CW-5585-01A-01R-1541-07 | 1 | 61.835775 | 7.488104  | 7.4453959 | 0.06399257 | 50.3047652 |
| TCGA-CW-5587-01A-01R-1541-07 | 1 | 38.28519  | 7.0941219 | 5.9860932 | 0.26607224 | 54.0813915 |
| TCGA-CW-5588-01A-01R-1541-07 | 1 | 34.892246 | 10.441887 | 7.7764323 | 0.67748184 | 36.6841646 |
| TCGA-CW-5589-01A-01R-1541-07 | 1 | 48.067952 | 7.6543985 | 7.6896368 | 0.41328645 | 52.387994  |
| TCGA-CW-5590-01A-01R-1541-07 | 1 | 50.761708 | 4.8976477 | 8.865829  | 0.21180579 | 64.9374272 |

|                              |   |           |           |           |            |            |
|------------------------------|---|-----------|-----------|-----------|------------|------------|
| TCGA-CW-5591-01A-01R-1541-07 | 1 | 28.284755 | 6.5478598 | 10.916867 | 5.21131297 | 66.6310691 |
| TCGA-CW-6087-01A-11R-1672-07 | 2 | 31.167782 | 7.9193487 | 10.278083 | 14.5354263 | 86.036821  |
| TCGA-CW-6088-01A-11R-1672-07 | 2 | 52.434551 | 6.0790855 | 7.4725006 | 0.22244196 | 70.786584  |
| TCGA-CW-6090-01A-11R-1672-07 | 1 | 47.438551 | 7.8938526 | 6.5684202 | 0.96572538 | 55.4120836 |
| TCGA-CW-6093-01A-11R-1672-07 | 2 | 61.191562 | 8.0993494 | 10.706428 | 0.26696811 | 92.32453   |
| TCGA-CW-6097-01A-11R-1672-07 | 1 | 39.28879  | 8.4575286 | 8.1571645 | 1.91135335 | 64.4436001 |
| TCGA-CZ-4853-01A-01R-1426-07 | 1 | 41.020662 | 7.4526645 | 4.4214322 | 0.14564029 | 51.0903625 |
| TCGA-CZ-4854-01A-01R-1305-07 | 2 | 38.304033 | 5.9781483 | 5.8484436 | 1.35064877 | 88.5656708 |
| TCGA-CZ-4856-01A-02R-1426-07 | 1 | 45.065759 | 6.7509418 | 5.9754221 | 0.13415489 | 47.115981  |
| TCGA-CZ-4857-01A-01R-1305-07 | 1 | 36.062873 | 8.0920215 | 6.4620269 | 10.0362204 | 70.4068581 |
| TCGA-CZ-4858-01A-01R-1305-07 | 2 | 40.097954 | 7.5368466 | 8.9019809 | 4.20322988 | 88.3381029 |
| TCGA-CZ-4859-01A-02R-1426-07 | 1 | 69.281558 | 6.6018549 | 5.8562773 | 0.04932331 | 53.728319  |
| TCGA-CZ-4860-01A-01R-1305-07 | 1 | 30.848697 | 11.956571 | 7.442825  | 4.80602147 | 47.2608628 |
| TCGA-CZ-4861-01A-01R-1305-07 | 1 | 32.231438 | 8.9447836 | 5.1253477 | 7.12820197 | 54.7653535 |
| TCGA-CZ-4862-01A-01R-1305-07 | 2 | 41.771911 | 5.0742329 | 9.269045  | 2.02453727 | 92.7952843 |
| TCGA-CZ-4863-01A-01R-1503-07 | 2 | 42.461008 | 6.355898  | 6.4420427 | 0.21084168 | 77.9432341 |
| TCGA-CZ-4864-01A-01R-1503-07 | 2 | 33.116657 | 6.1427239 | 6.418015  | 0.22035462 | 92.7311673 |
| TCGA-CZ-4865-01A-02R-1503-07 | 2 | 50.829081 | 5.6196368 | 7.9940751 | 0.2615231  | 76.2975618 |
| TCGA-CZ-4866-01A-01R-1503-07 | 2 | 36.613581 | 6.4069983 | 4.9192638 | 0.17539149 | 89.7095807 |
| TCGA-CZ-5451-01A-01R-1503-07 | 1 | 36.346976 | 6.2378373 | 5.2426422 | 0.13656154 | 54.1224999 |
| TCGA-CZ-5452-01A-01R-1503-07 | 2 | 50.674618 | 4.6063807 | 6.0248137 | 0.20249816 | 74.8216566 |
| TCGA-CZ-5453-01A-01R-1503-07 | 2 | 54.233898 | 3.6075911 | 6.3629226 | 0.07031557 | 77.8955966 |
| TCGA-CZ-5454-01A-01R-1503-07 | 1 | 38.76002  | 7.1796178 | 4.5988992 | 0.28535973 | 65.8168777 |
| TCGA-CZ-5455-01A-01R-1503-07 | 2 | 41.188119 | 7.9976688 | 5.8516249 | 0.20574914 | 78.8446893 |
| TCGA-CZ-5456-01A-01R-1503-07 | 1 | 52.116313 | 8.00331   | 6.8372892 | 6.69280003 | 49.0415645 |
| TCGA-CZ-5457-01A-01R-1503-07 | 1 | 38.573554 | 5.2712111 | 6.678934  | 0.18581841 | 59.5903118 |
| TCGA-CZ-5458-01A-01R-1503-07 | 1 | 44.653591 | 6.8438281 | 6.5640564 | 0.52486852 | 59.0092469 |
| TCGA-CZ-5459-01A-01R-1503-07 | 1 | 39.313782 | 5.184773  | 6.1800031 | 0.27960214 | 58.0446572 |
| TCGA-CZ-5460-01A-01R-1503-07 | 1 | 45.152616 | 4.0327829 | 6.4784547 | 0.4181175  | 67.8832715 |
| TCGA-CZ-5461-01A-01R-1503-07 | 1 | 38.521431 | 7.3765368 | 6.72139   | 0.14035206 | 52.2022942 |
| TCGA-CZ-5462-01A-01R-1503-07 | 1 | 54.795832 | 8.351463  | 5.1928728 | 0.66815533 | 60.4475866 |
| TCGA-CZ-5463-01A-01R-1503-07 | 2 | 39.577003 | 6.2979398 | 4.9165043 | 0.07889176 | 71.7511753 |
| TCGA-CZ-5464-01A-01R-1503-07 | 2 | 37.19323  | 7.2906224 | 5.9437525 | 0.33857396 | 75.3589953 |
| TCGA-CZ-5465-01A-01R-1503-07 | 2 | 57.792673 | 8.9088637 | 6.8904392 | 0.12052198 | 69.2055653 |
| TCGA-CZ-5466-01A-01R-1503-07 | 1 | 38.228199 | 9.5759369 | 7.6029244 | 1.29489894 | 46.2412015 |
| TCGA-CZ-5467-01A-01R-1503-07 | 1 | 48.151276 | 7.5324345 | 7.84511   | 0.10887935 | 60.3471437 |
| TCGA-CZ-5468-01A-01R-1503-07 | 1 | 47.718843 | 5.9754686 | 5.8876853 | 9.68208253 | 70.9564026 |
| TCGA-CZ-5469-01A-01R-1503-07 | 1 | 46.553285 | 5.181802  | 6.8809423 | 13.3512437 | 61.1376939 |
| TCGA-CZ-5470-01A-01R-1503-07 | 2 | 42.025404 | 5.8071134 | 5.2822828 | 1.08383776 | 86.7469715 |
| TCGA-CZ-5982-01A-11R-1672-07 | 2 | 57.518754 | 7.4930561 | 8.2857616 | 0.27396721 | 90.5261208 |
| TCGA-CZ-5984-01A-11R-1672-07 | 1 | 50.088666 | 6.1131352 | 3.7889687 | 0.17345031 | 57.275178  |
| TCGA-CZ-5985-01A-11R-1672-07 | 1 | 52.156744 | 7.3538436 | 4.8542044 | 0.36683389 | 54.0058186 |
| TCGA-CZ-5986-01A-11R-1672-07 | 2 | 53.038059 | 5.6570702 | 6.7090557 | 0.10741645 | 69.7468136 |
| TCGA-CZ-5987-01A-11R-1672-07 | 1 | 51.137014 | 4.1177721 | 5.9253992 | 0.18318683 | 56.7792645 |
| TCGA-CZ-5988-01A-11R-1672-07 | 1 | 45.69891  | 5.2592459 | 6.8830149 | 0.69030605 | 63.6862202 |
| TCGA-CZ-5989-01A-11R-1672-07 | 2 | 13.620815 | 10.134819 | 2.6395641 | 0.12799742 | 113.905482 |
| TCGA-DV-5565-01A-01R-1541-07 | 2 | 31.86553  | 4.5642449 | 10.047331 | 0.23683573 | 83.0014018 |
| TCGA-DV-5566-01A-01R-1541-07 | 2 | 59.240117 | 4.7558198 | 9.3992244 | 0.5433656  | 73.8239103 |
| TCGA-DV-5567-01A-01R-1541-07 | 1 | 39.028383 | 8.4535396 | 14.748198 | 0.30469197 | 54.6130041 |
| TCGA-DV-5568-01A-01R-1541-07 | 2 | 46.997538 | 4.5205006 | 7.41203   | 0.3812577  | 71.8791627 |
| TCGA-DV-5569-01A-01R-1541-07 | 2 | 44.988692 | 6.6840391 | 7.850238  | 0.25869897 | 72.9170183 |
| TCGA-DV-5573-01A-01R-1541-07 | 2 | 44.227744 | 5.916008  | 7.6620012 | 1.55553013 | 86.7191937 |

|                              |   |           |           |           |            |            |
|------------------------------|---|-----------|-----------|-----------|------------|------------|
| TCGA-DV-5574-01A-01R-1541-07 | 2 | 40.520239 | 5.7691842 | 7.6420571 | 0.78877471 | 74.0483015 |
| TCGA-DV-5575-01A-01R-1541-07 | 1 | 57.457689 | 4.6884078 | 6.9118047 | 0.3562835  | 68.0523024 |
| TCGA-DV-5576-01A-01R-1541-07 | 1 | 46.347081 | 7.1019585 | 10.017656 | 1.66126197 | 70.3506488 |
| TCGA-DV-A4VX-01A-11R-A266-07 | 2 | 20.368589 | 4.0224035 | 3.8755195 | 3.20584372 | 78.663191  |
| TCGA-DV-A4VZ-01A-11R-A266-07 | 2 | 37.838759 | 3.4311103 | 10.907323 | 12.40416   | 119.630689 |
| TCGA-DV-A4W0-01A-11R-A266-07 | 2 | 54.245719 | 4.9382895 | 6.4190265 | 0.42635891 | 91.390935  |
| TCGA-DV-A4W0-05A-11R-A266-07 | 2 | 38.929807 | 6.5494936 | 10.934251 | 6.33461229 | 99.8562693 |
| TCGA-EU-5904-01A-11R-1672-07 | 1 | 39.343463 | 6.6652272 | 5.9970931 | 0.17353057 | 64.0342884 |
| TCGA-EU-5905-01A-11R-1672-07 | 1 | 28.15349  | 6.9435287 | 6.3379076 | 0.43890094 | 42.5170286 |
| TCGA-EU-5906-01A-11R-1672-07 | 1 | 47.95905  | 8.1187756 | 7.4905474 | 0.14931285 | 55.3592289 |
| TCGA-EU-5907-01A-11R-1672-07 | 1 | 58.293447 | 7.0730369 | 5.6061723 | 0.17149638 | 51.77907   |
| TCGA-G6-A5PC-01A-11R-A33J-07 | 1 | 43.277544 | 2.9102459 | 3.3673067 | 0.15467565 | 46.8867652 |
| TCGA-G6-A8L6-01A-11R-A37O-07 | 1 | 44.87267  | 4.0729638 | 7.1373279 | 0.26661942 | 68.2388228 |
| TCGA-G6-A8L7-01A-11R-A37O-07 | 1 | 31.229159 | 2.7241334 | 5.3812775 | 0.2745868  | 69.282177  |
| TCGA-G6-A8L8-01A-21R-A37O-07 | 2 | 51.323763 | 4.2293818 | 6.3148385 | 0.17180069 | 92.569908  |
| TCGA-GK-A6C7-01A-11R-A33J-07 | 2 | 41.839754 | 5.4191266 | 10.745004 | 0.16327451 | 75.6168473 |
| TCGA-MM-A563-01A-11R-A266-07 | 2 | 48.997948 | 3.851311  | 7.7754908 | 0.62359986 | 81.842168  |
| TCGA-MM-A564-01A-11R-A266-07 | 2 | 47.208153 | 5.0194379 | 6.0070916 | 0.10762056 | 72.3245938 |
| TCGA-MM-A84U-01A-11R-A37O-07 | 1 | 45.940519 | 3.3994126 | 5.0732217 | 3.6574319  | 60.9826317 |
| TCGA-MW-A4EC-01A-11R-A266-07 | 2 | 56.207554 | 4.9521417 | 7.4604375 | 0.0858671  | 71.9907265 |
| TCGA-T7-A92I-01A-11R-A37O-07 | 2 | 35.929667 | 4.3256089 | 11.222906 | 0.08569596 | 89.0281879 |

| IGF2BP1   | YTHDC1     | YTHDF2     | YTHDF1     | METTL14   | ZC3H13    | HNRNPC   | YTHDF3   | IGF2BP3    |
|-----------|------------|------------|------------|-----------|-----------|----------|----------|------------|
| 0.1952889 | 14.7776784 | 18.3082281 | 22.8490755 | 3.858316  | 4.7223248 | 43.43576 | 9.414466 | 0.02090103 |
| 0.2329979 | 10.4550799 | 16.6230303 | 17.1790451 | 3.0581913 | 5.3246167 | 45.30886 | 9.545742 | 0.00840569 |
| 0.0052118 | 10.1673113 | 21.6765986 | 15.8415979 | 4.6734182 | 5.4296165 | 47.2731  | 16.9161  | 0.01952304 |
| 1.1365986 | 11.8102715 | 24.8529596 | 22.0632294 | 4.8750349 | 5.9513924 | 54.11193 | 21.9658  | 0.02101872 |
| 0.0290449 | 12.5344813 | 22.9356828 | 21.6462341 | 3.395876  | 7.7619324 | 45.12476 | 27.28617 | 0.42085174 |
| 1.3840795 | 11.9582775 | 21.4792573 | 15.9737773 | 3.9001651 | 8.1670871 | 37.91165 | 19.44502 | 1.1246791  |
| 0.2918414 | 11.5380746 | 11.8780633 | 20.6668727 | 3.9772202 | 8.7362078 | 42.45119 | 23.41773 | 0.01848206 |
| 2.0055476 | 9.1418285  | 14.3739065 | 14.6937896 | 3.5604408 | 7.8537975 | 32.84839 | 20.78995 | 0.02597835 |
| 0.1654856 | 12.548728  | 17.1522312 | 19.0562403 | 4.7439873 | 9.9956527 | 37.10003 | 20.4109  | 1.61988677 |
| 2.2038598 | 11.1156644 | 14.5001059 | 19.1529726 | 2.8211835 | 3.9639838 | 29.19426 | 18.96532 | 2.78886203 |
| 0.3596506 | 21.7731809 | 16.6005059 | 15.1746223 | 6.003621  | 9.8522574 | 46.26213 | 19.49728 | 0.01994406 |
| 0.097933  | 14.0813403 | 14.5800081 | 13.6923088 | 4.1848179 | 8.2021041 | 41.67757 | 12.97893 | 0.017469   |
| 1.5060591 | 14.1641155 | 13.5935905 | 11.1286304 | 4.3570444 | 8.574514  | 35.54305 | 13.45126 | 0.06908048 |
| 0.0270543 | 13.6960675 | 17.3540594 | 15.2063562 | 4.4599858 | 7.9704976 | 34.67789 | 18.4713  | 0.02895514 |
| 0.8109396 | 13.6625722 | 17.8497976 | 18.7797103 | 3.9342211 | 7.8955272 | 53.75401 | 14.80434 | 0.01491734 |
| 0.594414  | 18.1968523 | 13.066258  | 13.1605692 | 3.6925456 | 7.940951  | 49.80153 | 12.15559 | 0.01988058 |
| 0.0967456 | 9.54336288 | 11.2520998 | 20.7222375 | 3.8722214 | 7.4182631 | 42.72607 | 18.33755 | 0.16786533 |
| 1.3086513 | 13.2674032 | 18.8742013 | 16.6833243 | 4.1267766 | 5.1180247 | 50.95996 | 17.06943 | 0.0232377  |
| 0.0841758 | 14.3595095 | 18.0161352 | 15.8084669 | 4.4502468 | 8.7825614 | 39.72102 | 18.57822 | 0.03118506 |
| 0.0612103 | 9.72618638 | 11.1453442 | 10.9273876 | 2.8732279 | 3.4370603 | 39.09162 | 11.07248 | 0.03457526 |
| 0.5834259 | 14.1433012 | 15.6661638 | 13.4445355 | 3.7929883 | 5.9377359 | 53.81496 | 13.42207 | 0.03684457 |
| 0.4698912 | 4.73968424 | 14.8704502 | 16.3237085 | 1.5086282 | 2.2238619 | 46.93069 | 8.982813 | 1.32354136 |
| 1.6121888 | 10.7350586 | 13.53851   | 19.515714  | 3.7586549 | 6.8821879 | 36.25121 | 14.95349 | 2.59391005 |
| 0.1772686 | 16.1873471 | 16.8987148 | 13.107314  | 4.1336267 | 7.5222297 | 45.29226 | 13.20444 | 0.01600081 |
| 0.2932664 | 19.1258347 | 15.6340278 | 12.954366  | 4.6266578 | 9.3946631 | 40.8533  | 15.57092 | 0.04345918 |
| 1.0038999 | 15.7832607 | 17.7594109 | 14.9972106 | 4.519859  | 7.6250667 | 59.03598 | 15.92928 | 0.01578119 |
| 0.018996  | 15.8126397 | 18.5220168 | 14.4837017 | 3.6253284 | 6.606539  | 52.43093 | 16.34905 | 0.09226993 |
| 1.0171816 | 9.69580417 | 15.0440579 | 17.695366  | 2.9898688 | 3.7175502 | 44.85612 | 14.32963 | 1.60653754 |
| 0.5852488 | 15.4734612 | 21.7101679 | 17.7712855 | 4.7624095 | 7.1947672 | 50.32419 | 18.00337 | 0.02036974 |
| 0.4354099 | 12.2326381 | 18.9715475 | 15.3371691 | 4.4122853 | 6.977991  | 47.66031 | 14.43925 | 0.02291816 |
| 0.0588859 | 11.2405096 | 16.7067352 | 27.2899093 | 3.3872976 | 3.8900512 | 71.32685 | 15.10768 | 0.01750648 |
| 0.0170237 | 15.5134826 | 21.598707  | 22.4370414 | 5.5563261 | 6.2390025 | 68.84633 | 15.9019  | 0.03643959 |
| 1.6285999 | 16.3979956 | 14.920346  | 14.4948393 | 2.9397982 | 8.0123071 | 50.06125 | 15.0375  | 0.01826755 |
| 0.0120962 | 16.6474388 | 16.6429787 | 15.3951796 | 4.9259868 | 7.4112224 | 41.23058 | 16.49975 | 0.03452297 |
| 0.0086711 | 16.5472451 | 19.4033363 | 21.0562001 | 4.9126582 | 11.67265  | 45.08902 | 12.73136 | 0.03712122 |
| 0.027565  | 10.8905609 | 14.5325039 | 20.2408441 | 5.7283775 | 10.120648 | 40.9975  | 16.14382 | 0.02802672 |
| 0.0242668 | 4.99357445 | 9.17310654 | 16.2769126 | 2.6990001 | 1.2674297 | 31.97555 | 13.22969 | 0.07235018 |
| 0.0416585 | 17.3395678 | 20.9449547 | 16.9998633 | 4.5638634 | 11.850137 | 41.94962 | 18.66171 | 0.06163295 |
| 0.0313917 | 11.078593  | 17.3596846 | 15.5298209 | 3.1392217 | 7.9979108 | 34.46265 | 15.20029 | 0.09705899 |
| 0.5194252 | 16.1612537 | 14.3029562 | 16.2091467 | 5.3077046 | 6.5078539 | 42.1024  | 13.75474 | 0.02860044 |
| 0.9555423 | 12.2354198 | 14.9132653 | 17.060609  | 3.8001105 | 9.4021344 | 41.99818 | 15.25985 | 0.06509877 |
| 0.3920293 | 11.521382  | 17.1811925 | 16.2613277 | 3.5234821 | 2.6079967 | 64.49501 | 7.060124 | 0.01068978 |
| 0.6384779 | 15.1647746 | 14.6409074 | 16.2158596 | 4.6889695 | 7.830152  | 39.076   | 15.79362 | 0.01638702 |
| 1.9476254 | 11.5607448 | 16.5270439 | 15.0483418 | 3.6477844 | 7.1295687 | 40.14583 | 15.14782 | 1.53094653 |
| 0.2838322 | 13.8968435 | 17.9875128 | 15.6298092 | 3.3242011 | 5.4135725 | 38.36201 | 9.539822 | 0.01730363 |
| 0.6196248 | 13.3359633 | 24.2723753 | 21.7610121 | 4.5563519 | 7.75933   | 51.00722 | 14.47227 | 0.02399595 |
| 0.5213176 | 14.5261751 | 17.3448584 | 13.4950509 | 4.0802571 | 7.774236  | 41.14226 | 12.46833 | 0.00724606 |
| 0.5495128 | 15.7169677 | 16.428373  | 20.7548667 | 4.8992775 | 10.052252 | 47.83437 | 8.869089 | 0.04491119 |
| 1.3634063 | 16.876138  | 22.1052244 | 20.7938498 | 4.8293435 | 8.7725421 | 43.3833  | 15.73772 | 0.01228284 |
| 0.3071095 | 12.8027697 | 16.6339395 | 17.6191189 | 3.0658201 | 5.8113931 | 40.23445 | 10.49518 | 0.01998776 |

|           |            |            |            |           |           |          |          |            |
|-----------|------------|------------|------------|-----------|-----------|----------|----------|------------|
| 0.2048235 | 14.3010947 | 15.747534  | 17.7387009 | 4.562443  | 5.3188941 | 54.72505 | 10.43926 | 0.00481791 |
| 0.0503251 | 16.4956033 | 16.5068743 | 16.5834333 | 4.6735164 | 8.8999018 | 44.53812 | 12.11793 | 0.00897683 |
| 0.02948   | 10.7531168 | 19.0994012 | 16.8297103 | 3.6647314 | 7.6326003 | 40.76426 | 14.39411 | 0.02412751 |
| 1.7279978 | 7.77982702 | 17.2881036 | 11.1139296 | 3.1731457 | 5.0916682 | 44.19757 | 14.99332 | 0.03319455 |
| 0.1899073 | 6.56535148 | 12.9042324 | 11.8725761 | 1.3720496 | 3.4781573 | 31.40808 | 7.886805 | 0.06663952 |
| 0.0378956 | 3.70373591 | 9.13293977 | 12.9825747 | 2.0121896 | 2.2194461 | 38.42489 | 18.21733 | 0.01419538 |
| 0.003505  | 10.8467514 | 24.8121321 | 16.1425898 | 4.573674  | 7.8659698 | 81.5896  | 21.0483  | 0.0112539  |
| 0.0726988 | 9.31647197 | 20.3851656 | 15.0249865 | 3.9001085 | 4.4001464 | 54.17713 | 13.56091 | 0.02146393 |
| 0.066425  | 8.87980016 | 21.1670993 | 14.1285808 | 3.9114986 | 6.5475568 | 59.71348 | 19.96922 | 0.08246692 |
| 0.0312791 | 9.54532464 | 10.9457349 | 19.3774143 | 4.8822505 | 6.203597  | 29.18797 | 24.62569 | 0.10322025 |
| 0.5256554 | 11.087223  | 15.0398351 | 12.9741719 | 3.1646977 | 5.8071705 | 53.87117 | 14.96563 | 0.01136543 |
| 0.5958491 | 5.02338025 | 13.3778724 | 7.78958787 | 1.9130272 | 4.0349905 | 34.29236 | 11.56286 | 0.81780016 |
| 0.0069419 | 10.3546554 | 15.3947477 | 20.8082154 | 4.3633479 | 3.4004054 | 33.14831 | 13.14083 | 0.16159549 |
| 0.0014526 | 10.3153395 | 20.0210593 | 14.6910153 | 4.9942745 | 10.036419 | 42.11445 | 23.29705 | 0.21143733 |
| 0.0964219 | 9.44493041 | 15.8181776 | 21.9320219 | 3.2852254 | 4.3413183 | 40.37355 | 29.42213 | 0.01965652 |
| 0.0023825 | 2.28992124 | 6.73717056 | 3.40549101 | 1.4073587 | 1.5496746 | 25.53204 | 15.27189 | 0          |
| 1.1157334 | 10.1720723 | 25.7841077 | 15.6556065 | 3.634694  | 5.6093337 | 46.37353 | 17.06515 | 0.00620863 |
| 0.0148167 | 4.85583043 | 19.1133689 | 7.43446685 | 1.707881  | 2.3841883 | 46.42257 | 14.77836 | 0          |
| 0.3135325 | 12.1281444 | 13.6446895 | 15.3743951 | 2.6742079 | 4.1509721 | 37.80812 | 7.616895 | 0.03085627 |
| 0.1597851 | 6.6033273  | 13.0304702 | 13.2276538 | 1.6352817 | 4.1302296 | 27.57066 | 7.831525 | 0.20411106 |
| 0.8136981 | 11.5082276 | 21.1747875 | 15.4728839 | 4.3411947 | 4.283191  | 57.24491 | 21.38567 | 0.10678245 |
| 0.3238109 | 8.71862959 | 22.2368738 | 14.5328773 | 3.6383271 | 7.7973035 | 46.52716 | 22.07358 | 0.04950893 |
| 0.4788044 | 7.47769901 | 11.8293924 | 8.47629374 | 1.9263313 | 3.1855368 | 57.4045  | 15.73226 | 0.02890722 |
| 0.0660461 | 12.0035647 | 18.4638584 | 14.2949008 | 3.8004461 | 6.7475974 | 49.22938 | 14.08657 | 0.04302665 |
| 0.1553514 | 12.9142795 | 21.1056302 | 19.9305439 | 4.2586494 | 7.6696293 | 53.2274  | 17.92428 | 0.02375238 |
| 0.0637736 | 9.82842668 | 12.5379719 | 18.394673  | 4.2729346 | 8.7538477 | 31.75825 | 22.87749 | 0.02873874 |
| 0.010427  | 4.02309286 | 9.47230498 | 11.0241753 | 2.2482397 | 1.6760739 | 22.44776 | 6.919665 | 0.19130817 |
| 1.4757042 | 14.6398606 | 15.6537673 | 13.8205028 | 3.4926319 | 5.6804282 | 42.47714 | 14.02561 | 0.0269652  |
| 5.3131152 | 10.9984916 | 18.6923513 | 20.9004603 | 2.8348789 | 53.806695 | 68.70498 | 19.42635 | 2.87972737 |
| 2.0055594 | 9.25469353 | 16.9395575 | 15.3501503 | 2.6246282 | 7.7545282 | 55.45248 | 13.51863 | 5.21910146 |
| 0.430554  | 7.79319995 | 15.7254877 | 12.9683189 | 2.1356255 | 2.5653063 | 39.86796 | 10.69604 | 0.31680387 |
| 0.381059  | 13.3485426 | 21.5434766 | 18.0104807 | 4.6142378 | 7.7526108 | 50.24127 | 18.71645 | 0.05222252 |
| 1.1074198 | 8.00787271 | 17.3645339 | 10.5959604 | 2.9971684 | 5.6383576 | 53.21706 | 14.69291 | 0.11778677 |
| 1.2334719 | 11.1878009 | 24.5301569 | 23.3437652 | 3.1090317 | 5.6035455 | 60.52809 | 8.056281 | 0.22714928 |
| 0.0923568 | 9.70643802 | 19.8529062 | 17.3981312 | 1.4793674 | 5.3162091 | 44.6978  | 18.40082 | 0.09884594 |
| 0.1565674 | 10.5241243 | 29.4302506 | 18.9884839 | 2.9035344 | 5.7940212 | 66.63633 | 18.2011  | 2.0804995  |
| 1.6751147 | 10.1936751 | 18.2851026 | 23.5191623 | 4.8952723 | 5.481794  | 55.47239 | 16.03435 | 0.43534586 |
| 0.5589842 | 7.37467863 | 18.1903476 | 15.6932428 | 2.3174889 | 4.6907541 | 42.54085 | 9.381406 | 0.31213539 |
| 0.4953988 | 10.4279782 | 24.363464  | 19.4918541 | 3.4636502 | 6.0558014 | 52.77998 | 14.01741 | 0.40888804 |
| 0.0255699 | 11.4035601 | 17.7103824 | 13.3911635 | 3.3724747 | 8.7860311 | 42.21023 | 15.20077 | 0.19938472 |
| 0.5535786 | 13.0201642 | 12.6439783 | 14.0322098 | 3.0147733 | 4.7265814 | 46.07135 | 11.9163  | 0.31332768 |
| 0.4133025 | 5.6893256  | 13.3283799 | 10.2162614 | 1.7927415 | 2.8694953 | 29.79889 | 8.879079 | 0.41742131 |
| 3.736372  | 16.7624416 | 20.942563  | 18.3787281 | 3.4385118 | 5.9201199 | 40.96357 | 14.93667 | 0.0159557  |
| 2.4602267 | 5.57360719 | 15.41479   | 13.2594447 | 1.9981484 | 2.8589087 | 50.05327 | 12.25463 | 0.92139055 |
| 1.4460167 | 8.23177389 | 10.6324528 | 16.52593   | 2.5412445 | 2.6004117 | 43.56051 | 15.99709 | 0.46565461 |
| 0.0137009 | 13.1835775 | 11.4431271 | 13.087614  | 2.6341383 | 5.1590407 | 42.57102 | 8.754822 | 0.01221965 |
| 0.6364383 | 11.6862387 | 11.2013669 | 17.0524307 | 3.1769233 | 5.0672727 | 45.70443 | 6.948781 | 0.0376676  |
| 0.4185657 | 12.5579347 | 18.7004026 | 15.9606741 | 2.8341476 | 5.5938949 | 51.34853 | 12.25069 | 0.09573658 |
| 1.1310219 | 9.66133366 | 12.7155667 | 15.3908522 | 2.054152  | 4.7113669 | 30.16152 | 7.336033 | 0.59863536 |
| 0.0942009 | 19.7753583 | 22.2559235 | 17.8416291 | 1.712772  | 4.1922857 | 36.18408 | 10.13849 | 0.07332338 |
| 3.8539933 | 12.7647729 | 13.3008092 | 10.594639  | 3.6333057 | 6.5972505 | 43.37641 | 12.12383 | 0.00893777 |
| 0.7439005 | 11.2018196 | 14.614797  | 20.912887  | 2.2400418 | 6.4413211 | 52.5101  | 11.45199 | 1.63583308 |

|           |            |            |            |           |           |          |          |            |
|-----------|------------|------------|------------|-----------|-----------|----------|----------|------------|
| 0.3353401 | 14.4865409 | 17.8393837 | 15.3593597 | 3.5417543 | 7.397807  | 52.44867 | 12.58573 | 0.00470177 |
| 0.9071051 | 7.78458291 | 10.9438182 | 11.3753195 | 2.4015938 | 3.9420233 | 33.01687 | 9.51907  | 0.17798736 |
| 0.0170806 | 14.467927  | 15.6474185 | 16.1855924 | 3.4554776 | 7.1632251 | 53.3454  | 12.1001  | 0.02376493 |
| 0.0741122 | 10.5549129 | 15.5209342 | 17.2924628 | 2.7491915 | 4.9835996 | 35.86285 | 11.84541 | 0.14982561 |
| 1.4313189 | 8.16358739 | 12.6107413 | 27.9430882 | 1.839809  | 3.8377563 | 26.24849 | 8.864225 | 0.34947974 |
| 0.1433519 | 6.26233333 | 13.2958387 | 13.8724004 | 1.4862562 | 4.1079487 | 26.58886 | 6.27957  | 0.21690994 |
| 0.7298695 | 11.4609405 | 22.7463427 | 16.0877833 | 4.2758168 | 7.3191995 | 49.97993 | 16.90932 | 0.0305585  |
| 0.3950311 | 14.5607485 | 18.8283903 | 15.5615234 | 4.6085485 | 6.9524644 | 51.20719 | 14.11747 | 0.04065258 |
| 0.0693702 | 9.6247572  | 24.1951642 | 20.873635  | 3.5973562 | 6.6964469 | 46.7811  | 16.93977 | 0.05810426 |
| 2.7736197 | 13.4040839 | 16.6684598 | 18.5670712 | 3.5126158 | 5.409707  | 41.8596  | 13.10978 | 0.08354127 |
| 0.0760627 | 9.78847223 | 16.904643  | 14.740921  | 2.7999735 | 4.6910339 | 33.64853 | 12.08534 | 0.02504833 |
| 0.0336357 | 10.4036615 | 10.4228769 | 14.4329809 | 3.8721382 | 8.7155554 | 24.25726 | 18.18705 | 0.1019972  |
| 0.0606831 | 9.98596195 | 17.2789612 | 13.8985976 | 2.4375077 | 7.574791  | 37.15277 | 14.21428 | 0.46665486 |
| 0.2360909 | 7.61300516 | 14.3614388 | 11.0485468 | 2.9053743 | 4.7584747 | 46.43824 | 9.996436 | 0.08698791 |
| 0.8702299 | 13.0159724 | 22.0461701 | 19.3952547 | 3.9625754 | 7.1224594 | 42.43337 | 15.37472 | 0.45918902 |
| 0.3083018 | 6.44305851 | 14.7531321 | 10.7916187 | 1.9569926 | 3.2431929 | 34.08451 | 9.795619 | 0.01399846 |
| 0.0216863 | 5.08926154 | 15.8431383 | 14.2425178 | 1.1706935 | 3.1079134 | 25.72517 | 10.03246 | 0.02707831 |
| 0.6417068 | 5.55129147 | 14.4602982 | 13.6925707 | 1.3470914 | 2.8494097 | 29.36103 | 9.348497 | 0.00266199 |
| 0.0684705 | 7.82480066 | 13.4505078 | 12.3232205 | 2.5516957 | 4.7752577 | 37.41371 | 8.909378 | 0.01357062 |
| 0.8728174 | 7.04079685 | 15.025693  | 13.408476  | 2.1775826 | 3.7983529 | 50.76448 | 11.08724 | 0.3992503  |
| 0.118328  | 13.4458763 | 16.9343482 | 17.0033455 | 3.4149313 | 6.8601595 | 44.28436 | 11.23186 | 0.00938089 |
| 0.7828573 | 16.9766243 | 22.3400981 | 18.1046384 | 5.8610396 | 8.978459  | 56.05305 | 22.08525 | 0.00960851 |
| 0.3316028 | 13.509717  | 12.835658  | 15.7965995 | 2.1843915 | 4.5842474 | 35.31104 | 8.707807 | 0.00266844 |
| 0.2541724 | 10.6601086 | 24.8305344 | 18.4542415 | 3.189409  | 7.3856525 | 46.32879 | 16.78821 | 1.49873713 |
| 0.9151463 | 16.6496651 | 19.1171149 | 18.2459757 | 3.8961667 | 6.6527684 | 56.9233  | 13.95249 | 0.02647152 |
| 2.1044583 | 15.8534605 | 21.2971494 | 17.811583  | 3.90892   | 7.6281295 | 53.11441 | 17.92304 | 0.04682332 |
| 0.0272036 | 15.6488508 | 18.3488266 | 18.8231479 | 6.1028519 | 9.1470613 | 44.41866 | 14.3741  | 0.01455748 |
| 0.950847  | 12.7216289 | 18.1446336 | 15.3156744 | 3.6081091 | 6.1968636 | 36.68802 | 13.61196 | 0.05669794 |
| 3.2159459 | 13.8481808 | 16.8253829 | 15.9244985 | 3.2595241 | 6.9417322 | 46.86322 | 11.48207 | 0.01565214 |
| 0.1602187 | 9.33695495 | 19.4151757 | 16.0344935 | 3.3460504 | 6.905433  | 47.34875 | 13.15647 | 0.14356127 |
| 0.9548656 | 10.923727  | 14.4968705 | 12.8760018 | 2.4283224 | 6.333585  | 36.89979 | 9.317204 | 0.93431536 |
| 0.0152041 | 6.77504251 | 11.3305737 | 13.3657626 | 4.3277721 | 5.9422234 | 31.89842 | 18.67096 | 0.47422449 |
| 2.2265365 | 12.2713103 | 10.2032462 | 18.076499  | 1.7130667 | 7.0825479 | 52.61409 | 9.855887 | 1.77430083 |
| 0.0377394 | 9.41304018 | 10.4805097 | 14.4026334 | 2.0013881 | 3.8479226 | 34.10164 | 7.123017 | 0.0121173  |
| 0.1491424 | 13.0899037 | 14.819561  | 14.5970178 | 2.7443391 | 5.5641912 | 48.55807 | 9.802304 | 0.06282973 |
| 0.7325763 | 12.4239844 | 13.7911478 | 13.5037532 | 3.144794  | 4.8105676 | 42.06211 | 9.27174  | 0.0675488  |
| 1.7059407 | 11.0225799 | 13.9147796 | 16.6525579 | 3.1423321 | 3.4314375 | 25.96094 | 11.7909  | 1.31508924 |
| 1.1001925 | 11.653159  | 17.5808671 | 14.6821198 | 3.5126269 | 6.5607649 | 40.54076 | 14.94934 | 0.05854944 |
| 0.6508585 | 6.94791286 | 24.662294  | 13.3545836 | 4.0005678 | 7.6036088 | 44.87006 | 26.69727 | 1.5403127  |
| 0.971063  | 10.3136145 | 21.3827604 | 12.5973985 | 3.0634029 | 6.4559294 | 44.79217 | 22.52934 | 2.48643326 |
| 9.2973986 | 8.72727297 | 13.2923336 | 24.3098412 | 2.0105825 | 8.0601317 | 80.92567 | 12.99777 | 3.23375427 |
| 1.3555309 | 17.3145665 | 26.4299133 | 21.2911048 | 4.780703  | 4.5915721 | 39.23544 | 15.48128 | 0.01632375 |
| 0.1243654 | 10.8217264 | 16.8353805 | 18.4664718 | 2.4370362 | 5.9471731 | 34.30268 | 13.40674 | 0.00211276 |
| 0.4721606 | 15.3563301 | 13.2542066 | 14.9382417 | 4.0304933 | 6.014222  | 43.51803 | 11.32569 | 0.01754637 |
| 2.1095097 | 11.0875601 | 21.7563368 | 18.8497513 | 4.5012518 | 8.4298915 | 42.93368 | 19.22733 | 0.01808813 |
| 0.9526329 | 14.8645181 | 14.4876519 | 15.7397622 | 3.1259523 | 6.2496256 | 38.82347 | 10.16047 | 0.02967554 |
| 0.9881618 | 10.2145312 | 19.1565796 | 15.5668513 | 1.9544413 | 3.5673846 | 43.73868 | 10.42891 | 1.27420733 |
| 0.8196052 | 13.5432583 | 15.8829192 | 13.3256641 | 3.6120328 | 7.9387166 | 48.18348 | 15.69158 | 0.08734754 |
| 5.5186095 | 8.73658989 | 13.9288691 | 14.6894622 | 2.4051273 | 5.6235839 | 62.90132 | 11.15695 | 3.33344534 |
| 0.1956913 | 16.7483595 | 21.6496156 | 17.1382962 | 5.7805714 | 10.296417 | 46.08925 | 21.23682 | 0.02750235 |
| 0.0585562 | 18.3907632 | 15.816243  | 14.8934196 | 4.0353369 | 9.1794335 | 38.93424 | 15.85786 | 0.0483458  |
| 0.0530364 | 17.6539736 | 14.6806183 | 12.7716617 | 4.1819639 | 8.1671118 | 56.51577 | 11.80792 | 0.02459722 |

|           |            |            |            |           |           |          |          |            |
|-----------|------------|------------|------------|-----------|-----------|----------|----------|------------|
| 1.0622137 | 8.40043711 | 17.8274262 | 11.9888174 | 1.8996719 | 7.1583474 | 38.19371 | 12.34481 | 1.3702897  |
| 0.0208418 | 6.03938676 | 10.9412194 | 13.49812   | 3.1318535 | 5.2154991 | 23.95112 | 10.58749 | 0.28328844 |
| 0.0255929 | 13.4905262 | 18.4641381 | 15.4613171 | 5.9137961 | 10.534523 | 52.22914 | 17.08682 | 0.02934757 |
| 0.0313174 | 14.4921094 | 17.2458703 | 16.180737  | 4.5289492 | 8.7164245 | 41.89293 | 14.36002 | 0.03746107 |
| 0.7735622 | 9.62527368 | 12.943371  | 11.862813  | 2.6983731 | 5.5744463 | 41.15235 | 8.111472 | 0.00499747 |
| 1.598041  | 10.7882068 | 16.8064522 | 14.5452705 | 4.2639172 | 6.9561547 | 50.64591 | 10.96534 | 0.00952295 |
| 0.0878168 | 5.91998564 | 15.373838  | 13.0150089 | 1.4717329 | 3.3524953 | 28.68562 | 9.228927 | 0.02741287 |
| 2.7224486 | 15.7875162 | 17.1019333 | 8.61773386 | 4.6462198 | 12.775469 | 46.47499 | 15.39954 | 0.01914992 |
| 1.2871141 | 13.0968001 | 19.414688  | 16.5676084 | 3.7323245 | 9.6735794 | 41.94363 | 13.20641 | 0.01679938 |
| 0.128029  | 15.4198249 | 16.5206433 | 15.5919469 | 3.4670379 | 9.9876648 | 39.64863 | 18.54441 | 0.02131494 |
| 1.4542193 | 11.9207279 | 20.4566935 | 18.2820969 | 3.3674356 | 6.2089455 | 44.88356 | 11.086   | 0.01086868 |
| 0.5730074 | 16.3481942 | 23.8564242 | 19.4050602 | 4.9973356 | 10.266149 | 55.58897 | 17.40877 | 0.01099047 |
| 2.7702377 | 11.6270363 | 15.3316107 | 11.0562769 | 3.1545025 | 6.9442527 | 38.68261 | 10.43661 | 0.01395895 |
| 0.1488943 | 16.7444639 | 18.3762534 | 16.7659632 | 4.0599033 | 7.2898744 | 60.45747 | 9.66951  | 0.02439121 |
| 0.0762925 | 9.52816707 | 17.0767604 | 14.6361731 | 3.0734723 | 4.8170555 | 50.27726 | 8.148233 | 0.05325192 |
| 0.1004966 | 11.7713976 | 17.3420573 | 22.1097279 | 3.0602242 | 7.7599324 | 40.52469 | 11.534   | 0.26563487 |
| 0.4989847 | 9.99756286 | 22.1901907 | 21.072455  | 3.5781508 | 6.6983021 | 45.20552 | 15.21047 | 0.01745243 |
| 0.7618433 | 16.8339382 | 18.8716946 | 15.5207871 | 5.5422776 | 8.136102  | 58.60901 | 16.58194 | 0.03026903 |
| 0.0671183 | 9.0420348  | 20.1088511 | 14.6522276 | 3.2668742 | 4.3919788 | 52.38511 | 8.362344 | 0          |
| 2.0213202 | 8.94721933 | 13.4569987 | 12.2726261 | 3.239127  | 8.3911888 | 34.8953  | 15.32558 | 0.76792673 |
| 0.2094201 | 7.7015717  | 33.4213272 | 23.4819802 | 1.0713013 | 0.5847039 | 18.91891 | 5.654509 | 0.00546669 |
| 2.19784   | 9.16581706 | 10.966565  | 16.9012642 | 3.2255977 | 7.1209209 | 35.57435 | 14.59107 | 0.02922068 |
| 0.0178118 | 12.6188673 | 18.3661899 | 15.3637903 | 4.583063  | 8.1097419 | 41.89933 | 15.79564 | 0.0508354  |
| 0.5471311 | 11.2759569 | 14.0512904 | 14.0259498 | 2.9850609 | 7.4526636 | 48.84263 | 13.15702 | 0.1288262  |
| 0.0708412 | 11.346313  | 16.8566026 | 29.6378802 | 2.7938541 | 5.5846992 | 42.0732  | 7.886595 | 0.03913219 |
| 0.1409359 | 14.3007938 | 14.9518055 | 16.7187228 | 3.4652516 | 10.708286 | 40.03132 | 19.8214  | 0.07039124 |
| 0.5167152 | 14.5998549 | 16.6450937 | 13.6085614 | 3.6893229 | 8.7962624 | 40.06804 | 13.48008 | 0.04472961 |
| 0.1492565 | 16.0703621 | 16.5503424 | 14.5232633 | 4.5122062 | 9.7270354 | 44.77184 | 16.301   | 0.03042735 |
| 0.3199371 | 12.9112451 | 17.8010836 | 16.4249992 | 3.4839589 | 7.0228026 | 43.51838 | 10.68378 | 0.04515383 |
| 0.0051632 | 16.2434269 | 21.5190229 | 19.1440856 | 5.412298  | 10.428021 | 55.90498 | 11.831   | 0.00736795 |
| 0.4833959 | 15.6479304 | 24.1720236 | 17.4228413 | 5.8386908 | 10.111988 | 50.88276 | 20.53419 | 0.01942308 |
| 0.041155  | 9.09538829 | 11.8462266 | 19.1105875 | 5.2355062 | 11.096072 | 27.50582 | 25.64559 | 0.35971375 |
| 0.0317793 | 12.233092  | 17.5469404 | 15.9968327 | 9.7413597 | 7.8326754 | 29.97157 | 28.89062 | 0.67740918 |
| 0.005709  | 14.2874704 | 11.6295551 | 18.4475398 | 9.8291587 | 16.439281 | 37.13269 | 41.01668 | 0.59878729 |
| 0.2730666 | 10.2781126 | 19.3368532 | 14.5644321 | 4.5336368 | 7.0530985 | 57.77823 | 16.68871 | 0.05845057 |
| 0.2348382 | 12.7487836 | 24.2517259 | 16.00924   | 7.1061916 | 8.3925021 | 53.84503 | 20.6521  | 0.18279154 |
| 0.0466989 | 18.1234183 | 20.9107553 | 17.8347791 | 8.3997382 | 14.126846 | 60.45181 | 25.75196 | 0.31487424 |
| 0.0834325 | 9.72679498 | 18.5186021 | 13.6800764 | 3.0332024 | 6.2381906 | 40.85057 | 11.53587 | 0.06337041 |
| 1.7267528 | 7.38582065 | 15.9540575 | 14.2387589 | 2.9197782 | 2.8791269 | 65.1316  | 14.43428 | 0.04126143 |
| 1.1188241 | 13.653223  | 14.6177225 | 14.8785594 | 4.4774895 | 8.3162998 | 43.70106 | 14.49526 | 0.04860437 |
| 0.0244519 | 15.5519938 | 19.3176546 | 14.2889652 | 4.496795  | 8.5908336 | 37.59519 | 16.45216 | 0.0221438  |
| 1.0471895 | 13.4584022 | 20.665308  | 14.8221473 | 4.0900329 | 10.621029 | 36.44888 | 18.4087  | 0.07247455 |
| 1.0217773 | 10.9803193 | 19.4895635 | 8.62937288 | 7.0616081 | 3.7447496 | 41.81417 | 19.58182 | 0.13485722 |
| 1.7122954 | 18.9847626 | 19.3516398 | 13.74552   | 7.2760922 | 12.678944 | 32.23317 | 25.45438 | 0.42407383 |
| 1.3646082 | 14.1561072 | 16.4019911 | 13.3397506 | 3.9134539 | 8.0137683 | 37.0258  | 11.91299 | 0.01018472 |
| 1.7762881 | 13.7002521 | 18.1903547 | 9.70967415 | 7.5088202 | 5.7434868 | 34.79173 | 21.39717 | 0.08223561 |
| 2.3159768 | 18.910823  | 17.5811863 | 9.79455995 | 6.990296  | 11.071848 | 33.26005 | 27.6011  | 0.21232829 |
| 0.0258085 | 14.6763777 | 23.5103552 | 18.7247662 | 4.585518  | 12.856856 | 43.52831 | 17.0979  | 0.00849903 |
| 2.013247  | 11.0207084 | 23.0346583 | 13.6672393 | 3.5337321 | 10.018778 | 43.44162 | 18.37264 | 1.15967337 |
| 1.8016086 | 10.8233332 | 20.2716322 | 13.5733837 | 3.6541492 | 8.9069301 | 35.09624 | 15.56123 | 0.09473782 |
| 0.2345077 | 20.2533187 | 17.0864225 | 17.9130964 | 5.2176952 | 11.368071 | 51.55162 | 10.71717 | 0.01332662 |
| 0.0013538 | 14.5462477 | 24.5414316 | 19.6309197 | 5.2617936 | 10.303622 | 53.92154 | 24.49078 | 0.02752875 |



|           |            |            |            |           |           |          |          |            |
|-----------|------------|------------|------------|-----------|-----------|----------|----------|------------|
| 0.0497827 | 19.1807665 | 17.1270626 | 15.2184295 | 5.6564042 | 10.65065  | 48.41856 | 18.87545 | 0.01165512 |
| 0.5611297 | 13.1203209 | 23.506921  | 23.3826879 | 6.3916272 | 9.0358088 | 32.18638 | 83.22058 | 1.71674033 |
| 0.9710888 | 18.1159509 | 14.9939798 | 12.7944433 | 4.2068932 | 8.4613575 | 57.39037 | 14.68773 | 0.00824857 |
| 1.6794151 | 10.0138531 | 14.0628024 | 37.5407851 | 3.9241649 | 3.7232775 | 54.45759 | 16.4532  | 4.63326899 |
| 0.0068514 | 13.4345379 | 20.3286219 | 15.4037437 | 3.7470884 | 8.6393797 | 39.14973 | 17.28324 | 0.5371239  |
| 0.0147066 | 8.70875998 | 20.9327255 | 14.0589026 | 3.1124235 | 6.3667377 | 32.31302 | 16.16269 | 0.05621402 |
| 0.8441786 | 16.1385361 | 21.1302496 | 15.2164938 | 4.2894285 | 8.5598916 | 45.89918 | 18.93693 | 0.02554863 |
| 0.115767  | 14.6936174 | 19.5474029 | 18.4165877 | 4.2824242 | 10.812311 | 48.84261 | 17.66661 | 0.0247802  |
| 0.0925599 | 9.81371469 | 11.1808978 | 10.5039826 | 2.8321342 | 4.5031176 | 48.78066 | 10.45531 | 2.07042404 |
| 0.4312674 | 23.4227465 | 22.9957043 | 12.8435369 | 11.494017 | 7.9183759 | 49.77499 | 46.57164 | 0.07581329 |
| 0.0339253 | 16.125434  | 25.0647503 | 21.9996698 | 5.5895474 | 9.8832088 | 52.95208 | 19.68221 | 0.02562982 |
| 0.0067903 | 10.071379  | 21.1680451 | 18.0819017 | 3.9841334 | 3.8202573 | 67.27775 | 17.61691 | 0.01695737 |
| 0.2558732 | 11.1479322 | 18.1301121 | 15.5525349 | 3.1812832 | 4.8898542 | 45.89134 | 12.05125 | 0          |
| 0         | 7.76023277 | 16.6618076 | 10.6138188 | 3.1369902 | 2.6974829 | 65.23815 | 15.99407 | 0.00914389 |
| 0.0449463 | 9.30284107 | 11.2459473 | 12.4567164 | 4.0078817 | 8.0202869 | 24.94388 | 18.01444 | 0.07320227 |
| 1.3240943 | 11.6684863 | 16.3859411 | 14.032395  | 4.9049167 | 6.35891   | 51.63168 | 16.27239 | 2.1404331  |
| 1.3471745 | 8.54623324 | 12.6483641 | 17.8319929 | 2.3391534 | 5.6819585 | 31.41154 | 12.5985  | 0.02929921 |
| 1.6393244 | 11.1212653 | 15.7213003 | 16.9753291 | 3.7245307 | 7.5906062 | 39.30764 | 15.25834 | 0.44312539 |
| 0.6719104 | 8.61951822 | 16.3586116 | 12.2371554 | 2.3856709 | 9.1284109 | 37.5534  | 16.51372 | 0.07428274 |
| 1.7084742 | 11.2098526 | 16.8870514 | 12.9404829 | 4.732488  | 10.790285 | 40.88425 | 19.2712  | 0.02868851 |
| 0.5315841 | 9.47232068 | 18.8044646 | 14.3412303 | 3.1863561 | 8.858922  | 48.74939 | 17.23655 | 0.18377944 |
| 0.1898156 | 10.293227  | 17.4066541 | 14.7825171 | 3.5078432 | 8.6289427 | 46.77895 | 17.58848 | 0.52447861 |
| 0.0512329 | 13.2635758 | 15.2617518 | 16.318777  | 5.5709434 | 11.526892 | 42.55521 | 16.34534 | 0.06266588 |
| 0.6773353 | 12.8645716 | 19.985252  | 13.1625064 | 4.7014638 | 10.794978 | 46.5142  | 20.90987 | 0.01933137 |
| 0.2995233 | 12.540363  | 21.9559245 | 17.1967218 | 5.2122255 | 11.156833 | 49.75582 | 14.42664 | 0.07577072 |
| 0.9363931 | 12.028619  | 22.1722207 | 22.515319  | 4.0236306 | 9.9409921 | 53.56045 | 17.60638 | 0.00782958 |
| 2.819117  | 10.503431  | 17.5768296 | 15.6258051 | 3.7298032 | 7.784545  | 35.1736  | 15.78243 | 0.03412661 |
| 0.7564223 | 8.19047593 | 14.2210619 | 12.5908343 | 3.2054502 | 8.0634527 | 33.20325 | 15.13604 | 0.05449029 |
| 0.2586027 | 9.14343233 | 18.3776524 | 18.4367586 | 2.6702959 | 7.2229757 | 44.49176 | 15.04437 | 0.89157081 |
| 0.8505998 | 13.7887562 | 22.2432384 | 17.7453857 | 4.5467592 | 9.8413809 | 45.84079 | 16.77386 | 0.03481318 |
| 1.0584443 | 9.19889954 | 20.4423416 | 15.815996  | 3.344039  | 7.6225391 | 34.54865 | 16.90424 | 0.02975865 |
| 0.0222029 | 15.4675748 | 14.9051071 | 17.0693065 | 3.2420691 | 6.194466  | 38.86646 | 13.69748 | 0.08079391 |
| 0.4029645 | 7.20526692 | 26.1687724 | 22.2194858 | 3.9450161 | 5.5297867 | 55.65787 | 19.38494 | 0.92673336 |
| 0.3281359 | 22.000868  | 13.9522329 | 11.65051   | 4.4255515 | 10.404926 | 49.24261 | 10.91549 | 0.01404765 |
| 0.1488925 | 14.9924294 | 14.5853515 | 16.3934724 | 3.903552  | 6.3948445 | 57.37223 | 11.37737 | 0.0159354  |
| 0.0060281 | 16.8684076 | 16.1997082 | 15.7983857 | 2.9347313 | 8.1187697 | 40.65826 | 12.41994 | 0.01129032 |
| 0.8695657 | 7.65760055 | 10.7005824 | 14.3695659 | 1.6433114 | 2.8463916 | 23.81363 | 6.31874  | 0.55249743 |
| 0.0782014 | 11.6592971 | 17.8783059 | 18.56882   | 3.2433937 | 6.4757081 | 44.99807 | 11.20589 | 0.00612409 |
| 0.0108743 | 21.9321854 | 13.9738313 | 13.5632907 | 4.6798772 | 8.3276795 | 49.62053 | 11.03208 | 0.00232767 |
| 0.0989462 | 14.1878565 | 23.1027946 | 16.6401954 | 4.1994453 | 6.702319  | 55.76869 | 12.77603 | 0.20591348 |
| 0.0966256 | 11.9273414 | 18.5357138 | 18.6579585 | 3.0533613 | 8.9048335 | 34.44063 | 12.78359 | 0.09332548 |
| 0.0103432 | 14.7327374 | 15.3959597 | 11.9761584 | 4.047663  | 7.0930944 | 53.30736 | 12.83535 | 0.01992597 |
| 0.3113019 | 7.97899795 | 16.34962   | 11.0094438 | 2.6526323 | 4.9155252 | 54.34672 | 12.3891  | 0.00489963 |
| 0.3608558 | 11.2346699 | 23.9894762 | 14.5588387 | 4.5465609 | 7.7625207 | 63.99656 | 21.51791 | 0.03662339 |
| 1.4177246 | 12.5115371 | 19.4181455 | 14.2793988 | 3.9545422 | 7.4161412 | 50.20176 | 17.09377 | 0.27623311 |
| 0.8900277 | 15.0785403 | 21.515269  | 15.1598906 | 4.0871743 | 8.9563742 | 45.84104 | 19.1979  | 0.03626508 |
| 0.153514  | 13.3598457 | 19.8454197 | 12.8779524 | 3.8141393 | 8.9205284 | 55.78897 | 16.12851 | 0.37241385 |
| 0.0284131 | 16.4372642 | 17.3169394 | 18.2213386 | 4.2507237 | 9.4096259 | 49.83316 | 19.73345 | 0.03649138 |
| 0.47319   | 13.3798959 | 14.7968522 | 13.3808509 | 3.5175769 | 4.5429333 | 77.78451 | 7.889689 | 0.01929285 |
| 0.0453753 | 10.7616338 | 16.689128  | 13.0504697 | 4.487411  | 6.5907036 | 65.42317 | 14.66902 | 0.01765944 |
| 0.1986716 | 5.65017796 | 14.4743913 | 12.8741093 | 2.1572332 | 3.3357966 | 33.13929 | 9.894657 | 0.12901185 |
| 0.0068183 | 13.940636  | 19.0169157 | 15.8796637 | 3.8701817 | 8.6012751 | 57.87754 | 14.81189 | 0.74286785 |

|           |            |            |            |           |           |          |          |            |
|-----------|------------|------------|------------|-----------|-----------|----------|----------|------------|
| 0.4300347 | 10.5145956 | 20.9048293 | 14.5736172 | 4.5688475 | 7.4039728 | 64.30519 | 19.02494 | 0.0278443  |
| 0.1134502 | 11.9482365 | 17.2848981 | 13.4474378 | 3.2926656 | 8.4520333 | 46.87928 | 14.7483  | 0.06806959 |
| 2.3217376 | 11.2192876 | 18.7711635 | 12.6228383 | 3.0060016 | 6.1124951 | 51.02036 | 20.37343 | 0.05916351 |
| 0.9527759 | 11.9374525 | 13.4812787 | 14.5391198 | 4.334316  | 8.4721998 | 50.61201 | 17.95607 | 0.27116145 |
| 0.2168822 | 16.2903792 | 17.887141  | 16.1364426 | 3.5933574 | 8.4363121 | 64.57186 | 12.65108 | 0.00174527 |
| 2.7338314 | 15.6232693 | 15.3672526 | 15.3583747 | 5.0255943 | 7.826646  | 47.7252  | 17.94881 | 0.03228597 |
| 0.0324842 | 10.7069688 | 13.1616995 | 12.1774698 | 2.7188004 | 4.7649335 | 55.04427 | 11.32606 | 0.43979762 |
| 0.1460922 | 16.3183401 | 14.7351033 | 15.2756108 | 3.5431707 | 5.4518856 | 58.78666 | 9.074743 | 0.01901639 |
| 0.0553655 | 10.0764394 | 19.5877864 | 12.4470079 | 3.9838717 | 5.2873027 | 65.66404 | 15.92093 | 0.01917091 |
| 0.857977  | 18.6332906 | 17.1584106 | 13.2763697 | 4.7140704 | 9.2102245 | 54.08075 | 15.78485 | 0.03148321 |
| 0.7397952 | 10.1215377 | 19.3810173 | 19.1923485 | 4.6466958 | 6.2877789 | 37.03169 | 15.13494 | 0.03268795 |
| 0.2342265 | 17.8457192 | 22.6198643 | 19.9647286 | 4.6663458 | 9.470321  | 49.90268 | 14.64164 | 0.03581195 |
| 0.0352629 | 5.45475469 | 9.13521751 | 16.8584197 | 1.7670766 | 2.4694425 | 14.98599 | 14.2372  | 0.01258019 |
| 0.1066358 | 13.3419487 | 13.3702013 | 12.7656072 | 2.9310075 | 5.0541936 | 39.43139 | 9.929383 | 0.05035072 |
| 0.4876602 | 10.0031454 | 12.2691593 | 13.6081431 | 2.526994  | 4.2770204 | 38.37901 | 7.12953  | 0.0335373  |
| 5.0148339 | 8.01561622 | 10.6438552 | 15.4604833 | 2.9523896 | 3.80948   | 46.2859  | 18.42505 | 0.9515784  |
| 0.4923311 | 19.8353439 | 10.5958534 | 17.2450221 | 5.3133623 | 9.1096999 | 54.89531 | 10.40143 | 0.00652537 |
| 0.466504  | 14.3605463 | 15.210364  | 16.6721365 | 2.7740986 | 5.3344705 | 46.14258 | 8.108626 | 0.0182664  |
| 2.6196294 | 15.0496737 | 10.7560509 | 13.9573743 | 4.1867392 | 7.4438129 | 48.30563 | 15.07272 | 0.49764651 |
| 0.7125031 | 7.35677735 | 13.6404422 | 9.6477478  | 4.3084128 | 4.5177474 | 56.7941  | 21.02812 | 2.09262027 |
| 0.0157217 | 16.9770208 | 20.1555488 | 16.9032768 | 4.6383196 | 9.0107125 | 54.52132 | 14.8745  | 0.02734276 |
| 0.0191907 | 8.79780235 | 16.7811413 | 14.2548136 | 2.9041262 | 6.3783291 | 52.81051 | 12.75869 | 0.06908596 |
| 0.0278663 | 15.1530047 | 15.8429013 | 15.6263906 | 4.4812282 | 8.1655768 | 54.01596 | 12.66788 | 0.03834545 |
| 0.0209292 | 13.1217012 | 21.4869968 | 15.4490545 | 4.4122246 | 8.5118977 | 41.84118 | 9.74604  | 0.01119987 |
| 0.520115  | 12.7179322 | 16.2221224 | 14.3284796 | 3.470559  | 6.6338952 | 55.78449 | 10.08327 | 0.00927766 |
| 1.4954464 | 11.7268035 | 14.8480645 | 13.2824282 | 2.3756129 | 5.7900374 | 39.39731 | 8.254387 | 0.04182926 |
| 0.0748797 | 9.38063658 | 9.8862303  | 22.8071449 | 2.3723341 | 2.056906  | 26.09655 | 12.42738 | 0.4612554  |
| 0.8204711 | 14.6883116 | 15.346229  | 11.5029001 | 3.7492479 | 10.307101 | 41.61508 | 13.31699 | 0.20233159 |
| 1.4724051 | 13.0398438 | 14.8857223 | 16.209889  | 3.4747598 | 7.2406819 | 56.74216 | 23.1225  | 4.00804487 |
| 0.1217159 | 15.0784186 | 15.9659564 | 16.1058188 | 4.1906264 | 6.8885622 | 57.48131 | 9.354689 | 0.00827098 |
| 0.7776516 | 12.1082502 | 19.624737  | 14.8019678 | 3.8630883 | 8.0048798 | 52.08294 | 14.09395 | 0.01664582 |
| 0.1750454 | 10.6551242 | 13.9203756 | 12.7597354 | 2.8048298 | 4.4771502 | 58.74136 | 7.294516 | 0.00497375 |
| 0.2083065 | 7.67378095 | 14.0633735 | 8.16891466 | 2.9967319 | 4.4874467 | 61.86656 | 7.484236 | 0.02175049 |
| 0.0232615 | 11.5846134 | 21.5660291 | 14.4228201 | 5.1068359 | 9.1681557 | 42.34114 | 20.34547 | 0.02872598 |
| 0.0320433 | 5.2763717  | 13.5034081 | 21.861167  | 1.1034365 | 1.3180344 | 23.72356 | 8.98735  | 0.00403468 |
| 0.9546987 | 11.0651746 | 19.7870425 | 12.7768806 | 4.6412922 | 5.747504  | 52.48798 | 21.38825 | 0.0670961  |
| 0.4795884 | 13.7750306 | 21.444995  | 12.2735452 | 4.6617915 | 8.4240666 | 41.32548 | 19.28155 | 0.01655759 |
| 0.1033141 | 16.8401942 | 24.9299985 | 20.7339494 | 5.1782575 | 7.035692  | 62.60732 | 18.4489  | 0.01340281 |
| 6.8307871 | 13.3038973 | 20.0743473 | 17.208261  | 4.7989401 | 8.6706514 | 47.05733 | 18.50113 | 0.04372835 |
| 1.1201861 | 16.7176307 | 14.1528873 | 13.5974386 | 3.6924313 | 8.1044612 | 39.66996 | 13.70795 | 0.01515454 |
| 0.0118241 | 13.6086769 | 20.458158  | 19.2070759 | 4.5648951 | 8.3572647 | 49.47609 | 14.33334 | 0.00632742 |
| 2.2614236 | 6.30213647 | 14.8947168 | 17.482196  | 1.5512502 | 3.5964677 | 68.10542 | 12.26866 | 0.27176002 |
| 0.8027529 | 11.0251528 | 11.8590886 | 13.7880128 | 3.2423956 | 6.8023366 | 45.88167 | 10.61494 | 0.06608892 |
| 0.8506052 | 14.862543  | 24.0242769 | 20.6516832 | 3.8519561 | 6.1614934 | 51.97656 | 13.06624 | 0.00741646 |
| 1.0329231 | 14.9537081 | 17.1505442 | 17.6086259 | 5.3135363 | 10.605921 | 36.63422 | 16.88737 | 0.03212559 |
| 0.0150139 | 9.79810705 | 17.025156  | 17.6078482 | 2.1245618 | 4.0768558 | 43.33921 | 9.71952  | 0          |
| 0.4273209 | 11.7785243 | 18.2677174 | 15.7110968 | 3.8754304 | 7.3182088 | 47.32345 | 15.92685 | 0.05060789 |
| 1.5942775 | 10.9685062 | 19.202081  | 18.4126882 | 4.7013166 | 7.3193668 | 42.01443 | 20.31746 | 0.64035765 |
| 1.7164648 | 11.5852058 | 20.2709271 | 17.3937205 | 3.2639059 | 8.1995665 | 47.12695 | 13.76068 | 0.05193802 |
| 0.0178915 | 12.6978628 | 21.721354  | 16.7751514 | 4.1483589 | 7.0227582 | 57.575   | 15.16996 | 0.02340381 |
| 0.6031263 | 8.20074489 | 10.6539826 | 13.0899929 | 1.9883901 | 4.413679  | 28.29601 | 16.18647 | 1.74965322 |
| 0.4846467 | 12.9787215 | 20.3401707 | 14.6329026 | 4.7842018 | 9.0181239 | 44.98046 | 18.4051  | 0.00891235 |

|           |            |            |            |           |           |          |          |            |
|-----------|------------|------------|------------|-----------|-----------|----------|----------|------------|
| 1.113233  | 13.1913738 | 21.9555073 | 16.8986776 | 4.5630858 | 6.5147854 | 39.76356 | 19.42592 | 0.00951258 |
| 0.0144538 | 13.651093  | 23.0141805 | 16.228668  | 3.9567382 | 12.140588 | 46.41641 | 14.87571 | 0.02234461 |
| 0.3336839 | 8.61887059 | 23.987713  | 13.124216  | 3.5493075 | 5.0859039 | 33.82037 | 22.62321 | 0.47974865 |
| 2.3028822 | 11.1356814 | 15.4880379 | 16.3123347 | 3.2114159 | 6.009356  | 42.75566 | 13.60658 | 1.23728491 |
| 0.5410983 | 4.47766782 | 12.4963553 | 11.8193474 | 2.0259292 | 3.566919  | 39.47327 | 18.92158 | 0.30758961 |
| 0.0212432 | 12.5847269 | 19.3470505 | 14.6989129 | 4.1335546 | 8.7813524 | 42.49859 | 15.47121 | 0.10799479 |
| 2.3557678 | 10.489096  | 16.6331024 | 15.1570854 | 3.5240968 | 7.5934878 | 35.84286 | 13.64388 | 0.20532873 |
| 0.2950022 | 9.18861459 | 16.0917764 | 13.3207968 | 3.1790984 | 5.3926741 | 37.35353 | 10.76963 | 0.20091884 |
| 1.6781098 | 12.2819119 | 18.6714302 | 14.148258  | 4.6000428 | 6.8442232 | 47.31785 | 22.55913 | 0.17140413 |
| 0.0802087 | 8.24747083 | 18.6946242 | 15.2643671 | 2.9812586 | 5.0375404 | 40.61899 | 19.41352 | 0.54910785 |
| 0.2611239 | 7.83294434 | 12.5794033 | 14.3342108 | 1.7593123 | 4.082012  | 34.21122 | 6.126569 | 0.16697949 |
| 0.0516856 | 14.5611343 | 20.5275561 | 17.2466231 | 4.2344906 | 10.133814 | 43.5639  | 18.9609  | 0.01985744 |
| 0.0853752 | 6.40075619 | 13.746094  | 10.8123488 | 2.3083908 | 3.8106281 | 31.88849 | 12.40606 | 0.04488542 |
| 3.5024254 | 11.7408792 | 16.5469883 | 16.0871981 | 3.5616199 | 8.435993  | 38.30487 | 15.81076 | 0.04291478 |
| 2.6369014 | 14.9096917 | 16.0840936 | 13.2211214 | 4.3137179 | 5.9510324 | 47.89623 | 14.55779 | 0.2425424  |
| 0.4985662 | 16.9258696 | 14.2020009 | 16.8268112 | 4.7495643 | 11.099534 | 46.94699 | 21.77154 | 0.03621696 |
| 0.5482532 | 12.1831404 | 14.4062025 | 22.0597291 | 3.2103673 | 7.640944  | 39.99225 | 8.942378 | 0.05212465 |
| 0.4410058 | 13.520512  | 14.719451  | 17.5049206 | 3.5849553 | 4.7254181 | 53.76182 | 10.27826 | 0.01537432 |
| 0.0131475 | 10.8592557 | 12.5455248 | 14.1673655 | 2.5022823 | 4.61425   | 36.43691 | 8.370409 | 0.01583017 |
| 0.2528124 | 16.4884422 | 16.5564131 | 16.7041199 | 4.0458974 | 11.808723 | 43.32473 | 17.9635  | 0.03523774 |
| 0.337587  | 12.219193  | 11.2618092 | 13.1119166 | 2.2505734 | 6.3373519 | 30.23636 | 9.610468 | 0.04955975 |
| 1.2178844 | 13.1643854 | 16.511591  | 15.3706726 | 4.3253736 | 8.2233843 | 44.44438 | 18.75652 | 0.06754269 |
| 0.2135392 | 14.8716152 | 11.4495713 | 12.738609  | 3.260693  | 7.4119833 | 39.16758 | 12.51744 | 0.02770217 |
| 0.3594063 | 14.9169884 | 20.3260823 | 20.0243063 | 3.1384475 | 8.9517795 | 44.33169 | 14.80515 | 0.01570037 |
| 0.2399848 | 14.4020547 | 13.7464247 | 12.7652727 | 4.7133062 | 7.9098958 | 55.99179 | 18.22318 | 0.04525392 |
| 1.854826  | 14.8122351 | 17.9845329 | 14.950018  | 4.7394057 | 9.0570667 | 49.12033 | 22.20691 | 0.02639827 |
| 3.1843164 | 20.5232869 | 14.4612605 | 12.8656038 | 3.3716543 | 7.2100127 | 44.88005 | 15.81438 | 2.04512961 |
| 0.8061153 | 10.3140189 | 11.1084751 | 15.1128623 | 1.6620954 | 3.8250505 | 42.91575 | 7.140424 | 0.00798847 |
| 0.0679633 | 18.5511966 | 16.3600739 | 15.2884578 | 4.6823263 | 10.40581  | 44.62034 | 18.62556 | 0.01600247 |
| 0.2774422 | 12.2988509 | 18.0764552 | 16.1992417 | 3.0007442 | 8.5343924 | 52.83183 | 21.68676 | 4.16722451 |
| 0.6074602 | 10.5573357 | 19.104787  | 15.1861754 | 3.256225  | 4.6692058 | 48.93675 | 15.82327 | 1.11917237 |
| 2.1495445 | 16.4083892 | 12.5446657 | 16.7173946 | 4.3551274 | 10.919421 | 43.90357 | 18.07096 | 0.03979705 |
| 0.5355328 | 15.7824163 | 16.5233472 | 17.4922391 | 4.3181132 | 8.9361746 | 45.53107 | 17.48636 | 0.02211005 |
| 1.6210446 | 15.2836164 | 11.1408485 | 15.8182777 | 3.6701134 | 7.4279106 | 41.88765 | 11.44094 | 0.05222781 |
| 0.4315427 | 19.0299558 | 21.2458716 | 17.2796726 | 6.0506595 | 11.032054 | 43.75137 | 18.71797 | 0.01965378 |
| 0.0706715 | 8.86912374 | 10.2494283 | 23.5624742 | 1.4872159 | 4.2663125 | 20.30149 | 7.978399 | 0.12235397 |
| 0.3099032 | 12.168572  | 16.9802414 | 15.5212905 | 3.481326  | 8.0799382 | 51.65257 | 10.55499 | 0.01451089 |
| 0.1685574 | 14.3279901 | 16.0882496 | 23.1600759 | 5.8607152 | 7.5749139 | 37.49569 | 15.41404 | 0.20359491 |
| 0.2200279 | 14.8781625 | 16.0887425 | 20.6773445 | 5.3650828 | 8.2419187 | 44.09338 | 16.49639 | 0.16444654 |
| 0.2103012 | 16.2876437 | 14.1541219 | 15.6495264 | 3.4344698 | 9.3100263 | 44.18154 | 14.80319 | 0.1006925  |
| 0.0037725 | 18.0484272 | 16.2661302 | 16.9719054 | 5.0796022 | 10.442454 | 43.95016 | 16.63077 | 0.00942098 |
| 0.8904975 | 8.37960653 | 13.2659155 | 14.4299989 | 2.2004843 | 4.5352004 | 33.6753  | 9.951744 | 0.03085464 |
| 0.146117  | 13.0873457 | 13.655422  | 16.0061728 | 2.8099224 | 4.4818657 | 55.00421 | 8.658407 | 0.02057677 |
| 0.5402845 | 14.7138313 | 13.0507528 | 16.8755363 | 5.0819003 | 6.4610248 | 37.73437 | 13.48976 | 0.04405684 |
| 0.7446263 | 11.6074101 | 23.339733  | 20.1752371 | 4.4401862 | 6.4115721 | 55.19052 | 18.02783 | 0.00158754 |
| 0.2341951 | 16.7070436 | 16.0314078 | 13.7782939 | 4.1207309 | 7.5888633 | 54.57791 | 11.96118 | 0.01474412 |
| 0.7651244 | 17.6338089 | 18.6491348 | 17.7266626 | 4.0252649 | 9.7980214 | 53.18472 | 18.07717 | 0.05278255 |
| 0.3486585 | 11.5448072 | 15.2933891 | 16.8250268 | 2.7559345 | 5.5192329 | 33.14407 | 9.501519 | 0.08635014 |
| 0.6676864 | 7.34273773 | 14.5352306 | 15.629347  | 2.5132748 | 5.387235  | 29.75964 | 7.543317 | 0.01713081 |
| 1.1714105 | 14.2781472 | 17.5341733 | 13.0491533 | 4.9719687 | 6.735597  | 62.22873 | 13.56978 | 0.00462626 |
| 0.4341603 | 7.8681831  | 9.77967601 | 11.7237846 | 1.4984541 | 3.7315866 | 31.50642 | 5.219119 | 0.09957113 |
| 0.8361868 | 10.6784608 | 17.9403575 | 11.388282  | 2.9003246 | 5.3690509 | 46.74782 | 9.421022 | 0.03553107 |

|           |            |            |            |           |           |          |          |            |
|-----------|------------|------------|------------|-----------|-----------|----------|----------|------------|
| 1.9008467 | 12.5461531 | 14.4783575 | 17.8933585 | 3.1201488 | 7.3992095 | 56.21969 | 12.74308 | 0.02154709 |
| 0.0139257 | 10.6677182 | 17.2367203 | 12.7819407 | 2.8814639 | 5.5500349 | 45.71575 | 7.700377 | 0.02794526 |
| 0.0964624 | 4.88001935 | 10.6023205 | 13.120492  | 1.406217  | 2.4496944 | 24.92455 | 1.692728 | 0.11825679 |
| 0.0648926 | 9.75472105 | 19.7875578 | 16.1853827 | 3.3947773 | 6.7478724 | 52.54956 | 8.74544  | 0.02209838 |
| 0.0972703 | 12.8470077 | 14.6118906 | 12.4061045 | 3.3804144 | 7.9600754 | 58.5324  | 7.447124 | 0.03539561 |
| 0.4549011 | 6.62479868 | 15.9425126 | 12.8781346 | 1.8938365 | 5.3657544 | 40.57037 | 7.366814 | 0.3881967  |
| 0.0615444 | 12.2976846 | 16.5461958 | 12.8547967 | 3.5339366 | 6.3449688 | 55.30535 | 9.810056 | 0.03208983 |
| 0.9029282 | 14.2502297 | 13.4558339 | 14.0743101 | 4.3757167 | 8.1595781 | 64.62691 | 13.29213 | 0.01157329 |
| 0.0177066 | 10.9808212 | 18.4422895 | 16.2054538 | 3.9135278 | 8.2569311 | 47.35066 | 14.1539  | 0.11844162 |
| 0.7987674 | 9.41168893 | 19.4373299 | 16.116219  | 2.6604598 | 8.5296975 | 30.95041 | 9.601104 | 0.05995335 |
| 1.0500537 | 11.949927  | 19.2224901 | 14.6744812 | 4.618414  | 8.4501967 | 48.44821 | 15.70978 | 0.04099818 |
| 0.0240667 | 5.28591922 | 6.98743357 | 11.3120543 | 1.586725  | 2.458361  | 28.09072 | 5.08269  | 0.00286196 |
| 1.0554836 | 15.0487052 | 19.6697816 | 17.7181459 | 4.9062116 | 9.3490244 | 44.68041 | 17.19661 | 0.01694466 |
| 0.0461947 | 13.5236137 | 17.4028865 | 13.1636951 | 4.7094879 | 10.808351 | 42.86751 | 13.86012 | 0.03955238 |
| 3.3786117 | 11.7347828 | 16.8748498 | 11.8089375 | 3.7768831 | 9.5826149 | 36.37753 | 15.70713 | 0.03079463 |
| 0.7509981 | 8.62996916 | 12.5019642 | 11.4103145 | 2.7361674 | 5.0260138 | 35.87874 | 6.675809 | 0.01150976 |
| 1.0691045 | 6.13935614 | 8.88036189 | 9.51588014 | 1.8101029 | 2.6567571 | 32.77531 | 4.298895 | 0.27406513 |
| 0.0380444 | 20.7125502 | 19.8986663 | 15.8698262 | 5.8435341 | 9.781966  | 62.58014 | 12.77362 | 0.00169656 |
| 1.853458  | 15.8569266 | 17.3064129 | 12.8064683 | 4.9681826 | 11.17383  | 58.98603 | 16.06706 | 0.04247721 |
| 0.5278051 | 10.9209919 | 18.3893485 | 14.969659  | 3.857654  | 8.412574  | 50.25466 | 12.11237 | 0.04512433 |
| 0.3851905 | 11.4027475 | 18.3360425 | 16.3502167 | 3.2885104 | 4.8490389 | 48.84529 | 9.820717 | 0.00808343 |
| 1.1846224 | 9.32267434 | 20.5994262 | 16.1440282 | 2.4585917 | 10.413923 | 41.85907 | 13.69698 | 1.47474511 |
| 0.0201763 | 15.6773519 | 16.6102081 | 18.274498  | 3.0470936 | 8.3350518 | 49.97496 | 11.57048 | 0.05315422 |
| 0.0414275 | 13.7086265 | 21.2140123 | 22.2434618 | 4.2661339 | 13.525108 | 45.60797 | 14.53943 | 0.07255351 |
| 0.1335202 | 13.5969408 | 19.4493168 | 19.1324814 | 3.6110412 | 6.6750589 | 48.3349  | 8.340786 | 0.14806671 |
| 3.4769592 | 13.32649   | 24.9225039 | 21.0181302 | 4.5064663 | 11.387699 | 44.07369 | 17.14394 | 0.02122102 |
| 0.5991437 | 18.2822371 | 20.0951155 | 17.0913645 | 5.5545693 | 9.9513025 | 49.90137 | 17.39479 | 0.04742295 |
| 0.8072844 | 13.1859658 | 15.9352397 | 15.1899551 | 4.788865  | 9.5904233 | 44.08586 | 15.51877 | 0.04320029 |
| 0.3187039 | 11.3545859 | 16.6917124 | 13.7340124 | 2.2743735 | 6.4472826 | 36.41621 | 12.61207 | 0.68475803 |
| 0.2604677 | 13.7532179 | 21.0047568 | 15.0230939 | 4.3900092 | 7.8036461 | 56.371   | 16.01432 | 1.41897824 |
| 0.3164732 | 9.5654539  | 13.7478098 | 11.0464452 | 2.2516107 | 2.9955559 | 29.39058 | 6.794711 | 0.02971134 |
| 0.2577859 | 18.4722081 | 19.3472854 | 13.507595  | 5.8873827 | 7.1096052 | 46.93845 | 20.52264 | 0.02508167 |
| 0.6260121 | 13.3098561 | 17.9632347 | 18.8814246 | 4.8699579 | 8.15115   | 63.68502 | 9.921935 | 0.0205865  |
| 0.4094703 | 12.4567516 | 18.3110367 | 13.5816347 | 1.8888488 | 7.5215006 | 42.26143 | 14.99995 | 0.07888329 |
| 6.5277028 | 4.86946006 | 14.7488542 | 14.5085087 | 3.0345182 | 6.1081303 | 44.2218  | 4.12951  | 1.54950228 |
| 0.1059755 | 16.1117249 | 18.8071474 | 16.1570805 | 4.5040327 | 10.762991 | 49.24168 | 16.77281 | 0.01323251 |
| 0.2349525 | 8.87034177 | 20.7522798 | 14.5627929 | 3.8279703 | 6.0231348 | 53.76527 | 17.00698 | 0.12680496 |
| 0.3420202 | 9.83254852 | 18.0517556 | 13.9178055 | 2.8603044 | 5.5338775 | 39.59579 | 12.00419 | 0.7443041  |
| 0.0774527 | 9.80278222 | 13.0916179 | 14.3617019 | 2.3546668 | 4.7491324 | 37.29166 | 9.988613 | 0.11865324 |
| 0.2406609 | 8.73405599 | 16.4835609 | 13.8902036 | 2.9100993 | 5.3712702 | 52.83032 | 12.29706 | 0.00865782 |
| 1.3352492 | 8.38120888 | 18.7513535 | 13.1086794 | 3.5104839 | 5.9658899 | 39.20632 | 17.67206 | 0.07043389 |
| 1.0361221 | 10.2639441 | 15.3367937 | 13.039063  | 3.3904813 | 6.4360695 | 41.89762 | 12.18861 | 0.44961408 |
| 0.0770653 | 8.0619397  | 14.3896474 | 14.5708155 | 1.9825179 | 3.7211704 | 29.03187 | 8.90019  | 0.17349252 |
| 0.2285485 | 10.639275  | 19.6761006 | 13.2192796 | 4.0372092 | 6.3078797 | 57.85484 | 17.78093 | 0.00577811 |
| 1.3014406 | 9.80315619 | 13.8444505 | 13.7186983 | 2.4791126 | 4.2730486 | 32.63631 | 10.52822 | 0.00232147 |
| 0.3245654 | 13.4354919 | 16.0647774 | 21.161285  | 4.4877577 | 6.7245066 | 46.75077 | 10.02032 | 0.0194182  |
| 0.0308029 | 14.427526  | 25.66624   | 22.5248898 | 3.5096806 | 7.4394068 | 61.32288 | 14.2424  | 0.00549453 |
| 0.7465764 | 10.2691875 | 16.9975928 | 16.3164102 | 2.3282997 | 4.5668346 | 39.31159 | 16.949   | 0.55399577 |
| 0.4550891 | 10.0836555 | 11.3075553 | 15.9435597 | 1.9960376 | 5.0042961 | 34.70318 | 10.05795 | 0.46997456 |
| 0.0395642 | 11.0003081 | 17.325629  | 17.9223466 | 3.1574851 | 6.3560695 | 37.29835 | 12.63559 | 0.17445751 |
| 1.3632056 | 14.7341971 | 18.4212373 | 14.9405932 | 3.7414596 | 6.1955605 | 57.62777 | 11.31923 | 0.00896184 |
| 0.3952488 | 14.5868223 | 19.4891505 | 15.5106698 | 4.4773964 | 8.363742  | 49.48609 | 17.98891 | 0.01626999 |

|           |            |            |            |           |           |          |          |            |
|-----------|------------|------------|------------|-----------|-----------|----------|----------|------------|
| 0.0038743 | 9.24176226 | 15.4506    | 13.208672  | 2.7257567 | 5.3598063 | 41.8116  | 8.317368 | 0.03939172 |
| 0.02645   | 9.44633805 | 15.0759877 | 15.6838088 | 3.1723997 | 7.1905054 | 44.6331  | 10.1436  | 1.06073338 |
| 0.3083915 | 13.9979386 | 20.6433312 | 19.2433348 | 4.2168097 | 9.9941919 | 45.40762 | 13.37912 | 0.04578863 |
| 0.4032161 | 10.4848463 | 16.4986471 | 14.0446436 | 2.9345106 | 7.2382948 | 44.0631  | 14.44679 | 0.32240075 |
| 0.1421096 | 5.89289563 | 19.4961374 | 15.5819277 | 1.6841608 | 3.4033383 | 37.18611 | 10.41596 | 0.04947653 |
| 0.0487628 | 14.8907008 | 17.0266368 | 14.2632895 | 3.6656615 | 5.6092485 | 46.30128 | 14.43578 | 0.00579877 |
| 0.4011682 | 11.662798  | 21.4854922 | 14.2234052 | 3.8669153 | 7.5337808 | 42.84924 | 18.25737 | 0.01951614 |
| 1.0283508 | 19.0339208 | 15.7178666 | 18.3186178 | 5.7486959 | 10.846605 | 45.69364 | 12.90926 | 0.03813977 |
| 0.2512447 | 12.3068625 | 22.1055406 | 16.2534472 | 3.3647482 | 7.1506022 | 54.63678 | 13.05691 | 0.05638177 |
| 0.4536971 | 12.6559313 | 16.0639801 | 13.8181977 | 3.6536202 | 8.7823278 | 36.15894 | 14.87561 | 0.0232456  |
| 0.2960957 | 18.6201842 | 20.3405604 | 18.8536157 | 4.723994  | 10.690516 | 47.0133  | 17.28448 | 0.04590608 |
| 0.1594045 | 12.6480458 | 17.3665898 | 18.6542638 | 2.6971851 | 5.2536854 | 53.89877 | 9.14866  | 0.26912269 |
| 0.9515261 | 10.706932  | 14.410251  | 16.643006  | 2.6215    | 5.1266446 | 39.29624 | 13.42443 | 1.44779676 |
| 0.527161  | 12.0525743 | 18.57178   | 15.0850655 | 3.2434932 | 7.096441  | 45.95123 | 9.714069 | 0.05783054 |
| 0.7317721 | 12.5719063 | 11.5594697 | 16.5701461 | 3.2684585 | 9.1712992 | 43.85405 | 8.779799 | 0.04146289 |
| 0.0117208 | 12.2321526 | 22.3052113 | 18.8955225 | 5.082536  | 10.549894 | 61.15405 | 15.70466 | 0.02508856 |
| 0.0464203 | 13.4900674 | 16.5900628 | 15.3194074 | 4.0592792 | 15.36487  | 55.67204 | 15.58303 | 0.02018328 |
| 0.0880221 | 13.568459  | 16.016075  | 13.210967  | 3.7766818 | 9.1467468 | 41.42735 | 13.88519 | 0.01916069 |
| 0.1916706 | 16.0132889 | 18.7990019 | 16.6793635 | 3.9747831 | 11.019396 | 46.73836 | 15.21076 | 0.02099835 |
| 1.800047  | 11.0267034 | 11.3304848 | 9.10647815 | 2.3043608 | 5.9889843 | 32.90814 | 4.220912 | 0.34314639 |
| 0.1225318 | 12.8742231 | 17.5073993 | 14.614404  | 3.8173847 | 6.7105591 | 46.41001 | 10.53532 | 0.01457124 |
| 0.1926532 | 12.4535101 | 18.0451032 | 13.6198269 | 2.9647572 | 8.6779818 | 44.45005 | 14.84701 | 0.16239698 |
| 1.8520244 | 12.3079256 | 19.0371076 | 17.4502966 | 3.4933532 | 8.136519  | 41.83231 | 13.30348 | 0.34094698 |
| 0.9355886 | 7.76375853 | 13.4893649 | 10.9749692 | 2.1417341 | 7.3957949 | 32.48374 | 9.476503 | 1.34054938 |
| 0.7144933 | 9.1784528  | 16.8971215 | 15.0066362 | 2.5733636 | 6.4575371 | 32.9938  | 7.041535 | 0.05771283 |
| 0.0310708 | 11.6406274 | 19.3784106 | 17.1811292 | 3.5264602 | 6.1867987 | 49.25743 | 14.93267 | 0.02955905 |
| 0.0480129 | 8.10301782 | 15.9259003 | 14.0565656 | 2.3824758 | 6.1109056 | 37.18736 | 8.434551 | 0.19820472 |
| 0.8399615 | 8.27099433 | 13.0406343 | 15.9987901 | 2.3025442 | 5.7569125 | 40.49691 | 13.85472 | 0.85999878 |
| 1.0172145 | 10.6605502 | 12.8420296 | 17.5467356 | 3.8951164 | 4.8073803 | 63.11094 | 12.32699 | 0.05911417 |
| 2.131267  | 4.97461645 | 14.5992824 | 20.252511  | 2.3163952 | 3.3181624 | 28.5178  | 9.347228 | 1.05037215 |
| 0.4221252 | 11.777537  | 19.6618781 | 17.5931077 | 3.7461492 | 7.796905  | 40.22038 | 13.84159 | 0.03115756 |
| 3.14231   | 10.576855  | 29.9726932 | 22.2023366 | 3.0777393 | 9.1327087 | 56.73572 | 32.65664 | 0.75799295 |
| 0.2776512 | 10.9774314 | 15.0453268 | 14.0109062 | 3.0767556 | 8.2142068 | 39.87456 | 14.04187 | 0.61240712 |
| 1.9043185 | 10.1788208 | 19.6695286 | 16.2413976 | 3.3823604 | 7.0988817 | 53.5453  | 11.70829 | 0.50842943 |
| 1.107313  | 12.2105643 | 22.5275164 | 15.210066  | 4.4951572 | 6.9975428 | 55.30667 | 11.43399 | 0.01012919 |
| 1.1833458 | 12.6461245 | 22.6144662 | 15.3097183 | 4.1425842 | 7.8702336 | 40.02678 | 14.69834 | 0.02922669 |
| 0.1503137 | 8.99035699 | 14.8318858 | 17.205922  | 3.0989468 | 8.4329596 | 45.42447 | 10.99309 | 0.10923613 |
| 0.0452483 | 11.0102405 | 13.8068226 | 17.086788  | 3.8395499 | 7.2012266 | 62.3866  | 9.103081 | 1.91475202 |
| 1.1010564 | 10.8249393 | 19.0610842 | 13.9387235 | 4.3124834 | 6.6742273 | 52.31677 | 17.70988 | 0.79695127 |
| 0.5410731 | 15.6517413 | 13.9460363 | 18.1263564 | 4.1872934 | 10.644771 | 46.30493 | 11.42278 | 1.14089378 |
| 0.3198462 | 8.54130859 | 15.7423592 | 11.7861694 | 2.9851349 | 5.3883362 | 41.9057  | 11.24387 | 0.06495287 |
| 2.5629627 | 11.9338416 | 29.9933781 | 19.6955796 | 5.0000224 | 9.0249845 | 45.23719 | 24.96111 | 0.01427841 |
| 0.0349302 | 8.20416785 | 15.774424  | 15.0497948 | 2.3963989 | 4.9735343 | 43.1922  | 12.11365 | 0.12914642 |
| 0.1174728 | 13.7722593 | 24.8317352 | 16.9272284 | 4.2229235 | 9.7257978 | 40.40386 | 19.15079 | 1.14310082 |
| 0.3500043 | 10.9047158 | 19.4500621 | 13.2892082 | 3.3859923 | 7.6152738 | 43.55214 | 17.2128  | 0.76509525 |
| 0.7387054 | 18.07598   | 18.3564794 | 14.2174251 | 5.3829482 | 10.036026 | 43.00147 | 19.48225 | 0.02168335 |
| 2.8796643 | 13.2473606 | 20.2638682 | 15.0086765 | 3.729675  | 7.0711487 | 34.44854 | 17.08942 | 0.01686198 |
| 0.8709207 | 17.7547995 | 20.6255121 | 16.151188  | 4.9154683 | 8.5696836 | 42.89041 | 19.20122 | 0.00647301 |
| 0.8515137 | 11.6345975 | 20.9216856 | 14.0707537 | 4.1475537 | 8.399063  | 39.23805 | 18.71076 | 0.0214014  |
| 1.0874564 | 7.58716996 | 18.8497652 | 12.7667486 | 2.8742572 | 6.2175004 | 33.87442 | 18.56947 | 2.47476274 |
| 0.1980197 | 14.2845721 | 19.2611036 | 15.7330282 | 2.6831803 | 7.4382442 | 44.52865 | 15.08109 | 0.01999368 |
| 0.7469858 | 10.8259183 | 18.2559985 | 17.2287698 | 3.8741731 | 7.7739909 | 47.04345 | 10.61996 | 0.14321581 |

|           |            |            |            |           |           |          |          |            |
|-----------|------------|------------|------------|-----------|-----------|----------|----------|------------|
| 0.7684054 | 10.5245927 | 23.395093  | 18.0932706 | 4.5849303 | 9.1914122 | 46.88314 | 20.4342  | 0.01461108 |
| 1.0501245 | 10.3621327 | 20.3457927 | 26.154932  | 4.196389  | 10.09399  | 53.44193 | 17.37789 | 3.86252749 |
| 0.0059297 | 17.7318114 | 20.2917931 | 19.6394028 | 5.9153488 | 13.66254  | 47.04471 | 13.15499 | 0.01110605 |
| 0.2297026 | 12.8694655 | 17.6592979 | 14.6962413 | 4.2769574 | 5.665519  | 45.74094 | 12.73251 | 0.0439585  |
| 0.0017133 | 15.1245113 | 27.2732652 | 22.3761484 | 5.5424166 | 12.878642 | 59.53335 | 22.5292  | 0.00550092 |
| 0.3298264 | 10.0138914 | 16.421444  | 13.669031  | 2.8350839 | 9.3495895 | 44.19077 | 17.77827 | 2.19862782 |
| 0.2829017 | 15.0592984 | 13.5499176 | 11.9664225 | 4.3618995 | 6.5954651 | 45.81786 | 13.9888  | 0.01137198 |
| 1.5217432 | 9.59222784 | 14.2781338 | 23.8061273 | 2.6662854 | 5.1972386 | 33.88533 | 13.37502 | 1.99728425 |
| 1.3085717 | 9.45310847 | 17.8519302 | 13.1760432 | 3.5703431 | 7.0703736 | 49.62547 | 16.38012 | 0.30293263 |
| 2.7294874 | 9.66381519 | 16.1997166 | 15.0879238 | 3.3628143 | 5.345267  | 36.79632 | 12.70844 | 4.16257175 |
| 0.7390751 | 8.11393157 | 12.7815311 | 11.8383427 | 2.0851725 | 5.093783  | 53.87696 | 13.27715 | 4.501574   |
| 1.8810949 | 16.9450476 | 28.740533  | 20.871263  | 5.667668  | 8.473201  | 71.56843 | 21.99696 | 0.00433271 |
| 0.3510337 | 9.10920357 | 16.3551645 | 14.5571482 | 2.7545179 | 5.8661326 | 66.22354 | 11.12339 | 10.2755179 |
| 0.0379275 | 11.3938647 | 18.4579591 | 10.4523123 | 3.5987196 | 5.3074451 | 52.89489 | 19.18136 | 0.88067742 |
| 0.867244  | 16.4154767 | 21.6957186 | 16.9468636 | 5.2581363 | 11.859295 | 54.38415 | 14.03138 | 0.11993315 |
| 1.3683731 | 12.9401777 | 13.4525622 | 14.5835556 | 4.6834143 | 5.454931  | 45.54469 | 17.63293 | 0.02587487 |
| 0.1116802 | 19.9231701 | 11.8221696 | 14.9624233 | 4.8941658 | 10.536706 | 46.54272 | 15.34468 | 0.08274949 |
| 0.2068204 | 12.7135784 | 24.3162793 | 19.0387681 | 3.9839866 | 8.4681208 | 57.38947 | 9.850565 | 0.01492261 |
| 0.0175752 | 12.7348719 | 16.7238146 | 14.9525753 | 3.7474239 | 7.0347418 | 40.45977 | 21.2584  | 0.01763442 |
| 0.0732052 | 12.8993897 | 14.4992854 | 14.501668  | 4.2669356 | 7.3051716 | 43.46586 | 12.03951 | 0.00949681 |
| 0.0107046 | 12.3572085 | 19.5024447 | 14.1836102 | 2.9011783 | 6.0635767 | 48.73622 | 11.20691 | 0.02673231 |
| 0.7325455 | 13.914104  | 18.8659758 | 17.1969063 | 4.5649229 | 7.8668138 | 62.05787 | 9.123147 | 0.00488991 |
| 0.0038362 | 15.3253868 | 10.6006967 | 9.2627185  | 3.3236605 | 6.3193578 | 78.41623 | 11.95238 | 0.05474369 |
| 0.1723109 | 15.4042495 | 18.6199271 | 14.2744259 | 4.5352647 | 9.1585427 | 50.31134 | 19.69627 | 0.31796178 |
| 3.0255407 | 8.29196176 | 11.5101342 | 17.316194  | 2.3009885 | 7.094257  | 33.19827 | 16.29564 | 2.69093876 |
| 0.0099432 | 10.8413581 | 15.0848512 | 13.2878277 | 3.4600723 | 7.6285111 | 60.03195 | 11.32029 | 0.02128371 |
| 0.3402595 | 14.3764929 | 17.1033998 | 13.1797032 | 3.6384128 | 8.1371003 | 49.41521 | 14.10924 | 0.01342551 |
| 0.6121962 | 12.1776597 | 14.9028543 | 12.9738507 | 3.0898743 | 5.6064524 | 51.66466 | 9.028817 | 0.0164981  |
| 0.0405493 | 9.84758245 | 12.9980599 | 14.6044459 | 2.542803  | 6.8165759 | 51.61078 | 10.0111  | 0.01215153 |
| 0.5525831 | 10.5549331 | 18.203471  | 14.3498515 | 3.7913972 | 9.7651103 | 52.71094 | 17.86213 | 0.97170336 |
| 1.0118818 | 12.9127906 | 19.4700231 | 18.1434301 | 5.670299  | 9.3315141 | 39.61065 | 26.29591 | 0.04666624 |
| 1.1482566 | 16.7362373 | 18.9728646 | 14.0108557 | 6.095567  | 11.714916 | 48.21886 | 11.20505 | 0.03795939 |
| 1.0086494 | 10.1479353 | 15.7235346 | 15.2022311 | 3.0234068 | 8.3888879 | 44.6714  | 15.32768 | 1.18398877 |
| 1.232101  | 14.5775777 | 21.6234434 | 17.1309686 | 4.1412608 | 8.5614637 | 59.57924 | 17.86425 | 0.01365855 |
| 1.9989971 | 9.83105239 | 17.8185049 | 13.8309297 | 2.8574707 | 5.9910998 | 38.79662 | 18.78891 | 1.81551124 |
| 0.7357634 | 15.7876363 | 21.1576564 | 16.6173439 | 3.9196521 | 8.5135924 | 63.11514 | 16.66575 | 0.00346136 |
| 0.4169067 | 6.24509081 | 13.9268397 | 20.7493377 | 2.0100398 | 4.0236462 | 37.44294 | 11.8112  | 1.56348257 |
| 0.1461842 | 8.65290897 | 11.504852  | 14.08915   | 1.8056398 | 4.2254429 | 45.05974 | 11.4434  | 0.2881069  |
| 0.1441587 | 10.8536698 | 17.1216538 | 14.9337801 | 3.1145511 | 5.930199  | 52.33816 | 13.32983 | 0.81237135 |
| 0         | 11.0872371 | 29.4415071 | 22.5641515 | 4.8146946 | 13.248532 | 61.09963 | 23.34813 | 0.00964675 |
| 1.3912956 | 10.4710818 | 16.8130838 | 16.4636649 | 3.2728006 | 5.3729844 | 37.84235 | 12.87576 | 0.1780206  |
| 1.1521957 | 14.9879275 | 20.4569292 | 13.7344925 | 4.4490313 | 9.9160944 | 39.691   | 16.743   | 0.07436957 |
| 0         | 22.5196057 | 18.4849749 | 16.8332005 | 6.5782204 | 14.790272 | 58.37021 | 11.51258 | 0.00597599 |
| 0.0983975 | 9.77334635 | 17.0151321 | 16.317751  | 3.1390521 | 7.2866925 | 38.62054 | 13.02328 | 0.97157966 |
| 0.5851719 | 12.7967931 | 20.8168204 | 13.6797802 | 4.547151  | 10.04988  | 45.87948 | 10.63165 | 0.02658767 |
| 0.1023616 | 21.8484338 | 23.7210541 | 13.417016  | 10.296345 | 15.546256 | 42.33742 | 41.61662 | 0.05203803 |
| 0.1886377 | 8.15115011 | 20.2996673 | 20.9476007 | 2.7017718 | 6.3380695 | 47.98388 | 9.913865 | 0.00212518 |
| 1.4605968 | 9.29521398 | 26.338071  | 19.4501695 | 3.9858453 | 6.4647471 | 45.97686 | 13.45666 | 0.00544676 |
| 0.0080808 | 15.9609574 | 19.680932  | 15.1452717 | 5.071678  | 11.024346 | 42.83543 | 18.92811 | 0.01729714 |
| 0.1321225 | 8.043894   | 18.5695866 | 14.9897562 | 2.9515074 | 4.3815532 | 50.71072 | 9.953641 | 0.0101004  |
| 0.2581934 | 11.2320972 | 22.3127986 | 15.3231871 | 3.71064   | 8.8814587 | 56.35158 | 14.66032 | 0.02686587 |
| 0.9567272 | 15.0236354 | 21.3398389 | 17.742318  | 4.3043875 | 8.6012191 | 55.49647 | 12.82686 | 0.29947749 |

|           |            |            |            |           |           |          |          |            |
|-----------|------------|------------|------------|-----------|-----------|----------|----------|------------|
| 0.177168  | 12.4168838 | 17.0146553 | 14.7644546 | 3.0932118 | 8.5944805 | 43.60264 | 12.20253 | 0.08668168 |
| 0.1648499 | 15.8547304 | 20.1189909 | 16.4661756 | 4.1875045 | 10.413338 | 52.23953 | 9.860322 | 0.02395998 |
| 0.0664269 | 14.906516  | 18.8116103 | 17.5247178 | 4.1072743 | 9.8455664 | 42.28839 | 14.16633 | 0.0056127  |
| 1.1456826 | 9.22272    | 12.0654881 | 18.2171604 | 1.772544  | 2.130485  | 26.78266 | 11.4231  | 0.74313976 |
| 0.0044437 | 10.8045166 | 18.5607585 | 18.804344  | 2.5365164 | 4.329755  | 54.83565 | 9.901137 | 0.01426792 |
| 1.1268034 | 17.9778117 | 23.3211712 | 22.1261437 | 4.4594726 | 9.1813468 | 56.20411 | 13.70964 | 0.02496842 |
| 0.1836714 | 19.4408678 | 17.9140332 | 17.0651888 | 4.4113026 | 10.832761 | 46.44636 | 13.8729  | 0.00607969 |
| 0.1397276 | 15.7078864 | 14.5204676 | 12.5091813 | 3.7659925 | 9.4547884 | 44.02399 | 13.35317 | 0.00946488 |
| 2.1572938 | 9.26256307 | 11.915878  | 12.9180479 | 3.270075  | 6.0172567 | 33.86092 | 10.10335 | 0.00618171 |
| 1.0853396 | 13.4987129 | 19.3899221 | 14.9888375 | 4.6650927 | 10.091802 | 45.18697 | 19.40021 | 0.02042669 |
| 0.918479  | 8.58030249 | 11.834889  | 14.536173  | 3.360082  | 10.578789 | 41.99272 | 18.646   | 0.04336823 |
| 0.0134005 | 6.43999801 | 12.5892245 | 16.9877614 | 1.25587   | 2.2070375 | 31.93828 | 6.175536 | 0          |
| 0.5228733 | 13.3830182 | 14.1414786 | 15.9495939 | 2.6760138 | 4.0668966 | 50.20786 | 8.389222 | 0.00337115 |
| 0.0077154 | 6.42128846 | 12.2201251 | 16.1380699 | 1.2648649 | 1.5404637 | 30.49062 | 5.87277  | 0.08257476 |
| 0.1762592 | 16.633863  | 9.60248377 | 22.4643394 | 3.7779371 | 5.2345103 | 52.31294 | 8.968615 | 0.01006099 |
| 0.0950573 | 17.6609153 | 14.9652576 | 21.3827534 | 5.2546791 | 8.6340707 | 53.0268  | 15.97139 | 0.01090031 |
| 0.4980948 | 14.2800551 | 14.5628883 | 15.8682891 | 3.3164886 | 6.5434929 | 44.19559 | 7.833228 | 0.04795007 |
| 0.0053279 | 11.4117238 | 12.915808  | 15.4813476 | 2.6734188 | 4.4205731 | 49.03639 | 10.41822 | 0.00570224 |
| 0.0740723 | 9.24004713 | 13.7894031 | 17.2650004 | 2.3467553 | 4.6011442 | 33.55316 | 8.178152 | 0.19290691 |
| 0.2571829 | 15.5422028 | 23.4248373 | 20.956318  | 4.8529433 | 5.839417  | 52.54936 | 11.79943 | 0.02274819 |
| 0.0715919 | 12.1053507 | 12.8357006 | 27.5655877 | 5.4866939 | 9.3021396 | 45.47796 | 19.06766 | 0.00170271 |

| RBMX     | FTO      | WTAP      | RBM15      |
|----------|----------|-----------|------------|
| 29.2852  | 8.927291 | 17.092162 | 2.63468237 |
| 21.41035 | 4.307182 | 14.909452 | 2.14979926 |
| 34.34271 | 7.854573 | 16.575344 | 2.04841609 |
| 41.01977 | 14.29238 | 24.50153  | 2.724534   |
| 29.9218  | 9.968618 | 18.724803 | 2.71063193 |
| 25.71845 | 16.08871 | 16.284741 | 3.09869755 |
| 29.15226 | 5.509174 | 7.1797147 | 2.07825651 |
| 30.92681 | 5.337254 | 14.392473 | 1.98849553 |
| 32.53826 | 6.650798 | 11.243027 | 3.94958845 |
| 16.8075  | 7.638653 | 10.823735 | 2.43863359 |
| 42.78228 | 13.06933 | 12.158672 | 3.99461582 |
| 41.90186 | 8.85785  | 13.228429 | 2.99722343 |
| 33.17444 | 9.283298 | 15.590357 | 2.20088463 |
| 27.8326  | 18.19879 | 13.986263 | 2.26912218 |
| 43.9642  | 11.94292 | 16.521027 | 2.11314109 |
| 34.872   | 10.69575 | 17.399244 | 2.06522665 |
| 29.81693 | 3.862034 | 15.125033 | 0.99213418 |
| 43.6714  | 14.30401 | 20.835417 | 2.49097012 |
| 32.26326 | 10.87328 | 17.287201 | 3.80789656 |
| 25.13821 | 10.61985 | 13.192605 | 2.26846251 |
| 37.91361 | 10.58266 | 18.599332 | 2.04273242 |
| 27.1838  | 9.716988 | 12.879361 | 1.82952641 |
| 26.33907 | 11.91087 | 12.55467  | 3.11131055 |
| 32.80375 | 12.18078 | 16.354625 | 1.7663364  |
| 39.49437 | 13.36013 | 19.068578 | 2.98773794 |
| 42.56578 | 18.22713 | 13.081955 | 2.70832412 |
| 26.68628 | 11.50047 | 14.376524 | 2.55375892 |
| 35.94001 | 17.38017 | 16.962167 | 2.37518961 |
| 36.84635 | 10.40024 | 19.054    | 2.84459018 |
| 37.83001 | 9.455829 | 17.825345 | 2.07447657 |
| 32.08947 | 7.085089 | 19.699383 | 1.70374208 |
| 47.50988 | 9.828146 | 29.494301 | 2.56510809 |
| 44.95703 | 11.8422  | 13.565181 | 2.7632621  |
| 32.35722 | 12.67476 | 17.028496 | 2.96499028 |
| 46.87248 | 13.46893 | 14.542393 | 2.90907165 |
| 23.73658 | 9.391943 | 21.64843  | 2.67757554 |
| 17.71368 | 3.305981 | 10.150481 | 1.44028463 |
| 32.02139 | 10.39325 | 14.011314 | 2.57152692 |
| 21.54406 | 11.86295 | 28.297688 | 2.90505258 |
| 44.48478 | 8.570007 | 18.110241 | 1.58000393 |
| 41.83174 | 17.2336  | 13.185377 | 2.00159616 |
| 35.20825 | 8.505982 | 16.159617 | 2.82488412 |
| 36.96593 | 10.14426 | 12.674298 | 2.55346414 |
| 30.01437 | 16.36952 | 17.340211 | 2.7518171  |
| 28.29805 | 8.496191 | 14.598006 | 2.09186031 |
| 29.77493 | 9.170068 | 20.384739 | 3.79277762 |
| 31.63244 | 9.540948 | 13.480217 | 2.65877263 |
| 36.69461 | 9.307657 | 15.001708 | 2.75561406 |
| 30.80728 | 9.20912  | 9.5896419 | 3.69357236 |
| 24.50287 | 11.13931 | 15.669331 | 2.51753617 |



|          |          |           |            |
|----------|----------|-----------|------------|
| 27.66563 | 6.321759 | 12.755225 | 2.21709157 |
| 36.05772 | 8.630711 | 13.235995 | 2.71578249 |
| 21.37119 | 7.430609 | 16.779628 | 2.89200494 |
| 25.21974 | 6.574372 | 17.178886 | 2.06120308 |
| 21.03501 | 2.088491 | 10.443497 | 3.07874359 |
| 40.46401 | 2.112169 | 19.992073 | 0.4250212  |
| 48.52062 | 9.274806 | 31.456346 | 2.6321234  |
| 25.84362 | 8.948753 | 15.095342 | 2.72356729 |
| 39.99892 | 11.54489 | 15.733777 | 2.09375968 |
| 23.00878 | 2.485756 | 7.6158224 | 1.64221267 |
| 30.60469 | 6.741837 | 9.6980085 | 2.2732869  |
| 40.52723 | 5.382771 | 8.63859   | 1.20469801 |
| 21.15146 | 2.810565 | 15.426164 | 1.46575571 |
| 27.22197 | 3.860484 | 14.105742 | 2.25821244 |
| 20.91563 | 9.886515 | 11.998438 | 1.59415391 |
| 13.61066 | 0.702754 | 5.3900837 | 0.73888312 |
| 24.09707 | 10.6143  | 20.169869 | 2.14987538 |
| 24.18069 | 2.922496 | 15.880984 | 1.90261457 |
| 21.69878 | 7.570153 | 12.883134 | 2.31969631 |
| 18.99754 | 2.878396 | 9.1808246 | 1.759408   |
| 31.68133 | 11.99894 | 23.528654 | 2.4434279  |
| 26.07955 | 5.554022 | 13.255462 | 1.72788961 |
| 37.24548 | 4.727108 | 22.37014  | 1.93011141 |
| 39.61369 | 8.515511 | 20.284116 | 2.18442864 |
| 35.42647 | 9.339238 | 16.844453 | 2.75602431 |
| 23.38824 | 3.074745 | 7.5492093 | 1.15554319 |
| 10.99185 | 2.450718 | 4.9014285 | 0.82515269 |
| 31.62088 | 7.460109 | 14.961697 | 2.11668676 |
| 34.25435 | 4.075902 | 15.058355 | 2.19426779 |
| 29.98482 | 7.199689 | 18.006181 | 2.52147278 |
| 22.35452 | 6.416914 | 17.232264 | 1.49966223 |
| 31.98864 | 11.15727 | 18.812562 | 3.47161038 |
| 23.25603 | 5.658322 | 10.123705 | 2.15335323 |
| 29.88624 | 5.938587 | 8.1848355 | 2.59587249 |
| 25.63976 | 3.47364  | 17.335421 | 3.77103825 |
| 42.21032 | 3.422753 | 15.588278 | 2.20122871 |
| 29.33658 | 4.995592 | 14.961503 | 3.24557346 |
| 20.98588 | 4.413836 | 12.569031 | 2.55987784 |
| 41.35002 | 11.42038 | 21.164437 | 3.41068592 |
| 28.57009 | 9.83333  | 12.327854 | 2.03775248 |
| 31.90088 | 6.234626 | 12.206061 | 2.30490355 |
| 18.15578 | 12.87594 | 8.8086931 | 2.27087653 |
| 44.22354 | 15.63001 | 15.679189 | 4.10740939 |
| 27.23877 | 10.19346 | 11.570666 | 2.73522348 |
| 17.38358 | 6.455334 | 14.471568 | 1.97685075 |
| 36.50484 | 4.974872 | 14.164181 | 2.65459874 |
| 36.16754 | 5.306192 | 17.055918 | 2.18531358 |
| 26.38803 | 6.960102 | 11.544891 | 2.1628736  |
| 33.65609 | 6.585396 | 16.273761 | 1.66920068 |
| 27.80151 | 2.695672 | 12.421341 | 2.87305968 |
| 39.44435 | 10.94585 | 14.267904 | 2.55736502 |
| 27.16691 | 6.319016 | 16.658666 | 2.83652375 |

|          |          |           |            |
|----------|----------|-----------|------------|
| 27.01574 | 7.180562 | 28.764484 | 1.84802638 |
| 15.74116 | 5.117945 | 16.105965 | 1.39581315 |
| 27.18411 | 9.989717 | 16.834374 | 3.07842746 |
| 23.33693 | 4.110709 | 15.008383 | 2.63417537 |
| 18.83947 | 3.932751 | 13.953764 | 2.2929164  |
| 19.62769 | 2.712682 | 10.218037 | 1.78373788 |
| 35.53375 | 8.606075 | 16.076766 | 2.30775257 |
| 29.03872 | 7.228266 | 10.096934 | 2.71164531 |
| 16.55331 | 8.389143 | 18.609498 | 2.46203748 |
| 34.78138 | 10.10952 | 15.712357 | 2.35484056 |
| 25.63346 | 6.823873 | 17.355671 | 2.33957162 |
| 25.64226 | 5.366138 | 11.085894 | 1.45065739 |
| 21.39851 | 7.32144  | 11.06859  | 2.84951617 |
| 19.67732 | 3.811459 | 8.4902161 | 2.00432358 |
| 30.20948 | 17.68416 | 19.177786 | 3.38693323 |
| 19.96002 | 8.362244 | 9.1173015 | 1.69472392 |
| 13.31039 | 2.238364 | 7.9400064 | 2.19254036 |
| 9.329035 | 6.22009  | 21.284419 | 1.32929477 |
| 24.21525 | 4.017929 | 9.2875131 | 1.46909526 |
| 20.7712  | 5.771258 | 12.340742 | 2.18754604 |
| 45.86567 | 9.84439  | 15.646321 | 2.62858983 |
| 37.00173 | 15.80284 | 21.14447  | 4.10816586 |
| 22.59908 | 7.581061 | 13.256554 | 2.30028427 |
| 22.98947 | 13.99484 | 10.471441 | 2.5303092  |
| 43.52089 | 9.31245  | 17.841011 | 3.39851641 |
| 44.36669 | 13.78582 | 21.114876 | 2.84886776 |
| 31.32575 | 14.19338 | 19.831589 | 1.98980824 |
| 23.90925 | 9.66577  | 16.178589 | 2.71310351 |
| 34.77822 | 10.78769 | 13.460918 | 2.42469018 |
| 23.84532 | 10.44378 | 17.101126 | 1.99499063 |
| 19.93224 | 9.579246 | 12.335152 | 2.20191306 |
| 18.81283 | 3.201852 | 7.3811683 | 1.18624817 |
| 34.62287 | 4.595389 | 12.95873  | 1.40784099 |
| 19.08198 | 3.315281 | 11.524773 | 1.42071079 |
| 23.62727 | 5.681961 | 14.234385 | 2.37987159 |
| 28.45985 | 8.256219 | 16.260411 | 2.40057874 |
| 26.11508 | 14.43674 | 16.660888 | 2.04104246 |
| 30.32295 | 8.866115 | 15.727243 | 2.09458773 |
| 20.21524 | 9.607196 | 17.727379 | 3.18428107 |
| 30.15709 | 8.749928 | 19.751106 | 4.29755293 |
| 36.69186 | 5.923517 | 17.111519 | 2.18467271 |
| 36.38329 | 7.863554 | 16.380444 | 5.13183545 |
| 23.90319 | 4.795392 | 9.4874069 | 1.80201634 |
| 29.76588 | 10.1753  | 5.4509351 | 2.08496445 |
| 29.52524 | 15.68048 | 27.292002 | 3.05678562 |
| 28.98398 | 12.38723 | 14.036399 | 1.99721522 |
| 26.90606 | 2.845515 | 15.715318 | 2.07451868 |
| 27.77043 | 6.23096  | 15.662692 | 2.23881381 |
| 31.05093 | 3.644591 | 12.57985  | 2.73969433 |
| 38.38965 | 15.30679 | 17.211847 | 3.79003853 |
| 38.65363 | 21.6084  | 16.353239 | 2.72486621 |
| 46.84612 | 11.60908 | 15.222471 | 2.7000274  |

|          |          |           |            |
|----------|----------|-----------|------------|
| 37.86174 | 12.50173 | 11.944425 | 2.23445403 |
| 14.65011 | 2.075598 | 4.2984423 | 0.91874985 |
| 29.90645 | 14.15463 | 8.8628776 | 3.44089931 |
| 37.67502 | 10.14116 | 17.056907 | 2.44342615 |
| 29.88864 | 7.323481 | 9.8879976 | 1.82459771 |
| 34.45653 | 13.94723 | 13.718697 | 2.55819049 |
| 11.12327 | 6.580626 | 17.971403 | 1.42027771 |
| 39.59204 | 5.989289 | 9.7803863 | 2.41886715 |
| 26.23743 | 8.938329 | 11.226224 | 2.76697564 |
| 29.59931 | 9.950426 | 12.415637 | 2.64153701 |
| 22.17124 | 10.93202 | 11.963558 | 2.40469158 |
| 43.60847 | 9.503233 | 16.609344 | 3.39707968 |
| 25.15458 | 11.20534 | 10.062728 | 1.74009293 |
| 36.58475 | 11.37036 | 15.598597 | 2.50712571 |
| 23.55774 | 13.05214 | 14.177275 | 1.69191839 |
| 20.44901 | 11.60253 | 13.208667 | 2.08496279 |
| 28.51306 | 9.20903  | 22.23988  | 3.68322441 |
| 33.57936 | 11.89211 | 13.195829 | 3.24438089 |
| 31.61345 | 8.573044 | 14.599961 | 2.61833259 |
| 21.85563 | 9.200654 | 11.864996 | 2.43965482 |
| 13.09116 | 1.28358  | 5.1235587 | 2.73981386 |
| 21.57744 | 6.582471 | 12.822339 | 1.53105881 |
| 31.86381 | 11.81394 | 13.815159 | 2.41460448 |
| 23.45326 | 8.895896 | 15.122423 | 1.93162931 |
| 20.05855 | 7.841745 | 11.232721 | 1.7205418  |
| 25.05343 | 8.834594 | 15.661349 | 2.70624264 |
| 26.92428 | 11.34304 | 15.288893 | 1.611853   |
| 32.44794 | 14.01899 | 13.387002 | 2.1800098  |
| 23.19415 | 5.951737 | 11.258312 | 2.34189678 |
| 31.90603 | 12.66569 | 16.241859 | 2.51774496 |
| 37.78759 | 9.273453 | 16.830002 | 3.23411325 |
| 23.43622 | 3.494851 | 8.0949028 | 1.27546763 |
| 30.84907 | 3.572113 | 10.853342 | 5.25336818 |
| 36.3012  | 5.53013  | 13.977436 | 6.34724204 |
| 41.32719 | 9.671732 | 19.787373 | 3.34032653 |
| 43.59976 | 14.53958 | 23.032539 | 9.96280781 |
| 52.77114 | 11.55143 | 29.915239 | 15.8857151 |
| 28.62528 | 5.456927 | 19.095339 | 1.63788021 |
| 45.78002 | 12.64883 | 25.292792 | 1.74934992 |
| 43.04419 | 10.96155 | 17.287392 | 2.54065511 |
| 31.3537  | 15.95226 | 15.311201 | 2.5754927  |
| 24.05961 | 22.14568 | 14.200261 | 2.66054319 |
| 32.88161 | 18.94784 | 11.228922 | 7.05598027 |
| 34.85926 | 20.76961 | 22.346187 | 13.5711896 |
| 25.37095 | 10.97851 | 12.501257 | 2.16798106 |
| 33.26159 | 12.46327 | 13.611858 | 7.87715225 |
| 38.90465 | 12.9222  | 25.12106  | 12.0968591 |
| 25.11503 | 9.409322 | 13.356582 | 3.01267709 |
| 22.5442  | 16.42023 | 11.035617 | 2.51791862 |
| 24.76338 | 9.777068 | 8.2331688 | 3.08414865 |
| 39.8677  | 7.550828 | 14.691798 | 2.61091226 |
| 34.86218 | 15.63745 | 12.566214 | 3.10266179 |

|          |          |           |            |
|----------|----------|-----------|------------|
| 39.0147  | 8.161971 | 14.919609 | 3.01019003 |
| 24.57716 | 8.957977 | 16.440884 | 2.1060897  |
| 38.57495 | 14.95667 | 14.881226 | 1.74080758 |
| 23.91782 | 3.211576 | 10.008479 | 2.1472034  |
| 23.37686 | 15.34473 | 19.260626 | 2.14155187 |
| 28.41668 | 10.71267 | 14.725699 | 1.6268924  |
| 34.63207 | 12.05046 | 12.670974 | 2.07412369 |
| 25.80727 | 9.74705  | 15.745469 | 2.04355851 |
| 36.71306 | 6.956487 | 24.975684 | 2.3786325  |
| 46.46379 | 8.326209 | 25.774719 | 4.21820289 |
| 38.50375 | 12.81443 | 15.658605 | 4.28563659 |
| 40.14185 | 9.936963 | 21.470034 | 2.14565775 |
| 26.68681 | 7.469973 | 12.707467 | 2.4999052  |
| 40.21375 | 7.25082  | 24.03857  | 1.41649077 |
| 27.36381 | 5.518036 | 13.013137 | 1.18163116 |
| 37.20519 | 13.80556 | 12.166108 | 3.6000087  |
| 15.64141 | 8.127641 | 9.7994809 | 1.86328637 |
| 32.77521 | 13.29106 | 15.000252 | 2.25059043 |
| 22.00219 | 14.84391 | 16.690933 | 1.90106831 |
| 32.52936 | 11.35606 | 13.543086 | 2.14641016 |
| 26.58926 | 7.576413 | 18.309554 | 2.54051822 |
| 23.60269 | 7.686677 | 13.132639 | 1.93348664 |
| 24.8381  | 15.11115 | 21.430031 | 3.3434265  |
| 37.10906 | 9.320479 | 13.430911 | 2.60122981 |
| 24.69643 | 9.760404 | 14.04525  | 2.27318894 |
| 25.36954 | 6.698846 | 12.656941 | 2.21173844 |
| 29.50003 | 13.89069 | 12.812575 | 2.83536933 |
| 23.45078 | 5.913751 | 16.417263 | 1.80172501 |
| 22.40707 | 11.80837 | 14.64847  | 3.40272489 |
| 28.28202 | 9.538821 | 14.540308 | 3.14694458 |
| 26.48732 | 18.82532 | 16.595435 | 2.72981149 |
| 32.89165 | 5.941965 | 15.236109 | 2.49451369 |
| 12.47337 | 5.582846 | 11.838843 | 2.72759485 |
| 45.86979 | 8.535719 | 17.834818 | 1.71530883 |
| 29.85606 | 8.805096 | 11.740312 | 3.28658771 |
| 27.63454 | 10.08814 | 14.019393 | 2.10173571 |
| 16.29538 | 8.123824 | 13.304497 | 1.27086698 |
| 32.59777 | 8.810612 | 16.983663 | 2.18384834 |
| 41.84789 | 6.712598 | 12.386002 | 1.99380707 |
| 40.18466 | 8.563803 | 26.775354 | 3.48468719 |
| 25.31779 | 6.595614 | 13.480633 | 2.8776406  |
| 40.31998 | 7.083835 | 15.268589 | 2.10222122 |
| 31.08412 | 3.934741 | 11.422992 | 1.67427929 |
| 32.69153 | 9.612544 | 15.057722 | 3.22805675 |
| 33.55206 | 10.47419 | 16.76947  | 3.22975423 |
| 33.38746 | 10.87952 | 17.823822 | 3.08872439 |
| 34.68162 | 13.89054 | 23.481882 | 2.24076838 |
| 44.45443 | 10.86076 | 16.28804  | 2.31658948 |
| 29.76535 | 5.457572 | 10.963193 | 2.38215159 |
| 42.17432 | 7.331576 | 12.738722 | 1.93506611 |
| 15.77746 | 3.579933 | 9.200738  | 2.17705576 |
| 38.56327 | 10.17211 | 21.753621 | 2.5667573  |

|          |          |           |            |
|----------|----------|-----------|------------|
| 31.48032 | 10.82957 | 18.719992 | 2.6746013  |
| 26.4123  | 8.780848 | 18.515469 | 3.40650343 |
| 31.40556 | 24.31171 | 15.050079 | 2.12953489 |
| 39.63101 | 10.74047 | 14.064128 | 2.0463534  |
| 37.54155 | 7.879396 | 12.864113 | 1.73667598 |
| 34.09421 | 8.43925  | 9.8125189 | 3.48998661 |
| 29.1522  | 10.79589 | 17.550899 | 2.56614436 |
| 30.50595 | 8.713841 | 8.7756605 | 1.86763049 |
| 35.54184 | 9.666029 | 15.430961 | 2.19478451 |
| 38.12687 | 9.526396 | 14.733106 | 2.76050201 |
| 32.29668 | 11.4884  | 10.612379 | 3.24674255 |
| 35.71148 | 6.713077 | 17.455891 | 2.23357189 |
| 10.61235 | 0.990922 | 4.5867475 | 1.61063575 |
| 31.50264 | 7.131583 | 16.298539 | 2.61831485 |
| 25.77998 | 5.384314 | 12.689782 | 2.05137978 |
| 21.71586 | 11.115   | 11.345611 | 1.40033114 |
| 32.9051  | 13.46311 | 17.861508 | 3.27040265 |
| 28.67143 | 6.252175 | 15.510977 | 2.47457288 |
| 32.13234 | 6.692955 | 9.3680993 | 1.90921243 |
| 34.36253 | 7.567197 | 16.38146  | 1.90688342 |
| 38.28254 | 9.810921 | 17.164173 | 3.02440361 |
| 24.50479 | 5.480823 | 13.59103  | 1.93285874 |
| 30.17416 | 9.297075 | 11.457055 | 3.42043198 |
| 34.42097 | 12.45938 | 18.757854 | 2.69432946 |
| 31.35932 | 8.7384   | 17.31749  | 2.14398224 |
| 35.17466 | 7.329684 | 14.533464 | 2.63606207 |
| 21.48875 | 10.22639 | 11.322489 | 2.38232751 |
| 39.74579 | 13.10042 | 17.406528 | 1.38648521 |
| 30.97272 | 5.854641 | 25.325891 | 3.20604514 |
| 40.37022 | 6.603444 | 15.343667 | 1.8503003  |
| 29.18126 | 10.00555 | 10.063154 | 2.9089562  |
| 25.78611 | 7.672447 | 11.699868 | 2.38398204 |
| 38.71846 | 7.295565 | 11.240468 | 1.79370659 |
| 29.19266 | 7.596776 | 14.384043 | 2.80959133 |
| 8.651923 | 4.153733 | 6.4820289 | 1.47062718 |
| 34.15733 | 8.159851 | 13.416502 | 2.64477549 |
| 33.28681 | 14.95001 | 21.685134 | 2.16889576 |
| 40.26288 | 9.016186 | 25.991327 | 2.67774387 |
| 27.35738 | 9.805888 | 13.131587 | 4.04374333 |
| 34.00053 | 17.89844 | 15.486486 | 1.97628633 |
| 23.30686 | 8.171939 | 16.04188  | 3.05588024 |
| 16.50676 | 2.760036 | 15.569004 | 1.67190619 |
| 25.76904 | 6.41535  | 20.424439 | 2.49590853 |
| 38.89827 | 8.448942 | 20.495536 | 4.79493525 |
| 39.19998 | 8.449476 | 13.644839 | 5.10748517 |
| 27.06858 | 5.516454 | 17.809451 | 2.82893602 |
| 27.22162 | 6.235395 | 12.001489 | 2.3228817  |
| 35.49165 | 12.53831 | 9.2235048 | 4.30210649 |
| 19.73995 | 15.10194 | 12.726928 | 1.97375734 |
| 29.39729 | 6.529928 | 15.477358 | 2.53591889 |
| 19.35624 | 10.71563 | 11.946715 | 1.71045144 |
| 35.31383 | 9.300537 | 14.546088 | 3.18355343 |

|          |          |           |            |
|----------|----------|-----------|------------|
| 34.75485 | 10.59666 | 15.230639 | 4.16076688 |
| 24.5497  | 7.085039 | 12.024259 | 1.4064993  |
| 19.46131 | 7.102409 | 16.598479 | 3.12860805 |
| 23.92307 | 20.85322 | 15.97074  | 3.14825953 |
| 17.50502 | 3.153108 | 15.310669 | 2.30029926 |
| 27.02541 | 13.53473 | 13.937483 | 2.9833583  |
| 28.83493 | 10.38692 | 13.010847 | 2.0800588  |
| 24.31257 | 7.935588 | 12.989617 | 2.07671475 |
| 26.24639 | 10.05021 | 13.385305 | 3.14644904 |
| 19.27016 | 10.94941 | 9.7058936 | 2.87004749 |
| 18.83049 | 4.658489 | 12.968412 | 1.44470701 |
| 36.62618 | 9.609703 | 15.507117 | 3.07096849 |
| 14.9657  | 5.703853 | 9.9108908 | 2.09181837 |
| 32.28174 | 9.775586 | 9.0678621 | 3.18626854 |
| 35.27898 | 11.59871 | 15.494218 | 2.58396329 |
| 29.72027 | 15.40284 | 13.915855 | 2.50818332 |
| 33.21159 | 15.20469 | 11.109845 | 2.11977526 |
| 30.11216 | 6.192353 | 15.390127 | 2.05943014 |
| 31.32973 | 5.563032 | 9.9167031 | 2.14773907 |
| 24.45578 | 14.3748  | 14.574695 | 1.9770651  |
| 25.51517 | 5.383587 | 13.410504 | 2.51153027 |
| 29.42743 | 11.61029 | 13.290654 | 3.15081201 |
| 34.54626 | 10.00781 | 18.352294 | 2.62278741 |
| 40.83137 | 8.288378 | 18.395515 | 2.80175462 |
| 38.09548 | 13.62259 | 13.72535  | 2.84425748 |
| 40.43551 | 13.93738 | 11.251125 | 2.75672709 |
| 34.23033 | 14.3245  | 14.682323 | 2.95082568 |
| 21.64706 | 7.884857 | 15.764201 | 1.96908529 |
| 33.44408 | 12.83699 | 16.471922 | 2.91112255 |
| 34.45039 | 3.186045 | 7.8864819 | 5.0487842  |
| 22.89774 | 4.755012 | 15.090969 | 1.77448788 |
| 35.90401 | 10.03448 | 12.477714 | 2.52458422 |
| 33.42209 | 10.86641 | 9.427552  | 3.24221416 |
| 27.57647 | 8.461446 | 20.166916 | 3.27791062 |
| 36.17335 | 9.28764  | 16.751924 | 3.36184049 |
| 24.81148 | 2.39592  | 21.619517 | 2.65153186 |
| 29.22432 | 9.655697 | 10.49209  | 2.17233953 |
| 27.86515 | 6.919172 | 9.4978922 | 2.78051499 |
| 30.42677 | 8.929836 | 10.733983 | 3.29911066 |
| 34.33538 | 12.76233 | 15.821658 | 3.11697923 |
| 40.04423 | 13.02199 | 16.904811 | 3.42410443 |
| 16.19386 | 7.363926 | 9.6393191 | 1.81192304 |
| 25.04563 | 3.827976 | 20.856255 | 1.97629354 |
| 37.237   | 14.33151 | 17.311306 | 2.52671653 |
| 34.97568 | 14.3399  | 20.531539 | 3.26649814 |
| 35.3838  | 10.80878 | 13.383391 | 2.11384622 |
| 37.27491 | 8.938139 | 17.749133 | 4.18862033 |
| 19.57842 | 9.063725 | 15.169893 | 2.12451863 |
| 18.4738  | 4.130362 | 11.186001 | 1.55211078 |
| 30.87606 | 12.76726 | 13.858599 | 2.46615021 |
| 13.88564 | 5.324176 | 6.118049  | 2.03242807 |
| 37.78777 | 9.431587 | 13.560892 | 1.90217264 |

|          |          |           |            |
|----------|----------|-----------|------------|
| 36.06481 | 10.57375 | 12.089508 | 2.16307943 |
| 19.82691 | 9.910243 | 14.210691 | 1.54826541 |
| 12.18158 | 4.428759 | 13.983734 | 1.18707654 |
| 17.80573 | 8.265596 | 13.272931 | 1.63397106 |
| 32.67575 | 7.415314 | 10.182567 | 1.42676346 |
| 16.32218 | 7.975503 | 8.854905  | 1.6065743  |
| 28.60737 | 12.35785 | 8.550764  | 1.98227257 |
| 27.24862 | 10.40383 | 7.0988908 | 2.15842864 |
| 26.38108 | 8.82     | 12.080541 | 2.65073553 |
| 23.9494  | 16.54725 | 13.478644 | 2.2985912  |
| 30.15682 | 8.337373 | 14.797458 | 2.80414247 |
| 16.32851 | 4.30571  | 5.5610186 | 1.96638847 |
| 30.47884 | 10.80357 | 15.051016 | 3.01264922 |
| 35.51157 | 12.92273 | 21.643267 | 2.46886227 |
| 24.58943 | 12.84723 | 22.311973 | 2.45428934 |
| 19.56582 | 8.420585 | 9.7511482 | 1.24459675 |
| 15.94503 | 4.011976 | 7.5651766 | 1.54422351 |
| 39.46666 | 15.25317 | 12.663614 | 3.23727964 |
| 36.39206 | 12.15403 | 13.859436 | 2.43338109 |
| 25.34818 | 11.53207 | 16.061382 | 2.06509689 |
| 26.73205 | 22.59878 | 18.36778  | 2.70698941 |
| 22.87154 | 15.71342 | 17.440245 | 2.93262151 |
| 33.39417 | 5.996961 | 14.811492 | 3.44503564 |
| 30.45833 | 12.68185 | 17.600068 | 2.93839108 |
| 28.88835 | 13.40957 | 12.509462 | 2.9903056  |
| 37.72878 | 9.405676 | 18.550248 | 3.3426222  |
| 32.5761  | 11.95006 | 10.182976 | 2.78822816 |
| 35.67308 | 8.438409 | 12.920748 | 2.74085199 |
| 25.33073 | 8.457925 | 13.860354 | 2.04721612 |
| 30.61946 | 15.21045 | 15.688129 | 4.40172426 |
| 16.20762 | 4.678641 | 10.869644 | 1.69484609 |
| 42.72487 | 8.810697 | 15.319136 | 3.53688447 |
| 25.10568 | 7.671842 | 16.85453  | 3.93944952 |
| 28.03423 | 10.76041 | 18.582149 | 2.71952677 |
| 29.42216 | 6.273755 | 14.762922 | 1.7340001  |
| 32.97365 | 11.03318 | 15.934304 | 2.89392509 |
| 24.01428 | 12.90788 | 14.699612 | 2.44025944 |
| 20.73797 | 6.663688 | 16.170476 | 2.33937599 |
| 17.8483  | 11.37964 | 14.282134 | 1.77734485 |
| 42.772   | 8.942254 | 11.928275 | 2.0867385  |
| 24.99058 | 9.347659 | 16.156868 | 2.43217195 |
| 30.82017 | 9.637199 | 13.756293 | 2.15182363 |
| 24.86081 | 6.00453  | 10.720603 | 1.90749081 |
| 27.97483 | 15.03838 | 16.344703 | 1.96569624 |
| 23.12718 | 5.171286 | 15.226906 | 1.85310934 |
| 31.78741 | 8.895077 | 12.221098 | 2.6974555  |
| 25.45303 | 7.376815 | 21.240293 | 3.32955232 |
| 21.17787 | 5.347946 | 14.336787 | 2.38432351 |
| 20.17843 | 8.143592 | 14.832199 | 2.6889571  |
| 23.92227 | 10.45112 | 18.287797 | 2.36144372 |
| 28.31819 | 20.5604  | 18.099096 | 1.98280256 |
| 29.87771 | 11.58847 | 15.697072 | 2.22388475 |

|          |          |           |            |
|----------|----------|-----------|------------|
| 22.82925 | 5.898448 | 9.440147  | 2.13860947 |
| 20.62992 | 7.963485 | 26.225258 | 2.4885385  |
| 24.75145 | 10.4002  | 14.30207  | 2.6008286  |
| 22.75645 | 9.445615 | 16.857993 | 2.34109996 |
| 12.0484  | 3.847847 | 18.792901 | 1.8568378  |
| 30.26481 | 8.689111 | 10.031518 | 2.30386199 |
| 23.26659 | 12.18163 | 10.755309 | 2.24077462 |
| 32.75982 | 13.36054 | 17.782759 | 3.00544197 |
| 23.33873 | 8.829981 | 15.388739 | 2.1855172  |
| 34.70237 | 11.15198 | 10.864979 | 1.69929644 |
| 34.50411 | 12.13885 | 16.481754 | 2.420832   |
| 27.8184  | 10.78564 | 20.065055 | 3.12237839 |
| 29.64781 | 10.99607 | 12.005736 | 2.80731227 |
| 29.74457 | 7.538956 | 13.378219 | 1.96652074 |
| 35.19707 | 16.42305 | 12.991559 | 1.92831838 |
| 34.31755 | 12.45011 | 17.551925 | 2.24553191 |
| 33.75797 | 10.06383 | 13.182108 | 2.05988762 |
| 33.85415 | 10.3501  | 13.601372 | 1.83912232 |
| 34.11156 | 10.36975 | 16.445075 | 2.4727766  |
| 19.22943 | 9.799992 | 15.651005 | 1.43390423 |
| 30.23439 | 9.70405  | 17.998482 | 2.7765613  |
| 29.66838 | 9.921166 | 13.521398 | 2.36440171 |
| 30.3907  | 12.18714 | 14.187016 | 3.7089252  |
| 20.15118 | 12.06655 | 10.787466 | 1.72806735 |
| 16.87279 | 11.66117 | 11.260389 | 2.14042743 |
| 25.41647 | 8.844893 | 10.194697 | 3.14471347 |
| 22.91517 | 13.231   | 12.631452 | 1.45381881 |
| 17.2345  | 11.94425 | 13.436839 | 2.14897914 |
| 29.63454 | 11.17947 | 16.411114 | 2.11429216 |
| 18.44331 | 12.36136 | 6.8002922 | 1.71716307 |
| 21.46826 | 10.42657 | 7.78375   | 2.38138508 |
| 20.709   | 4.846391 | 14.493099 | 3.32633796 |
| 22.68036 | 16.30372 | 10.437899 | 1.89784457 |
| 29.63721 | 9.053453 | 14.317788 | 2.21823495 |
| 38.42641 | 15.56149 | 13.21978  | 2.48106216 |
| 25.87664 | 13.15896 | 18.491387 | 1.70152654 |
| 18.66544 | 8.111111 | 14.360976 | 2.01614848 |
| 24.73024 | 11.10042 | 11.898954 | 2.69527842 |
| 36.32084 | 10.07722 | 15.188561 | 3.58679579 |
| 25.97547 | 14.59208 | 21.016192 | 2.1359677  |
| 25.48236 | 5.776497 | 14.03626  | 1.74683942 |
| 24.9966  | 10.2307  | 16.548235 | 3.09663907 |
| 21.57357 | 10.91381 | 13.45552  | 1.93558612 |
| 30.7802  | 23.91173 | 18.03158  | 2.93134494 |
| 23.59597 | 12.79637 | 12.397194 | 2.61163316 |
| 33.98864 | 13.89578 | 12.070187 | 3.3833109  |
| 21.33518 | 16.2253  | 7.9482904 | 2.79307818 |
| 27.36793 | 10.44852 | 7.885779  | 2.39773117 |
| 24.58514 | 16.47099 | 12.395701 | 2.94477946 |
| 30.10032 | 11.50249 | 12.743105 | 2.63064443 |
| 32.47391 | 9.928034 | 14.097818 | 2.40856235 |
| 34.44167 | 16.72562 | 13.044719 | 2.21361651 |



|          |          |           |            |
|----------|----------|-----------|------------|
| 19.08181 | 7.151793 | 13.3405   | 3.15737456 |
| 23.57638 | 5.845655 | 30.502301 | 3.18095939 |
| 29.62155 | 11.98141 | 14.937087 | 2.89151343 |
| 47.75401 | 11.11651 | 19.392244 | 1.79810658 |
| 41.44557 | 10.31452 | 21.350642 | 3.69934719 |
| 24.52359 | 12.43954 | 20.661019 | 2.32713662 |
| 33.82277 | 13.77101 | 8.3609453 | 2.57511231 |
| 34.45415 | 7.671467 | 11.497464 | 2.01864379 |
| 24.80696 | 12.07552 | 12.260946 | 1.96565325 |
| 34.48743 | 8.355168 | 12.592976 | 2.54291461 |
| 24.03552 | 9.553813 | 9.5174899 | 2.65622811 |
| 33.86225 | 17.11087 | 7.4257348 | 3.51121633 |
| 34.51726 | 10.86321 | 22.535869 | 2.02211562 |
| 38.50997 | 7.938439 | 16.917229 | 3.05886665 |
| 26.31743 | 10.2937  | 16.564653 | 3.08382574 |
| 28.55161 | 12.14853 | 16.300637 | 2.95199924 |
| 35.40828 | 12.97663 | 11.612738 | 3.11952485 |
| 26.47405 | 7.933529 | 15.256737 | 2.38646827 |
| 30.47659 | 7.291793 | 13.699149 | 1.95401713 |
| 28.65098 | 11.82266 | 12.945549 | 2.00770325 |
| 26.98794 | 8.89653  | 11.264433 | 2.03576685 |
| 31.46706 | 8.40342  | 12.685289 | 3.43400701 |
| 42.38423 | 6.956994 | 15.326328 | 1.6437025  |
| 30.69081 | 16.01711 | 17.863525 | 2.61925071 |
| 23.35661 | 13.96451 | 7.9799072 | 2.45551152 |
| 35.60307 | 6.654068 | 20.578072 | 1.82309302 |
| 30.60586 | 12.73385 | 13.533383 | 1.59346343 |
| 33.09347 | 7.479485 | 14.50259  | 2.54285367 |
| 27.1578  | 9.793944 | 9.3690257 | 2.49933082 |
| 29.04504 | 13.44626 | 14.090543 | 2.50088863 |
| 19.91028 | 14.22105 | 14.23605  | 1.75962374 |
| 46.17355 | 13.04158 | 13.384577 | 2.67209246 |
| 28.2629  | 6.539497 | 11.500737 | 2.0366406  |
| 54.01858 | 19.03617 | 13.359538 | 4.04842364 |
| 24.74805 | 4.534486 | 11.356829 | 2.66549633 |
| 41.93817 | 12.48614 | 20.101278 | 2.32775325 |
| 15.97292 | 3.912519 | 12.209651 | 1.68167935 |
| 30.34101 | 7.49214  | 11.099849 | 1.54043774 |
| 28.39116 | 7.483783 | 13.059248 | 2.36139393 |
| 30.44333 | 9.576479 | 16.220716 | 2.70396425 |
| 26.87342 | 16.08331 | 10.728177 | 1.77987004 |
| 25.03299 | 14.06515 | 8.8597657 | 2.24109437 |
| 50.13966 | 15.44679 | 16.937902 | 4.53072001 |
| 19.46048 | 9.514948 | 12.467796 | 2.45172229 |
| 23.45889 | 8.896809 | 13.149438 | 2.35278838 |
| 36.62991 | 11.97669 | 20.999262 | 3.6537772  |
| 21.68517 | 4.670048 | 11.317794 | 2.50202216 |
| 32.69529 | 12.14591 | 15.545237 | 3.73737986 |
| 30.65706 | 11.68656 | 13.534778 | 2.91279555 |
| 28.53403 | 5.751239 | 16.311143 | 2.5881399  |
| 35.40843 | 8.789501 | 16.088801 | 2.87830212 |
| 32.59223 | 12.34413 | 13.000153 | 3.46337707 |

|          |          |           |            |
|----------|----------|-----------|------------|
| 23.42044 | 7.05851  | 15.498926 | 1.83647072 |
| 34.01034 | 12.88791 | 13.027819 | 2.98918226 |
| 26.74085 | 9.161207 | 13.904831 | 2.51975733 |
| 19.48345 | 8.290438 | 15.263456 | 1.86484992 |
| 32.66049 | 2.981055 | 18.291511 | 1.91122424 |
| 37.46136 | 14.86358 | 20.988182 | 3.81328144 |
| 38.61902 | 6.264507 | 15.280663 | 1.96856958 |
| 29.5681  | 9.513705 | 15.204699 | 2.23209772 |
| 28.31436 | 9.719863 | 11.343736 | 1.37446076 |
| 30.63831 | 12.94561 | 16.09096  | 2.965776   |
| 29.96615 | 14.02005 | 9.4249958 | 2.10240805 |
| 18.40312 | 3.900933 | 11.641178 | 1.9760394  |
| 39.69646 | 7.146474 | 13.804586 | 2.19336254 |
| 12.3664  | 3.427521 | 9.8728663 | 2.92705333 |
| 33.61764 | 4.354477 | 9.6020603 | 1.74650321 |
| 31.38159 | 9.479238 | 18.453733 | 2.98315817 |
| 25.43042 | 7.590692 | 10.825374 | 2.21040807 |
| 36.78248 | 2.09034  | 11.113187 | 1.93295605 |
| 17.24858 | 6.494641 | 12.124988 | 1.70968845 |
| 35.77602 | 8.876258 | 12.108089 | 3.18813679 |
| 23.02378 | 8.384354 | 13.584508 | 2.07291684 |
